# Supplementary material for: Direct acylcyanation of aryl alkenes by dual photoredox and copper catalysis
Source: Royal Society of Chemistry journal article supplement (doi:10.1039/d3qo00592e), 2023-01-01

## Supporting Information

# Direct Acylcyanation of Aryl Alkenes by Dual Photoredox and Copper Catalysis

Chun-Lin Dong,<sup>a</sup> Zhi Guan,<sup>\*a</sup> and Yan-Hong He<sup>\*a</sup>

<sup>a</sup> Key Laboratory of Applied Chemistry of Chongqing Municipality, School of Chemistry and Chemical Engineering, Southwest University, Chongqing 400715, China

[Emails: [guan\\_zhi@swu.edu.cn](mailto:guan_zhi@swu.edu.cn) (for Z. Guan); [heyh@swu.edu.cn](mailto:heyh@swu.edu.cn) (for Y.-H. He)]

# Contents

–

|                                                                          |     |
|--------------------------------------------------------------------------|-----|
| 1. General methods .....                                                 | S1  |
| 2. General procedure for the synthesis of products <b>d</b> .....        | S1  |
| 3. Optimization of reaction conditions.....                              | S2  |
| 4. Mechanistic investigation .....                                       | S5  |
| 4.1 Radical trapping experiments .....                                   | S5  |
| 4.2 Emission spectrum of the LED light.....                              | S10 |
| 4.3 The UV-Vis absorption spectrum .....                                 | S10 |
| 4.4 Fluorescence quenching experiments .....                             | S11 |
| 4.5 Cyclic voltammetry experiments .....                                 | S15 |
| 5. The enantioselective acylcyanation of 4-methylstyrene <b>1a</b> ..... | S17 |
| 6. Characterization data of the products .....                           | S19 |
| 7. References.....                                                       | S35 |
| 8. NMR of products .....                                                 | S36 |
| 9. HRMS of products .....                                                | S82 |

## 1. General methods

Unless otherwise noted, all reagents were purchased from commercial suppliers and used without further purification. All solvents were pre-dried with active molecular sieves. Reactions were monitored by thin-layer chromatography (TLC) with Haiyang GF 254 silica gel plates (Qingdao Haiyang chemical industry Co Ltd, Qingdao, China) using UV light and phosphomolybdic acid as visualizing agents. Flash column chromatography was performed using 200-300 mesh silica gel at increased pressure.  $^1\text{H}$  NMR spectra,  $^{13}\text{C}$  NMR spectra and  $^{19}\text{F}$  spectra were respectively recorded on 600/400 MHz NMR Bruker spectrometers. Chemical shifts ( $\delta$ ) were expressed in ppm with TMS as the internal standard, and coupling constants ( $J$ ) were reported in Hz. High-resolution mass spectra were obtained by using ESI ionization sources (quadrupole time-of-flight mass spectrometer, Bruker Impact II, Bremen, Germany).

## 2. General procedure for the synthesis of products **d**

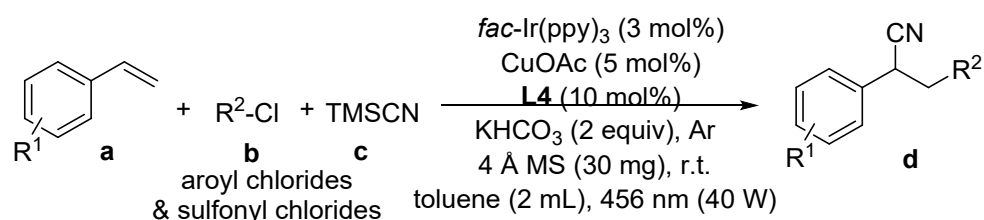

A 10 mL flame-dried Schlenk tube equipped with a stirring bar was charged with alkene **a** (0.2 mmol, 1.0 equiv) (if solid), aroyl chloride or sulfonyl chloride **b** (0.6 mmol, 3.0 equiv) (if solid),  $fac\text{-Ir(ppy)}_3$  (0.006 mmol, 3 mol%), CuOAc (0.01 mmol, 5 mol%), **L4** (0.02 mmol, 10 mol%),  $\text{KHCO}_3$  (0.4 mmol, 2.0 equiv) and 4 Å MS powder (30 mg). The resulting mixture was evacuated and backfilled with Ar three times, followed by the addition of toluene (2 mL). Then, the mixture was stirred at room temperature for 30 min. Subsequently, alkene **a** (0.2 mmol, 1.0 equiv) (if liquid), aroyl chloride or sulfonyl chloride **b** (0.6 mmol, 3.0 equiv) (if liquid) and TMSCN **c** (0.6 mmol, 3.0 equiv) were added into the mixture by microliter syringes. The mixture was stirred under irradiation of 40 W 456 nm Kessil Tuna blue lamp (the distance between lamp and the tube is about 3 cm). After completion of the reaction (detected by TLC), the reaction mixture was diluted with dichloromethane, filtered through a short pad of celite. The filtrate was evaporated in vacuo to remove the solvent and purified by flash chromatography on silica gel with petroleum ether/ethyl acetate as the eluent to give

desired product **d**.

### 3. Optimization of reaction conditions

**Table S1.** Ligand screening <sup>a</sup>

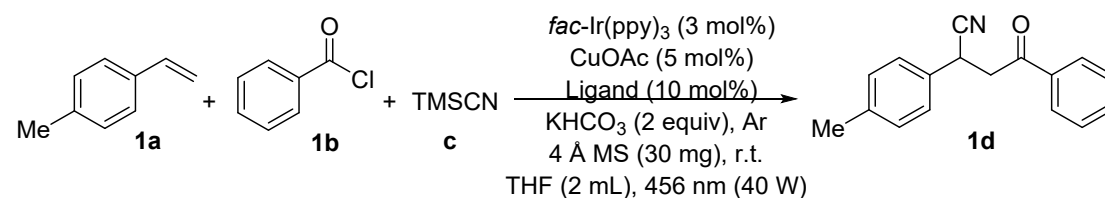

| Entry    | Ligand                | Yield (%) <sup>b</sup> |
|----------|-----------------------|------------------------|
| 1        | --                    | 35                     |
| 2        | <b>L1</b>             | 54                     |
| 3        | <b>L2</b>             | 66                     |
| 4        | <b>L3</b>             | 42                     |
| <b>5</b> | <b>L4<sup>c</sup></b> | <b>72</b>              |
| 6        | <b>L5</b>             | 37                     |
| 7        | <b>L6</b>             | 50                     |
| 8        | <b>L7</b>             | Trace                  |
| 9        | <b>L8</b>             | 20                     |
| 10       | <b>L9</b>             | 42                     |
| 11       | <b>L10</b>            | 46                     |
| 12       | <b>L11</b>            | N.D. <sup>d</sup>      |
| 13       | <b>L12</b>            | N.D. <sup>d</sup>      |
| 14       | <b>L13</b>            | 59                     |
| 15       | <b>L14</b>            | 45                     |

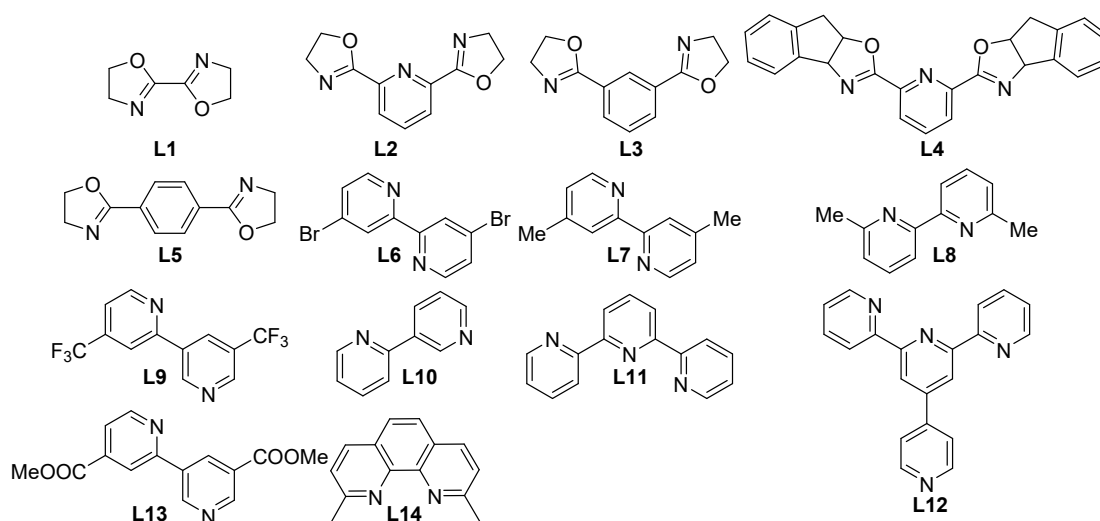

<sup>a</sup>Reaction conditions: **1a** (0.2 mmol, 1.0 equiv), **1b** (0.6 mmol, 3.0 equiv), **c** (0.6 mmol, 3.0 equiv), *fac*-Ir(ppy)<sub>3</sub> (0.006 mmol, 3 mol%), CuOAc (0.01 mmol, 5 mol%), ligand (0.02 mmol, 10 mol%), KHCO<sub>3</sub> (0.4 mmol, 2.0 equiv) and 4 Å MS powder (30 mg) in THF (2 mL)

irradiated with 40 W 456 nm Kessil Tuna blue lamp under Ar atmosphere (Ar balloon) at room temperature for 27 h. <sup>b</sup>Yield of the isolated product after chromatography on silica gel. <sup>c</sup>**L4** is a racemic mixture. <sup>d</sup>N.D. = Not Detected.

**Table S2.** Copper salt screening <sup>a</sup>

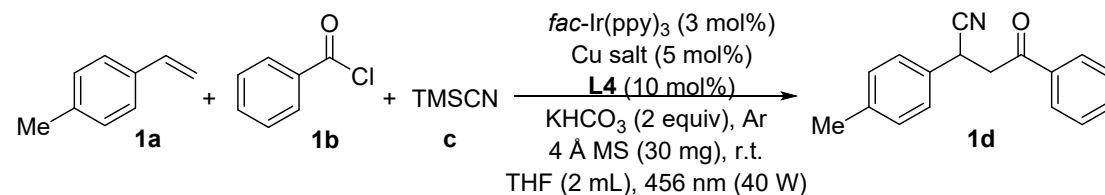

| Entry    | Cu salts                              | Yield (%) <sup>b</sup> |
|----------|---------------------------------------|------------------------|
| <b>1</b> | <b>CuOAc</b>                          | <b>72</b>              |
| 2        | Cu(MeCN) <sub>4</sub> BF <sub>4</sub> | 43                     |
| 3        | Cu(MeCN) <sub>4</sub> PF <sub>6</sub> | 30                     |
| 4        | Cu(OAc) <sub>2</sub>                  | 60                     |
| 5        | CuCl                                  | 61                     |
| 6        | CuBr                                  | 70                     |
| 7        | CuI                                   | 48                     |

<sup>a</sup>Reaction conditions: **1a** (0.2 mmol, 1.0 equiv), **1b** (0.6 mmol, 3.0 equiv), **c** (0.6 mmol, 3.0 equiv), *fac*-Ir(ppy)<sub>3</sub> (0.006 mmol, 3 mol%), Cu salt (0.01 mmol, 5 mol%), **L4** (0.02 mmol, 10 mol%), KHCO<sub>3</sub> (0.4 mmol, 2.0 equiv) and 4 Å MS powder (30 mg) in THF (2 mL) irradiated with 40 W 456 nm Kessil Tuna blue lamp under Ar atmosphere (Ar balloon) at room temperature for 27 h. <sup>b</sup>Yield of the isolated product after chromatography on silica gel.

**Table S3.** Effect of solvent on the reaction <sup>a</sup>

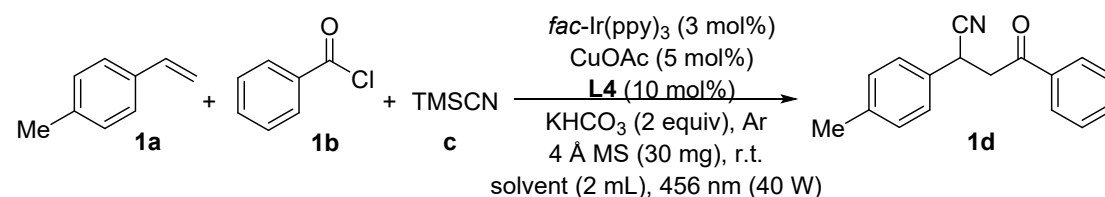

| Entry    | Solvent        | Yield (%) <sup>b</sup> |
|----------|----------------|------------------------|
| 1        | MeCN           | N.D.                   |
| 2        | 1,4-Dioxane    | Trace                  |
| 3        | DCM            | Trace                  |
| 4        | DMF            | N.D.                   |
| 5        | THF            | 72                     |
| 6        | DCE            | 45                     |
| 7        | MTBE           | 43                     |
| <b>8</b> | <b>Toluene</b> | <b>76</b>              |

<sup>a</sup>Reaction conditions: **1a** (0.2 mmol, 1.0 equiv), **1b** (0.6 mmol, 3.0 equiv), **c** (0.6 mmol, 3.0 equiv), *fac*-Ir(ppy)<sub>3</sub> (0.006 mmol, 3 mol%), CuOAc (0.01 mmol, 5 mol%), **L4** (0.02 mmol, 10 mol%), KHCO<sub>3</sub> (0.4 mmol, 2.0 equiv) and 4 Å MS powder (30 mg) in solvent (2 mL)

irradiated with 40 W 456 nm Kessil Tuna blue lamp under Ar atmosphere (Ar balloon) at room temperature for 27 h. <sup>b</sup>Yield of the isolated product after chromatography on silica gel.

**Table S4.** Photocatalyst screening <sup>a</sup>

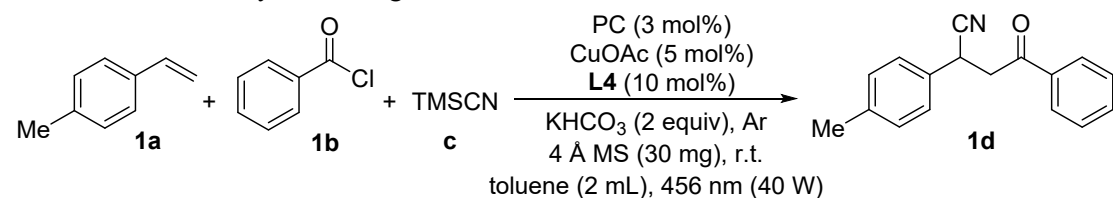

| Entry | PC                                                                                  | Yield (%) <sup>b</sup> |
|-------|-------------------------------------------------------------------------------------|------------------------|
| 1     | Ir[dF(CF <sub>3</sub> )ppy] <sub>2</sub> (5,5'-CF <sub>3</sub> bpy))PF <sub>6</sub> | Trace                  |
| 2     | Perylene                                                                            | Trace                  |
| 3     | Ph-PTZ                                                                              | N.D.                   |
| 4     | <b>Fac-Ir(ppy)<sub>3</sub></b>                                                      | <b>76</b>              |

<sup>a</sup>Reaction conditions: **1a** (0.2 mmol, 1.0 equiv), **1b** (0.6 mmol, 3.0 equiv), **c** (0.6 mmol, 3.0 equiv), PC (0.006 mmol, 3 mol%), CuOAc (0.01 mmol, 5 mol%), **L4** (0.02 mmol, 10 mol%), KHCO<sub>3</sub> (0.4 mmol, 2.0 equiv) and 4 Å MS powder (30 mg) in toluene (2 mL) irradiated with 40 W 456 nm Kessil Tuna blue lamp under Ar atmosphere (Ar balloon) at room temperature for 27 h. <sup>b</sup>Yield of the isolated product after chromatography on silica gel.

**Table S5.** Influence of base on the reaction <sup>a</sup>

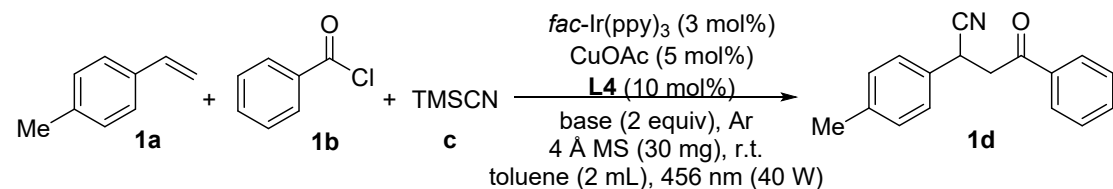

| Entry | Base                           | Yield     |
|-------|--------------------------------|-----------|
| 1     | --                             | 61        |
| 2     | <b>KHCO<sub>3</sub></b>        | <b>76</b> |
| 3     | NaHCO <sub>3</sub>             | 61        |
| 4     | K <sub>2</sub> CO <sub>3</sub> | 64        |

<sup>a</sup>Reaction conditions: **1a** (0.2 mmol, 1.0 equiv), **1b** (0.6 mmol, 3.0 equiv), **c** (0.6 mmol, 3.0 equiv), *fac*-Ir(ppy)<sub>3</sub> (0.006 mmol, 3 mol%), CuOAc (0.01 mmol, 5 mol%), **L4** (0.02 mmol, 10 mol%), base (0.4 mmol, 2.0 equiv) and 4 Å MS powder (30 mg) in toluene (2 mL) irradiated with 40 W 456 nm Kessil Tuna blue lamp under Ar atmosphere (Ar balloon) at room temperature for 27 h. <sup>b</sup>Yield of the isolated product after chromatography on silica gel.

**Table S6.** Effect of KHCO<sub>3</sub> loading on the reaction <sup>a</sup>

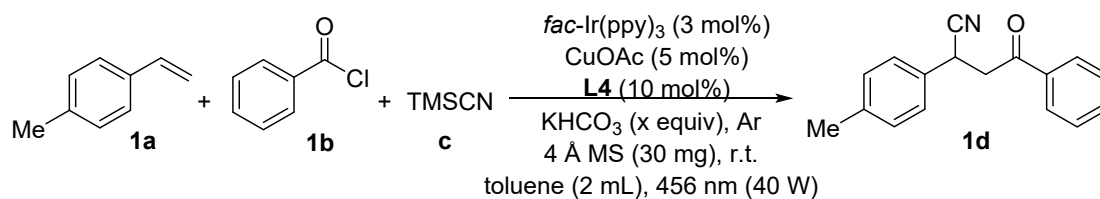

| Entry    | KHCO <sub>3</sub> (x equiv) | Yield (%) <sup>b</sup> |
|----------|-----------------------------|------------------------|
| 1        | 0.0                         | 61                     |
| 2        | 1.0                         | 74                     |
| <b>3</b> | <b>2.0</b>                  | <b>76</b>              |
| 4        | 3.0                         | 61                     |
| 5        | 4.0                         | 65                     |

<sup>a</sup>Reaction conditions: **1a** (0.2 mmol, 1.0 equiv), **1b** (0.6 mmol, 3.0 equiv), **c** (0.6 mmol, 3.0 equiv), *fac*-Ir(ppy)<sub>3</sub> (0.006 mmol, 3 mol%), CuOAc (0.01 mmol, 5 mol%), **L4** (0.02 mmol, 10 mol%), KHCO<sub>3</sub> (x equiv) and 4 Å MS powder (30 mg) in toluene (2 mL) irradiated with 40 W 456 nm Kessil Tuna blue lamp under Ar atmosphere (Ar balloon) at room temperature for 27 h. <sup>b</sup>Yield of the isolated product after chromatography on silica gel.

**Table S7.** Control experiments <sup>a</sup>

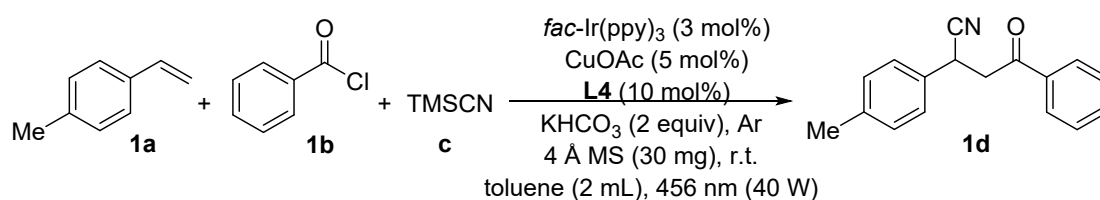

| Entry | Variation from standard conditions  | Yield (%) <sup>b</sup> |
|-------|-------------------------------------|------------------------|
| 1     | None                                | 76                     |
| 2     | Dark                                | N.D.                   |
| 3     | No <i>fac</i> -Ir(ppy) <sub>3</sub> | N.D.                   |
| 4     | No CuOAc                            | N.D.                   |
| 5     | No <b>L4</b>                        | 31                     |
| 6     | No 4 Å MS                           | 61                     |

<sup>a</sup>Standard conditions: **1a** (0.2 mmol, 1.0 equiv), **1b** (0.6 mmol, 3.0 equiv), **c** (0.6 mmol, 3.0 equiv), *fac*-Ir(ppy)<sub>3</sub> (0.006 mmol, 3 mol%), CuOAc (0.01 mmol, 5 mol%), **L4** (0.02 mmol, 10 mol%), KHCO<sub>3</sub> (0.4 mmol, 2.0 equiv) and 4 Å MS powder (30 mg) in toluene (2 mL) irradiated with 40 W 456 nm Kessil Tuna blue lamp under Ar atmosphere (Ar balloon) at room temperature for 27 h. <sup>b</sup>Yield of the isolated product after chromatography on silica gel.

## 4. Mechanistic investigation

### 4.1 Radical trapping experiments

In order to confirm if the reaction undergoes a radical mechanism, common radical scavengers, 2,2,6,6-tetramethylpiperidinoxy (TEMPO), 2,6-di-*tert*-butyl-4-methylphenol (BHT) and 1,1-diphenylethylene (DE) were employed for the radical trapping and inhibition experiments (Scheme S1). When TEMPO (3.0 equiv to **1a**) and BHT (3.0 equiv to **1a**) were added separately into the model reaction system at the beginning of the reaction under the standard conditions, no product was detected even after 27 h. Only a trace amount of product was observed when DE (3.0 equiv to **1a**) was added at the beginning of the reaction. These results suggested that the reaction may involve a radical process. After 27 hours, a small amount of reaction mixture was taken out for high-resolution mass spectrometry (HRMS) measurement (Figures S5 and S6).

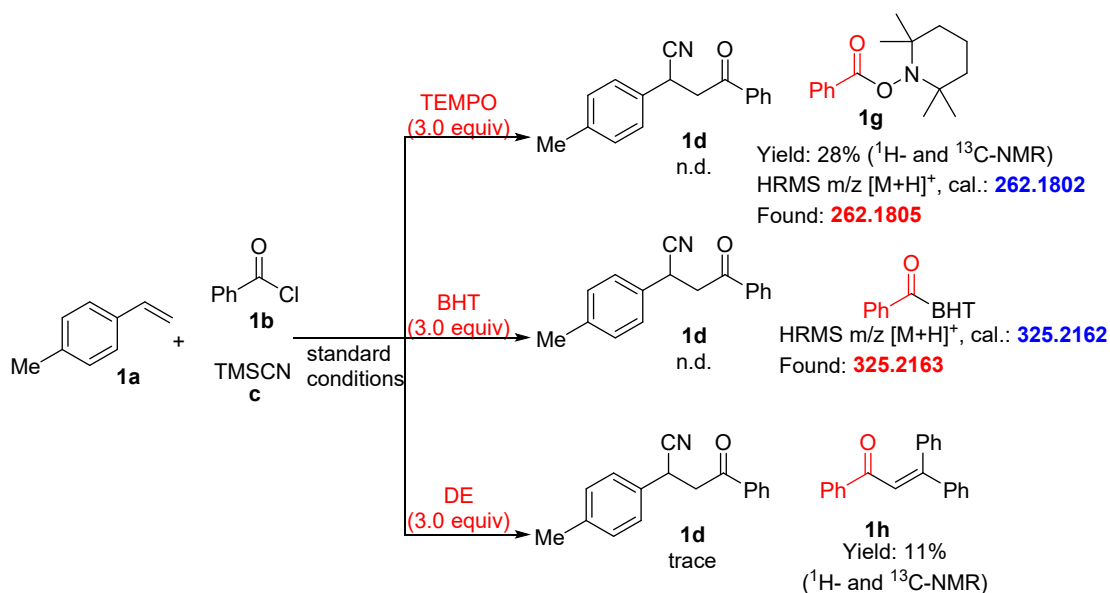

**Scheme S1.** Radical trapping experiments.

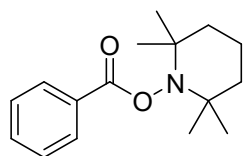

**2,2,6,6-Tetramethylpiperidin-1-yl benzoate (1g)**<sup>1</sup>:  $R_f = 0.25$  (Petroleum ether/EtOAc, 100:1). 44.6 mg, 28% yield. White solid.  $^1\text{H}$  NMR (400 MHz, Chloroform-*d*)  $\delta$  8.09 – 8.07 (m, 2H), 7.59 – 7.55 (m, 1H), 7.48 – 7.44 (m, 2H), 1.83 – 1.64 (m, 3H), 1.61 – 1.57 (m, 2H), 1.48 – 1.43 (m, 1H), 1.28 (s, 6H), 1.12 (s, 6H).  $^{13}\text{C}$  NMR (101 MHz, Chloroform-*d*)  $\delta$  166.4, 132.8, 129.8, 129.6, 128.4, 60.4, 39.1, 32.0, 20.9, 17.0.



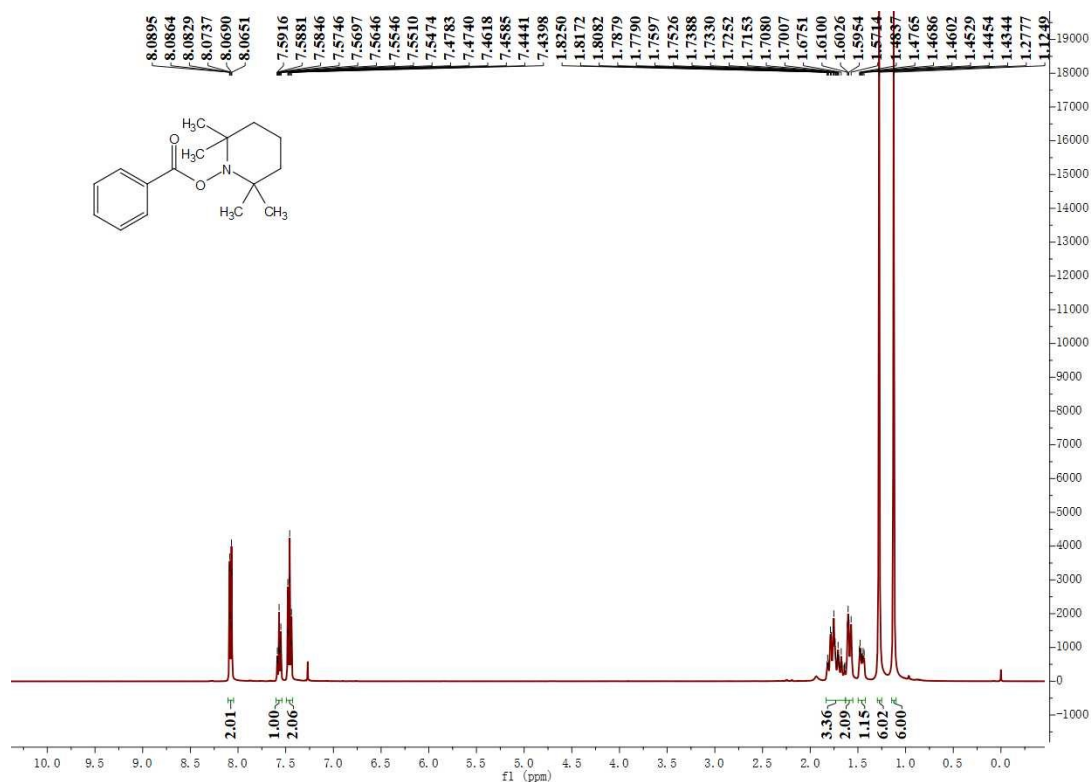

**Figure S1.**  $^1\text{H-NMR}$  Spectrum (400 MHz,  $\text{CDCl}_3$ ) of **1g**

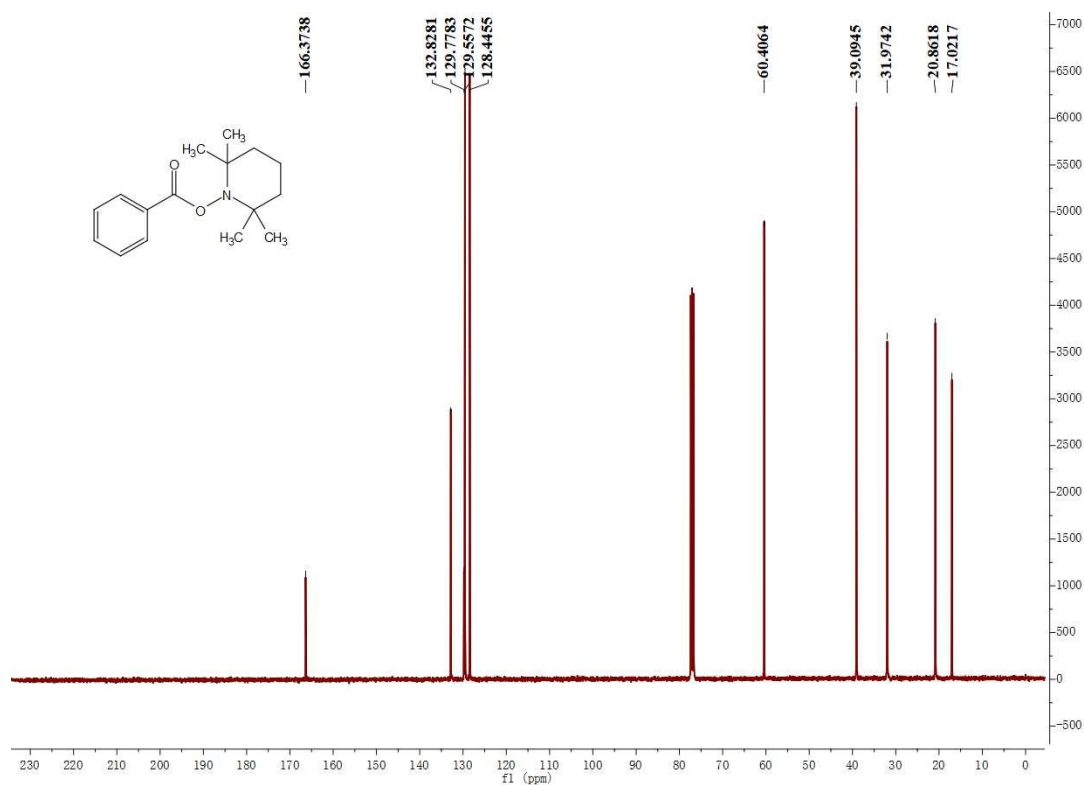

**Figure S2.**  $^{13}\text{C-NMR}$  Spectrum (101 MHz,  $\text{CDCl}_3$ ) of **1g**

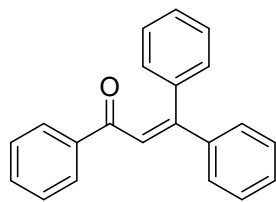

**1,3,3-Triphenylprop-2-en-1-one (1h)**<sup>2</sup>:  $R_f = 0.25$  (Petroleum ether/EtOAc, 50:1). 17.9 mg, 11% yield. Yellow liquid. <sup>1</sup>H NMR (400 MHz, Chloroform-*d*)  $\delta$  7.72 – 7.70 (m, 2H), 7.30 – 7.25 (m, 1H), 7.21 – 7.15 (m, 7H), 7.08 – 7.05 (m, 3H), 7.00 – 6.97 (m, 2H), 6.92 (s, 1H). <sup>13</sup>C NMR (101 MHz, Chloroform-*d*)  $\delta$  192.7, 154.7, 141.4, 139.0, 138.3, 132.6, 132.5, 129.8, 129.3, 128.8, 128.6, 128.5, 128.4, 128.1, 124.1.

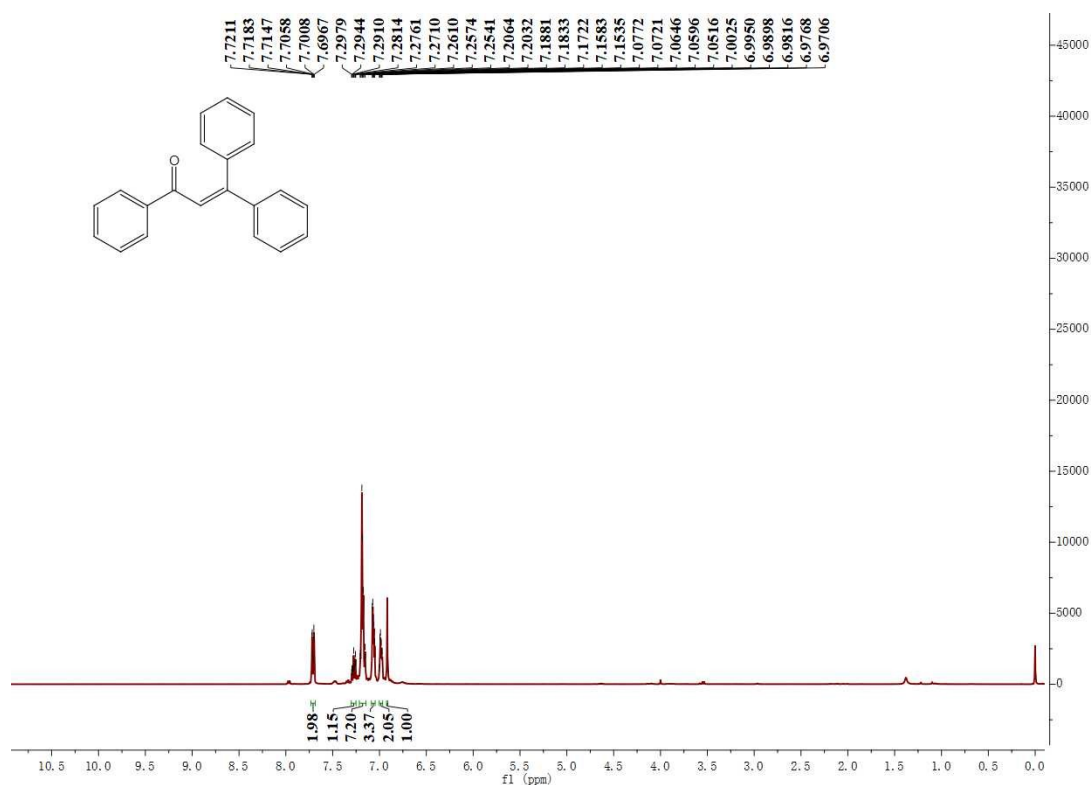

**Figure S3.** <sup>1</sup>H-NMR Spectrum (400 MHz, CDCl<sub>3</sub>) of **1h**

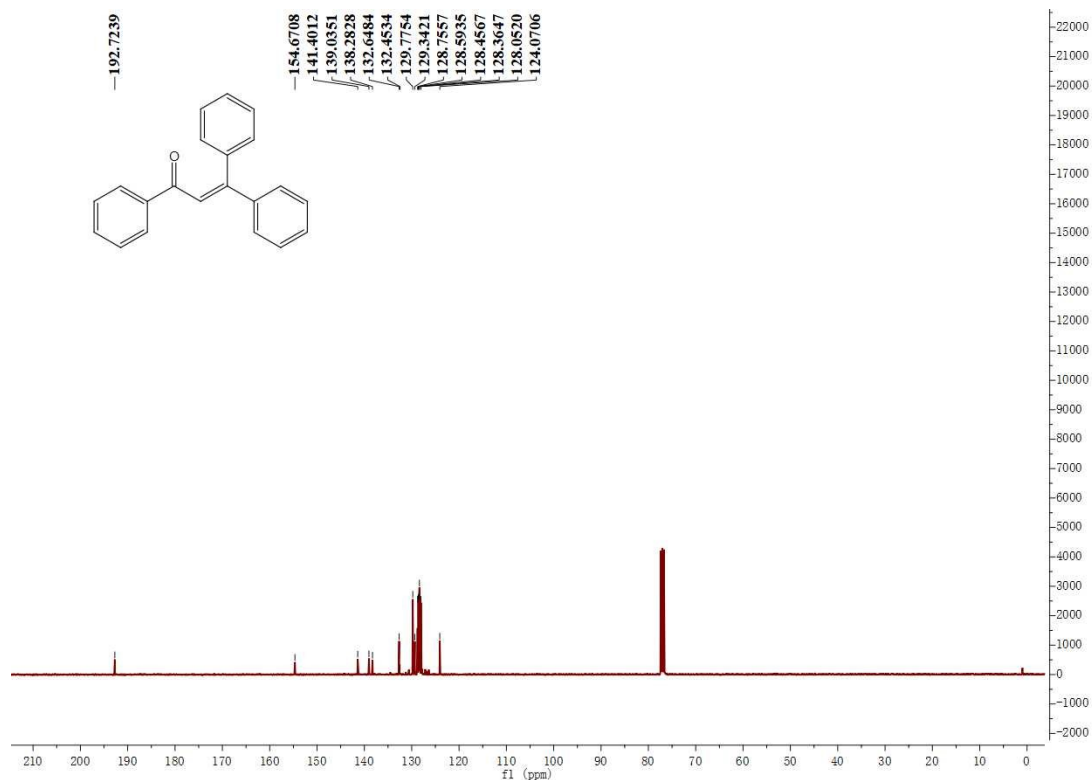

**Figure S4.**  $^{13}\text{C}$ -NMR Spectrum (101 MHz,  $\text{CDCl}_3$ ) of 1h

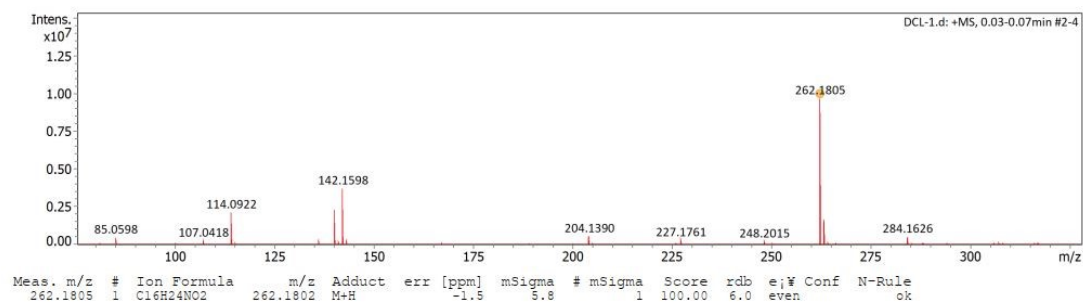

**Figure S5.** Mass spectrometry (HRMS) data of the radical trapping experiments (with TEMPO)

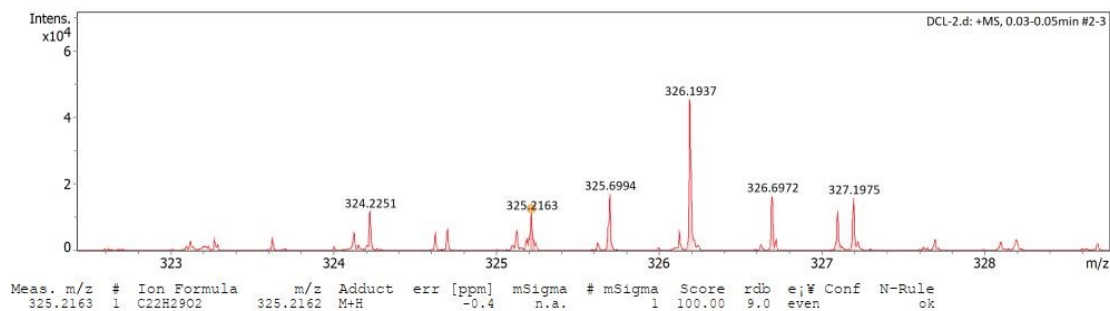

**Figure S6.** Mass spectrometry (HRMS) data of the radical trapping experiments (with BHT)

## 4.2 Emission spectrum of the LED light

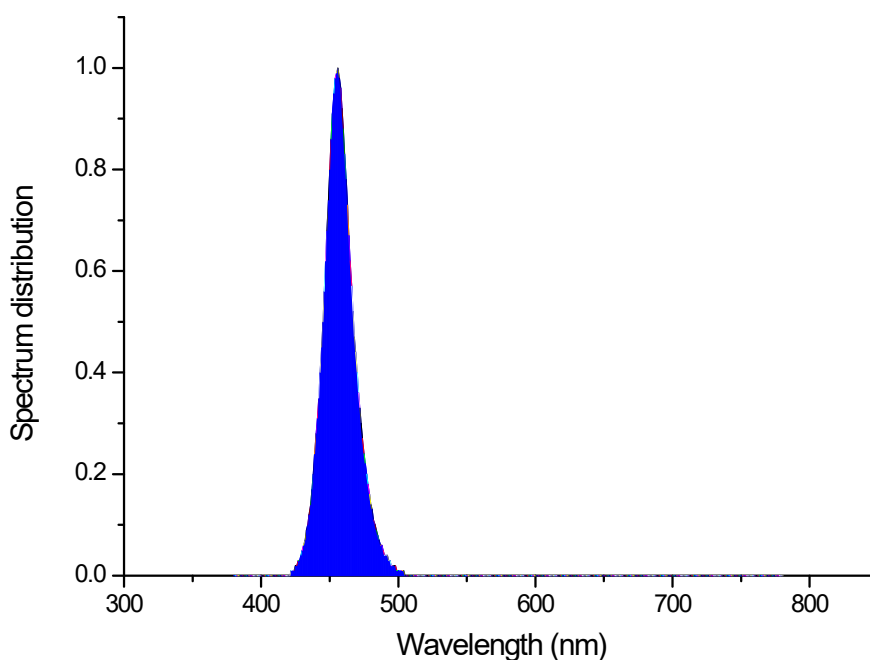

**Figure S7.** Spectrum distribution of light source.

**Table S8.** The detail information of light source.

|                              |                                                                                                                                   |                        |                                       |
|------------------------------|-----------------------------------------------------------------------------------------------------------------------------------|------------------------|---------------------------------------|
| Chromaticity Coordinates     | x=0.1459 y=0.0367 u=0.1854 v=0.1050                                                                                               |                        |                                       |
| Correlated Color Temperature | >25000 K                                                                                                                          | Peak wavelength        | 457 nm                                |
| SDCM                         | 0                                                                                                                                 | Main wavelength        | 460 nm                                |
| Color Shift                  | 0.000000 duv                                                                                                                      | Half-width of spectrum | 0 nm                                  |
| Red Ratio                    | 0                                                                                                                                 | Color purity           | 98.00%                                |
| Luminous Flux                | 2.680e <sup>2</sup> lux                                                                                                           | Radiant flux           | 5.7560e <sup>3</sup> W/m <sup>2</sup> |
| Color Rendering Index        | Ra=50.0 R1=14.0 R2=49.0 R3=99.0 R4=89.0 R5=0.0 R6=61.0<br>R7=54.0 R8=40.0 R9=99.0 R10=99.0 R11=99.0 R12=99.0 R13=35.0<br>R14=34.0 |                        |                                       |

## 4.3 The UV-Vis absorption spectrum

UV-Vis absorption spectra were collected on UV-2600 (SHIMADZU). All samples were dissolved in toluene. The UV-Vis absorption of *fac*-Ir(ppy)<sub>3</sub> (0.003 M), **1a** (0.1 M), **1b** (0.3

M), **c** (0.3 M), CuOAc (0.005 M) were showed in the figure below.

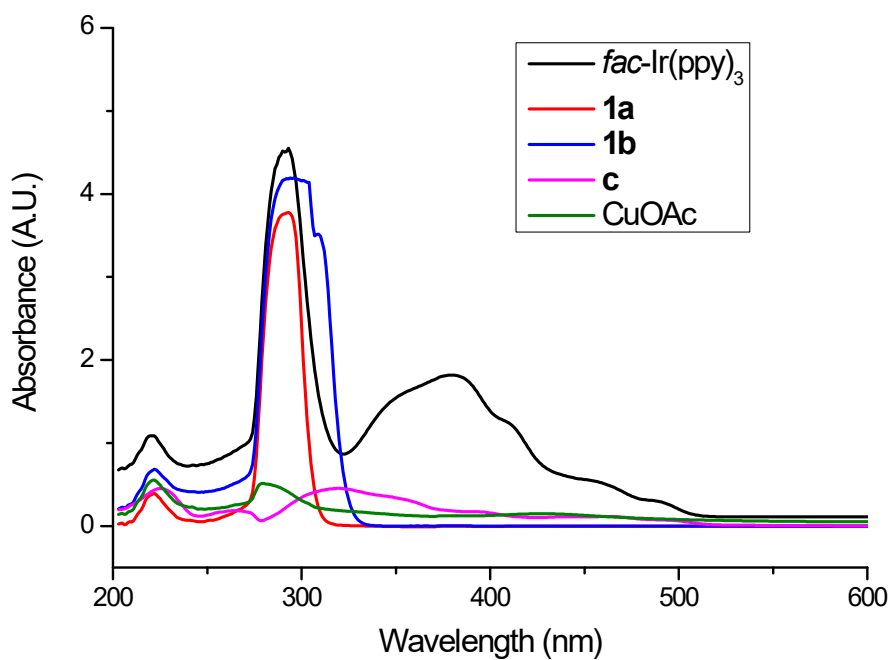

**Figure S8.** The UV-Vis absorption spectrum.

#### 4.4 Fluorescence quenching experiments

The quenching of *fac*-Ir(ppy)<sub>3</sub>\* by 4-methylstyrene **1a**, benzoyl chloride **1b**, TMSCN **c** were carried out in THF separately (Figures S9-S14). The results revealed that **1b** could significantly quench *fac*-Ir(ppy)<sub>3</sub>\*, and other components did not display obvious quenching ability to *fac*-Ir(ppy)<sub>3</sub>\* (excitation wavelength 452 nm; emission wavelength 513 nm).

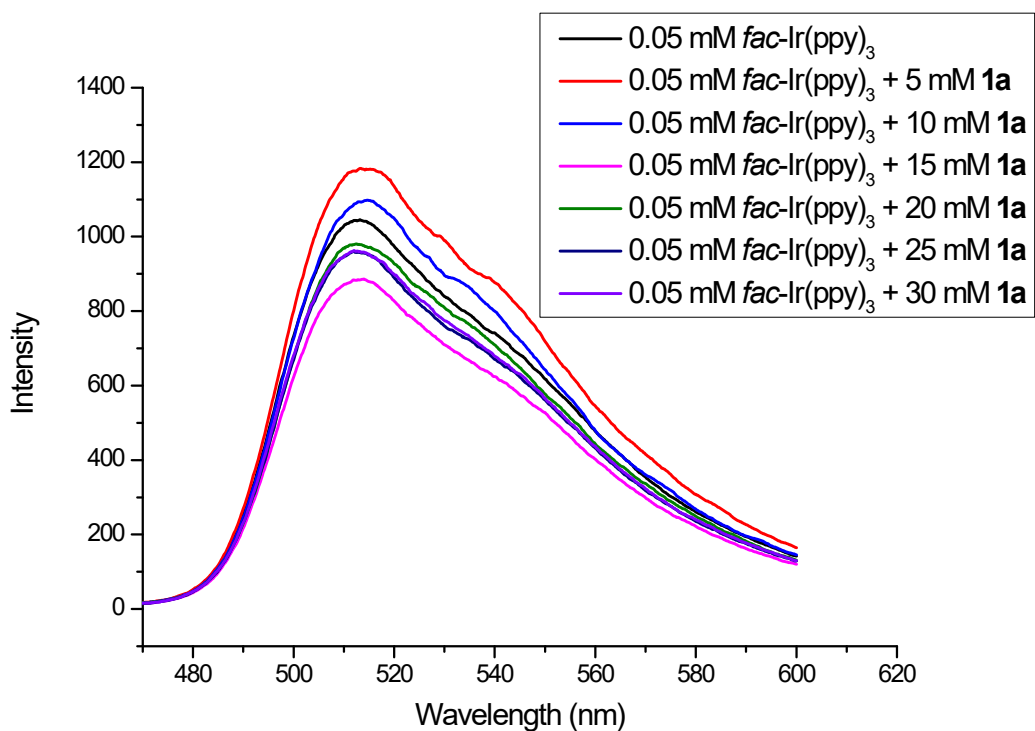

**Figure S9.** Fluorescence quenching of 0.05 mM *fac*-Ir(ppy)<sub>3</sub> (in THF) by increasing concentration of **1a**.

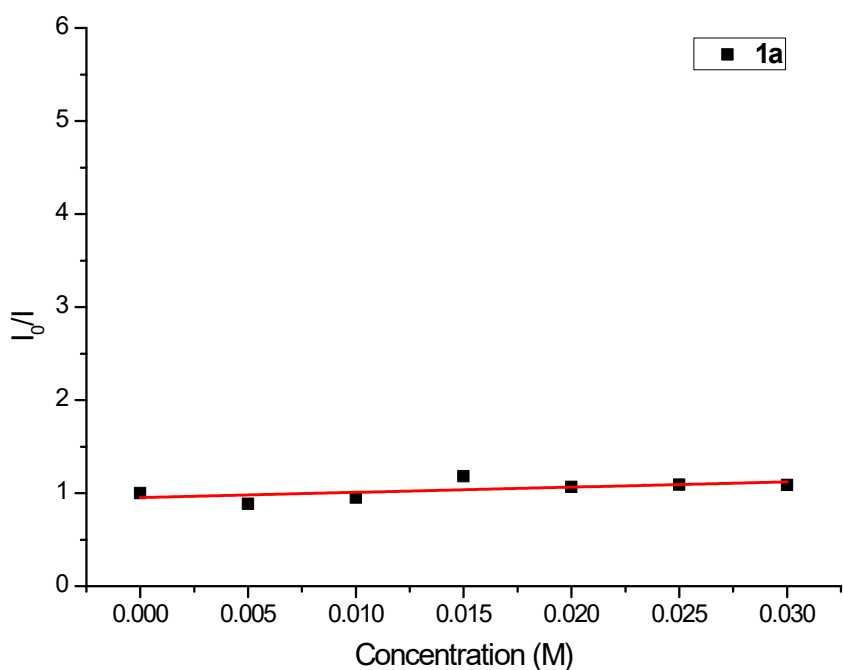

**Figure S10.** Stern–Volmer plots of fluorescence quenching of 0.05 mM *fac*-Ir(ppy)<sub>3</sub> (in THF) by **1a**.

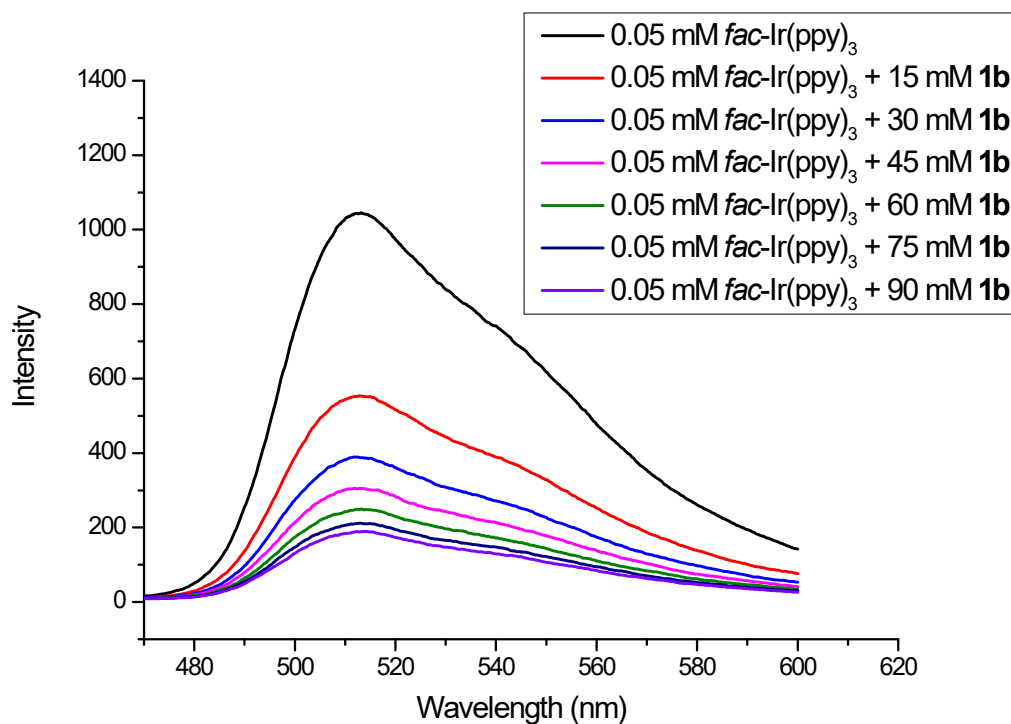

**Figure S11.** Fluorescence quenching of 0.05 mM *fac*-Ir(ppy)<sub>3</sub> (in THF) by increasing concentration of **1b**.

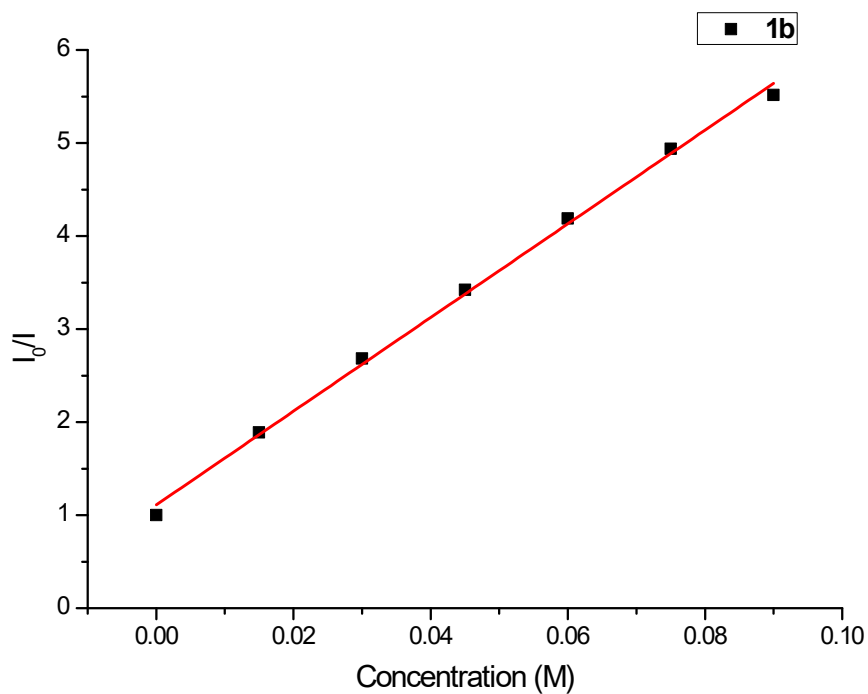

**Figure S12.** Stern–Volmer plots of fluorescence quenching of 0.05 mM *fac*-Ir(ppy)<sub>3</sub> (in THF) by **1b**.

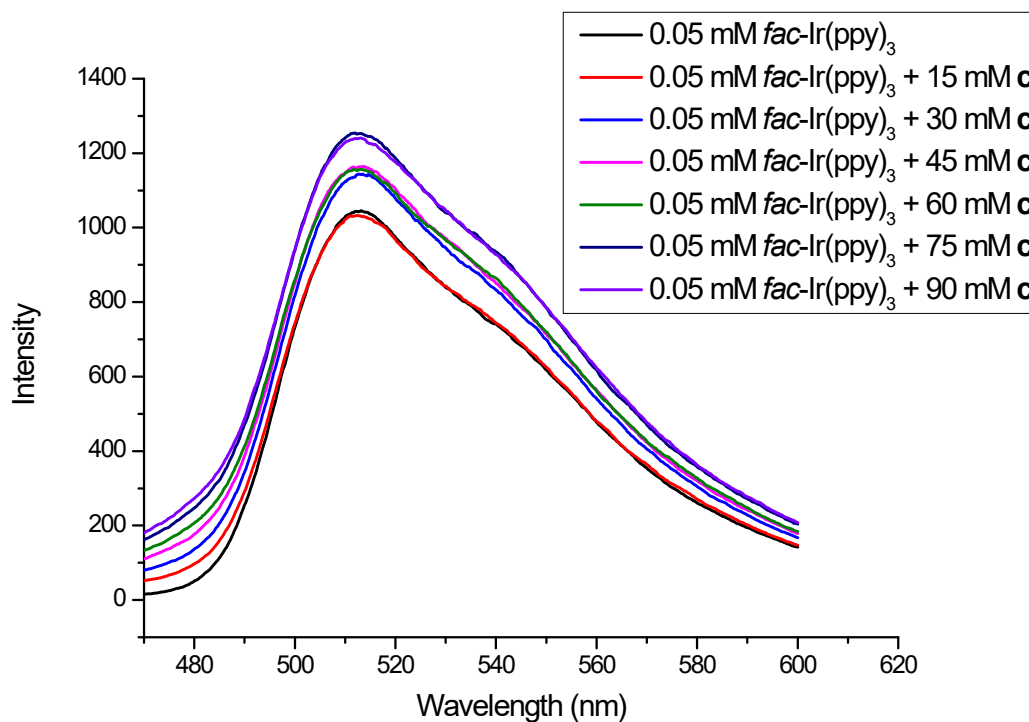

**Figure S13.** Fluorescence quenching of 0.05 mM *fac*-Ir(ppy)<sub>3</sub> (in THF) by increasing concentration of **c**.

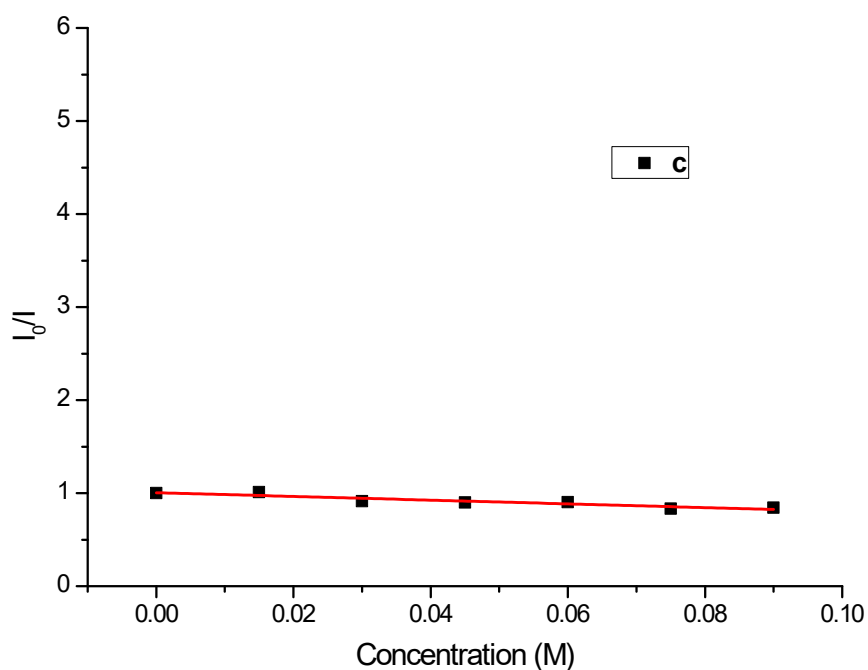

**Figure S14.** Stern–Volmer plots of fluorescence quenching of 0.05 mM *fac*-Ir(ppy)<sub>3</sub> (in THF) by **c**.



#### 4.5 Cyclic voltammetry experiments

The cyclic voltammetry experiments were performed separately. The reduction potential of **1a**, **1b**, **c** and CuOAc/**L4** were determined as: **1a** ( $E_{\text{red}} = -2.42 \text{ V vs SCE}$  in MeCN), **1b** ( $E_{\text{red}} = -1.15 \text{ V vs SCE}$  in MeCN), **c** ( $E_{\text{red}} = -2.07 \text{ V vs SCE}$  in MeCN) (Figure S15), **L4** ( $E_{\text{red}} = -1.91 \text{ V vs SCE}$  in MeCN), CuOAc/**L4** ( $E_{\text{red}} = -1.91 \text{ V vs SCE}$  in MeCN) (Figure S16), while the reduction peak of CuOAc were not detected obviously. The data indicated that **1b** can be reduced by the excited *fac*-Ir(ppy)<sub>3</sub>\* ( $E_{\text{ox}}^* = -1.73 \text{ V vs SCE}$  in MeCN).<sup>3</sup> The electrochemical measurements were carried out by a computer-controlled electrochemical analyzer. Cyclic voltammetry was performed in a three-electrode cell (volume 10 mL; MeCN as solvent, *n*Bu<sub>4</sub>N<sup>+</sup>ClO<sub>4</sub><sup>-</sup> 0.05 M as the supporting electrolyte, 10 mM concentration of **1a**, **1b** and **c**, 1.0 mM concentration of CuOAc and 2.0 mM concentration of **L4**) with glassy carbon (diameter 3 mm) as the working electrode, Pt wire as the auxiliary electrode, and saturated calomel electrode (SCE) (3 M KCl) as the reference electrode. The scan speed was 100 mV·s<sup>-1</sup>. The potential ranges investigated for reductions of reaction components and blank were 0.0 to -3.0 V vs SCE (3 M KCl). As shown below,  $E_{\text{red}}$  of **1b** was determined to be -1.15 V vs SCE (in MeCN), which suggest that single electron reduction of **1b** by the excited *fac*-Ir(ppy)<sub>3</sub>\* is feasible ( $E_{\text{ox}}^* = -1.73 \text{ V vs SCE}$  in MeCN).<sup>3</sup>

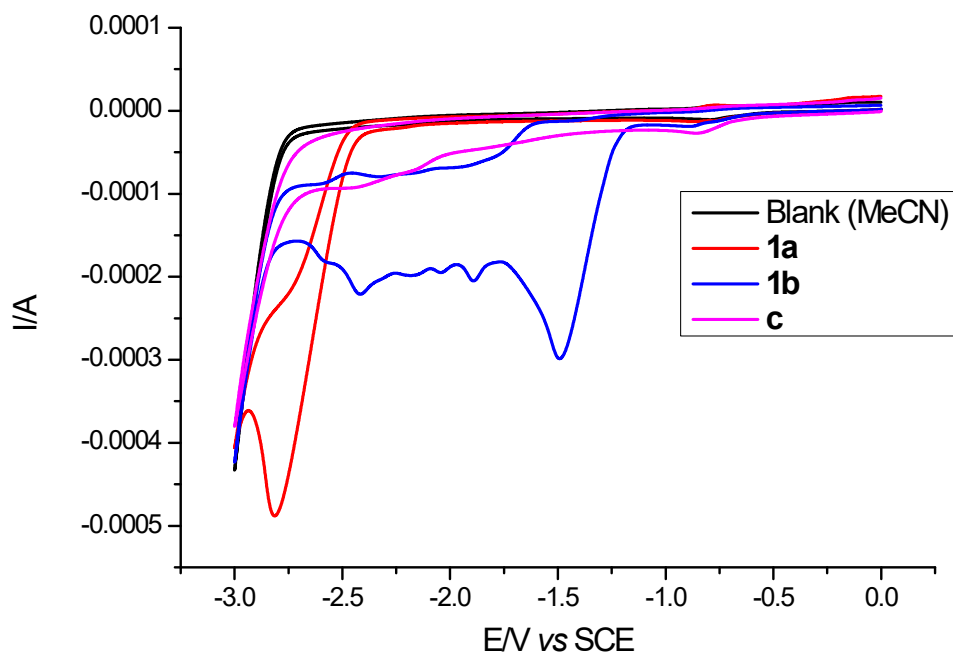

**Figure S15.** Cyclic voltammetry (CV) of 4-methylstyrene **1a**, benzoyl chloride **1b**, TMSCN **c** and MeCN.

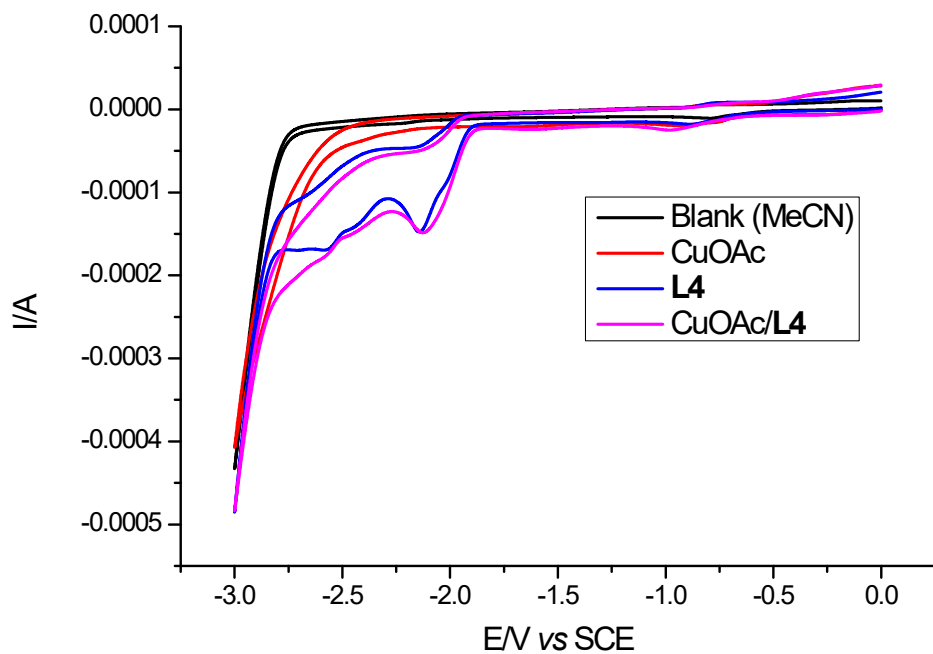

**Figure S16.** Cyclic voltammetry (CV) of CuOAc, L4, CuOAc/L4 and MeCN.

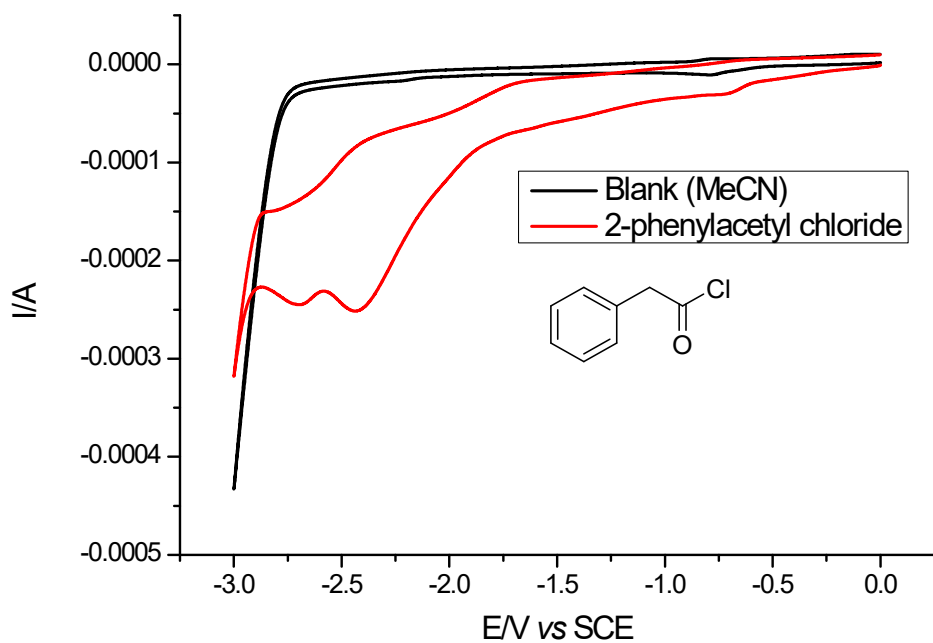

**Figure S17.** Cyclic voltammetry (CV) of 2-phenylacetyl chloride.

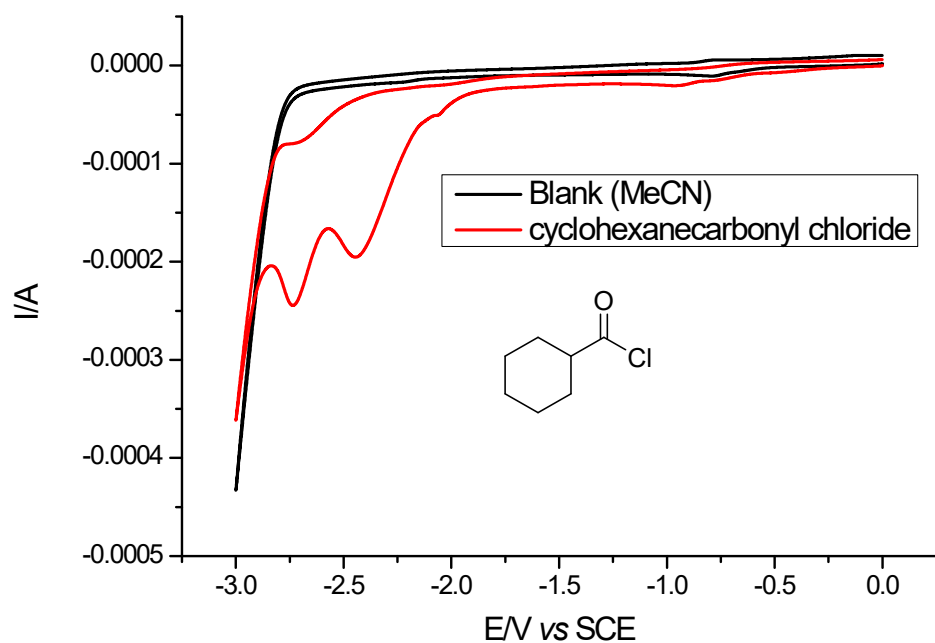

**Figure S18.** Cyclic voltammetry (CV) of cyclohexanecarbonyl chloride.

## 5. The enantioselective acylcyanation of 4-methylstyrene **1a**<sup>a</sup>

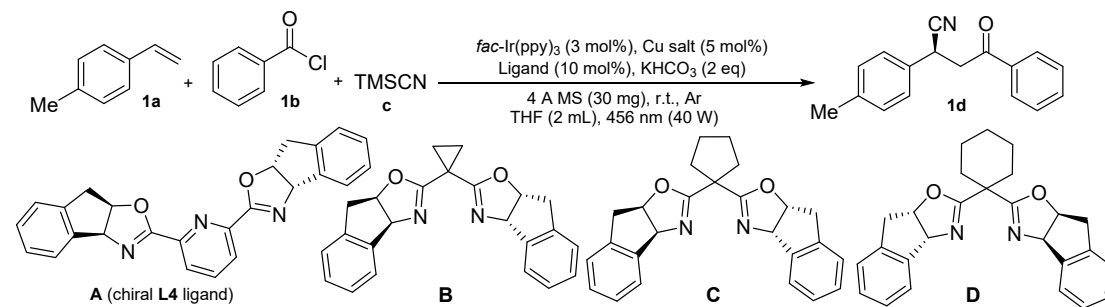

| Entry          | Cu salts                              | Ligand   | Yield (%) <sup>b</sup> | Ee (%) <sup>c</sup> |
|----------------|---------------------------------------|----------|------------------------|---------------------|
| 1              | CuOAc                                 | <b>A</b> | 80                     | 4                   |
| 2              | Cu(MeCN) <sub>4</sub> BF <sub>4</sub> | <b>A</b> | 55                     | 3                   |
| 3 <sup>d</sup> | CuOAc                                 | <b>A</b> | 79                     | 1                   |
| 4              | CuOAc                                 | <b>B</b> | 16                     | 86                  |
| 5              | Cu(MeCN) <sub>4</sub> BF <sub>4</sub> | <b>B</b> | 27                     | 83                  |
| 6              | CuCl                                  | <b>B</b> | 11                     | 87                  |
| 7 <sup>d</sup> | CuCl                                  | <b>B</b> | 18                     | 81                  |
| 8              | CuOAc                                 | <b>C</b> | 13                     | 83                  |
| 9              | Cu(MeCN) <sub>4</sub> BF <sub>4</sub> | <b>C</b> | 15                     | 80                  |
| 10             | Cu(MeCN) <sub>4</sub> BF <sub>4</sub> | <b>D</b> | 5                      | -45                 |

<sup>a</sup>Unless otherwise noted, conditions: **1a** (0.2 mmol, 1.0 equiv), **1b** (0.6 mmol, 3 equiv), **c** (0.6 mmol, 3.0 equiv), *fac*-Ir(ppy)<sub>3</sub> (0.006 mmol, 3 mol%), Cu salt (0.01 mmol, 5 mol%), ligand (0.02 mmol, 10 mol%), KHCO<sub>3</sub> (0.4 mmol, 2 equiv) and 4Å MS powder (30 mg) in THF (2 mL) irradiated with 40 W 456 nm Kessil Tuna blue lamp under Ar atmosphere (Ar balloon) at room temperature. <sup>b</sup>Isolated yield. <sup>c</sup>Determined by HPLC analysis with a chiral column (Daicel Chiralpak OD-H, hexane/isopropanol = 70:30, flow rate 1.0 mL/min, λ = 254 nm) and the absolute configuration of products **1d** was assigned by comparison with reported chiral HPLC analysis. <sup>d</sup>Toluene instead of THF.

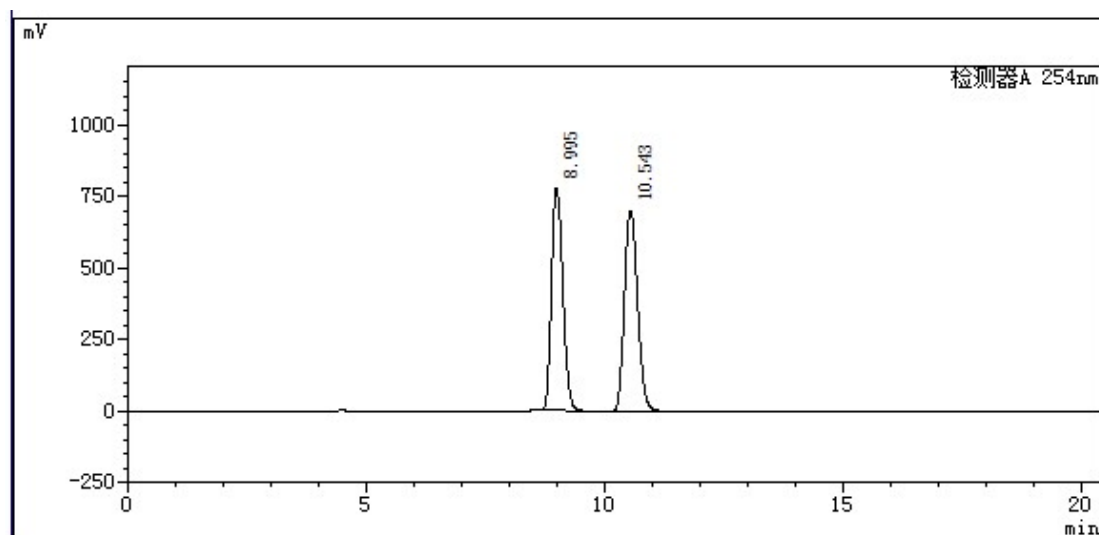

| 检测器A 254nm |                |          |         |               |
|------------|----------------|----------|---------|---------------|
| No.        | Retention Time | Area     | Height  | Concentration |
| 1          | 8.995          | 12737850 | 773837  | 48.601        |
| 2          | 10.543         | 13471384 | 698104  | 51.399        |
| 总计         |                | 26209234 | 1471941 |               |

**Figure S19.** HPLC of **1d** (racemate)

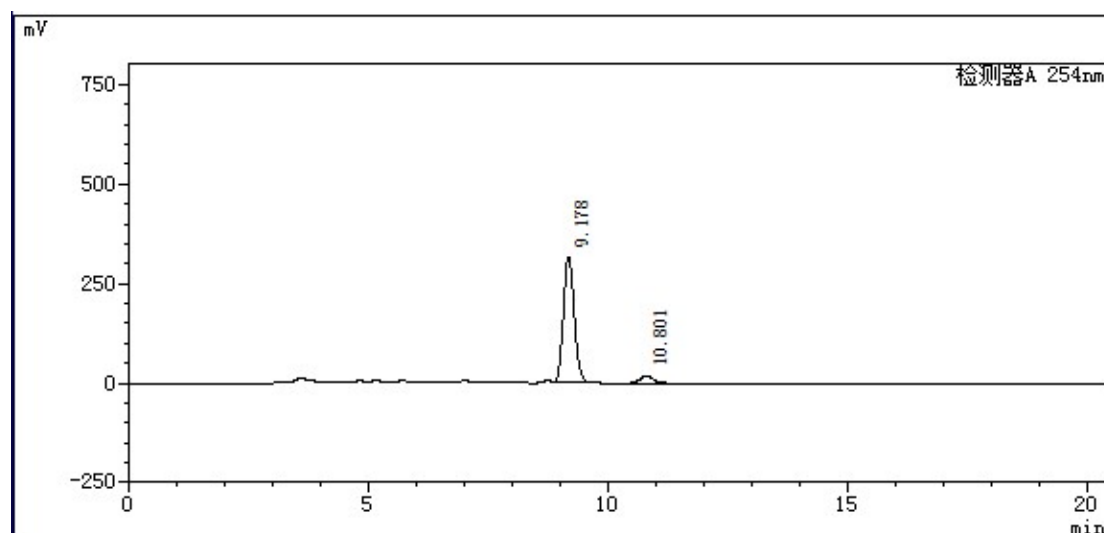

| 检测器A 254nm |                |         |        |               |
|------------|----------------|---------|--------|---------------|
| No.        | Retention Time | Area    | Height | Concentration |
| 1          | 9.178          | 4898346 | 313899 | 93.251        |
| 2          | 10.801         | 354538  | 19550  | 6.749         |
| 总计         |                | 5252884 | 333448 |               |

Figure S20. HPLC of **1d** (chiral)

## 6. Characterization data of the products

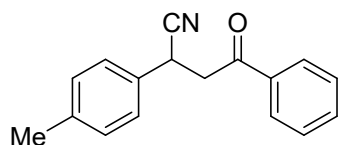

**4-Oxo-4-phenyl-2-(p-tolyl)butanenitrile (1d)**<sup>4</sup>:  $R_f = 0.25$  (Petroleum ether/EtOAc, 15:1). 37.4 mg, 76% yield. White solid.  $^1\text{H NMR}$  (600 MHz, Chloroform-*d*)  $\delta$  7.91 (d,  $J = 7.4$  Hz, 2H), 7.58 (t,  $J = 7.4$  Hz, 1H), 7.46 (t,  $J = 7.6$  Hz, 2H), 7.31 (d,  $J = 7.7$  Hz, 2H), 7.18 (d,  $J = 7.8$  Hz, 2H), 4.53 (t,  $J = 6.9$  Hz, 1H), 3.69 (dd,  $J = 17.8, 7.8$  Hz, 1H), 3.48 (dd,  $J = 17.8, 6.1$  Hz, 1H), 2.34 (s, 3H).  $^{13}\text{C NMR}$  (151 MHz, Chloroform-*d*)  $\delta$  194.7, 138.2, 135.9, 133.8, 132.3, 129.9, 128.8, 128.1, 127.3, 120.7, 44.5, 31.6, 21.0.

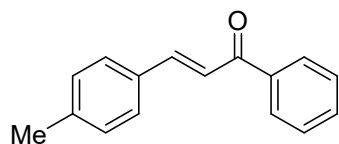

**(E)-1-Phenyl-3-(p-tolyl)prop-2-en-1-one (1e)**<sup>5</sup>:  $R_f = 0.25$  (Petroleum ether/EtOAc, 75:1). Light yellow solid.  $^1\text{H NMR}$  (600 MHz, Chloroform-*d*)  $\delta$  8.01 – 8.00 (m, 2H), 7.79 (d,  $J = 15.7$  Hz, 1H), 7.59 – 7.53 (m, 3H), 7.51 – 7.47 (m, 3H), 7.22 (d,  $J = 7.8$  Hz, 2H), 2.39 (s, 3H).  $^{13}\text{C NMR}$  (151 MHz, Chloroform-*d*)  $\delta$  190.7, 144.9, 141.0, 138.5, 132.6, 132.3, 129.7, 128.6, 128.5, 121.3, 21.5.

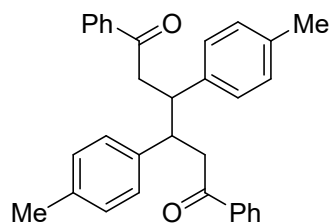

**1,6-Diphenyl-3,4-di-p-tolylhexane-1,6-dione (1f)**:  $R_f = 0.25$  (Petroleum ether/EtOAc, 16:1). White solid.  $^1\text{H NMR}$  (600 MHz, Chloroform-*d*)  $\delta$  7.65 – 7.63 (m, 4H), 7.46 – 7.43 (m, 2H), 7.32 (t,  $J = 7.8$  Hz, 4H), 7.24 (d,  $J = 7.8$  Hz, 4H), 7.07 (d,  $J = 7.7$  Hz, 4H), 3.64 – 3.63 (m, 2H), 3.26 – 3.22 (m, 2H), 2.92 (dd,  $J = 16.6, 2.3$  Hz, 2H), 2.26 (s, 6H).  $^{13}\text{C NMR}$  (151 MHz,

CDCl<sub>3</sub>)  $\delta$  199.0, 139.8, 137.2, 136.3, 132.6, 129.4, 128.3, 128.2, 127.9, 46.7, 44.1, 21.0.

HRMS (ESI)  $m/z$ :  $[M + H]^+$  Calcd for C<sub>32</sub>H<sub>31</sub>O<sub>2</sub> 447.2319; Found 447.2322.

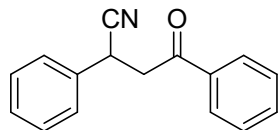

**4-Oxo-2,4-diphenylbutanenitrile (2d)**<sup>4</sup>:  $R_f$  = 0.25 (Petroleum ether/EtOAc, 15:1). 37.0 mg, 79% yield. Yellow solid. <sup>1</sup>H NMR (400 MHz, Chloroform-*d*)  $\delta$  7.93 – 7.91 (m, 2H), 7.61 – 7.57 (m, 1H), 7.48 – 7.42 (m, 4H), 7.41 – 7.37 (m, 2H), 7.35 – 7.31 (m, 1H), 4.56 (dd,  $J$  = 8.0, 5.9 Hz, 1H), 3.73 (dd,  $J$  = 18.0, 8.0 Hz, 1H), 3.51 (dd,  $J$  = 17.9, 6.0 Hz, 1H). <sup>13</sup>C NMR (101 MHz, Chloroform-*d*)  $\delta$  194.6, 135.7, 135.3, 133.9, 129.3, 128.8, 128.4, 128.1, 127.5, 120.6, 44.5, 31.9.

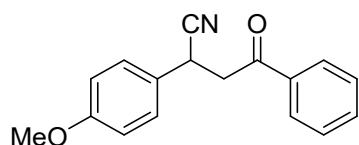

**2-(4-Methoxyphenyl)-4-oxo-4-phenylbutanenitrile (3d)**<sup>4</sup>:  $R_f$  = 0.25 (Petroleum ether/EtOAc, 9:1). 26.5 mg, 50% yield. Yellow solid. <sup>1</sup>H NMR (400 MHz, Chloroform-*d*)  $\delta$  7.93 – 7.91 (m, 2H), 7.61 – 7.59 (m, 1H), 7.48 – 7.45 (m, 2H), 7.36 – 7.33 (m, 2H), 6.92 – 6.88 (m, 2H), 4.52 (dd,  $J$  = 7.7, 6.3 Hz, 1H), 3.80 (s, 3H), 3.69 (dd,  $J$  = 17.9, 7.7 Hz, 1H), 3.49 (dd,  $J$  = 17.9, 6.3 Hz, 1H). <sup>13</sup>C NMR (101 MHz, Chloroform-*d*)  $\delta$  194.8, 159.6, 135.8, 133.9, 128.8, 128.7, 128.1, 127.2, 120.9, 114.6, 55.4, 44.6, 31.2.

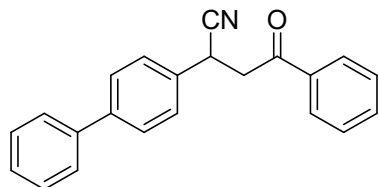

**2-([1,1'-Biphenyl]-4-yl)-4-oxo-4-phenylbutanenitrile (4d)**<sup>6</sup>:  $R_f$  = 0.25 (Petroleum ether/EtOAc, 15:1). 39.2 mg, 63% yield. Light yellow solid. <sup>1</sup>H NMR (400 MHz, Chloroform-*d*)  $\delta$  7.95 – 7.92 (m, 2H), 7.61 – 7.55 (m, 5H), 7.52 – 7.42 (m, 6H), 7.38 – 7.33 (m, 1H), 4.61 (dd,  $J$  = 7.8, 6.1 Hz, 1H), 3.75 (dd,  $J$  = 17.9, 7.8 Hz, 1H), 3.55 (dd,  $J$  = 17.9, 6.1

Hz, 1H).  $^{13}\text{C}$  NMR (101 MHz, Chloroform-*d*)  $\delta$  194.6, 141.4, 140.2, 135.7, 134.2, 133.9, 128.9, 128.9, 128.1, 128.0, 127.7, 127.1, 120.6, 44.5, 31.6.

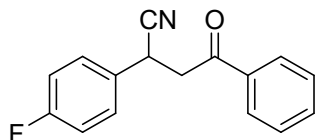

**2-(4-Fluorophenyl)-4-oxo-4-phenylbutanenitrile (5d)**<sup>4</sup>:  $R_f = 0.25$  (Petroleum ether/EtOAc, 13:1). 37.5 mg, 74% yield. White solid.  $^1\text{H}$  NMR (400 MHz, Chloroform-*d*)  $\delta$  7.92 (d,  $J = 7.7$  Hz, 2H), 7.60 (t,  $J = 7.4$  Hz, 1H), 7.47 (t,  $J = 7.7$  Hz, 2H), 7.44 – 7.40 (m, 2H), 7.07 (t,  $J = 8.5$  Hz, 2H), 4.57 (t,  $J = 6.9$  Hz, 1H), 3.71 (dd,  $J = 17.9, 7.4$  Hz, 1H), 3.51 (dd,  $J = 17.9, 6.4$  Hz, 1H).  $^{13}\text{C}$  NMR (101 MHz, Chloroform-*d*)  $\delta$  194.4, 162.5 (d,  $J = 247.9$  Hz), 135.6, 133.9, 131.1 (d,  $J = 3.4$  Hz), 129.3 (d,  $J = 8.3$  Hz), 128.8, 128.1, 120.5, 116.2 (d,  $J = 21.9$  Hz), 44.4, 31.2.  $^{19}\text{F}$  NMR (376 MHz, Chloroform-*d*)  $\delta$  -113.22.

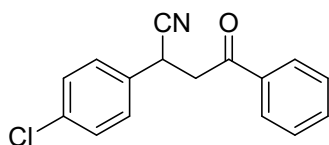

**2-(4-Chlorophenyl)-4-oxo-4-phenylbutanenitrile (6d)**<sup>4</sup>:  $R_f = 0.25$  (Petroleum ether/EtOAc, 13:1). 36.8 mg, 68% yield. Light yellow solid.  $^1\text{H}$  NMR (400 MHz, Chloroform-*d*)  $\delta$  7.91 (d,  $J = 7.8$  Hz, 2H), 7.60 (t,  $J = 7.4$  Hz, 1H), 7.47 (t,  $J = 7.6$  Hz, 2H), 7.40 – 7.35 (m, 4H), 4.56 (t,  $J = 6.9$  Hz, 1H), 3.71 (dd,  $J = 18.0, 7.4$  Hz, 1H), 3.51 (dd,  $J = 17.9, 6.4$  Hz, 1H).  $^{13}\text{C}$  NMR (101 MHz, Chloroform-*d*)  $\delta$  194.6, 135.8, 134.7, 134.3, 134.1, 129.7, 129.2, 129.1, 128.3, 120.5, 44.5, 31.6.

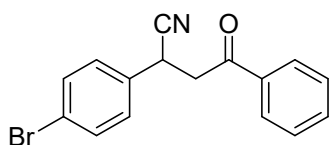

**2-(4-Bromophenyl)-4-oxo-4-phenylbutanenitrile (7d)**<sup>4</sup>:  $R_f = 0.25$  (Petroleum ether/EtOAc, 11:1). 38.4 mg, 61% yield. Light yellow solid.  $^1\text{H}$  NMR (400 MHz, Chloroform-*d*)  $\delta$  7.91 (d,  $J = 7.7$  Hz, 2H), 7.60 (t,  $J = 7.4$  Hz, 1H), 7.52 – 7.45 (m, 4H), 7.32 (d,  $J = 8.1$  Hz, 2H), 4.54 (t,  $J = 6.9$  Hz, 1H), 3.71 (dd,  $J = 18.0, 7.4$  Hz, 1H), 3.50 (dd,  $J = 18.0, 6.4$  Hz, 1H).  $^{13}\text{C}$  NMR

(101 MHz, Chloroform-*d*)  $\delta$  194.3, 135.5, 134.3, 134.0, 132.4, 129.3, 128.9, 128.1, 122.5, 120.2, 44.2, 31.4.

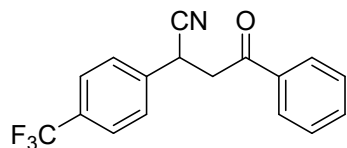

**4-Oxo-4-phenyl-2-(4-(trifluoromethyl)phenyl)butanenitrile (8d)**<sup>7</sup>:  $R_f = 0.25$  (Petroleum ether/EtOAc, 10:1). 46.8 mg, 77% yield. Light yellow solid. <sup>1</sup>H NMR (400 MHz, Chloroform-*d*)  $\delta$  7.93 – 7.91 (m, 2H), 7.66 (d,  $J = 8.2$  Hz, 2H), 7.63 – 7.58 (m, 3H), 7.48 (t,  $J = 7.8$  Hz, 2H), 4.66 (t,  $J = 6.8$  Hz, 1H), 3.76 (dd,  $J = 18.0, 7.3$  Hz, 1H), 3.55 (dd,  $J = 18.0, 6.5$  Hz, 1H). <sup>13</sup>C NMR (101 MHz, Chloroform-*d*)  $\delta$  194.1, 139.3, 135.5, 134.1, 130.8 (q,  $J = 32.7$  Hz), 128.9, 128.1, 128.1, 126.3 (q,  $J = 3.8$  Hz), 123.7 (q,  $J = 272.2$  Hz), 119.9, 44.2, 31.7. <sup>19</sup>F NMR (376 MHz, Chloroform-*d*)  $\delta$  -62.77.

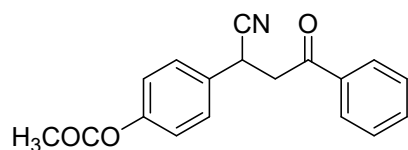

**4-(1-Cyano-3-oxo-3-phenylpropyl)phenyl acetate (9d)**<sup>6</sup>:  $R_f = 0.25$  (Petroleum ether/EtOAc, 2:1). 46.9 mg, 80% yield. Light yellow solid. <sup>1</sup>H NMR (400 MHz, Chloroform-*d*)  $\delta$  7.91 (d,  $J = 7.7$  Hz, 2H), 7.59 (t,  $J = 7.4$  Hz, 1H), 7.49 – 7.44 (m, 4H), 7.12 (d,  $J = 8.3$  Hz, 2H), 4.59 – 4.56 (m, 1H), 3.72 (dd,  $J = 18.0, 7.8$  Hz, 1H), 3.50 (dd,  $J = 18.0, 6.0$  Hz, 1H), 2.30 (s, 3H). <sup>13</sup>C NMR (101 MHz, Chloroform-*d*)  $\delta$  194.5, 169.2, 150.6, 135.6, 134.0, 132.8, 128.9, 128.7, 128.1, 122.5, 120.4, 44.5, 31.4, 21.1.

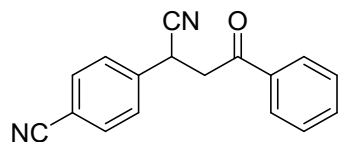

**4-(1-Cyano-3-oxo-3-phenylpropyl)benzonitrile (10d)**:  $R_f = 0.25$  (Petroleum ether/EtOAc, 5:1). 25.4 mg, 49% yield. White solid. <sup>1</sup>H NMR (400 MHz, Chloroform-*d*)  $\delta$  7.93 – 7.90 (m, 2H), 7.71 – 7.68 (m, 2H), 7.64 – 7.58 (m, 3H), 7.51 – 7.46 (m, 2H), 4.68 – 4.64 (m, 1H), 3.80 – 3.73 (m, 1H), 3.59 – 3.52 (m, 1H). <sup>13</sup>C NMR (101 MHz, Chloroform-*d*)  $\delta$  193.9, 140.4,



135.3, 134.2, 133.0, 129.0, 128.6, 128.1, 119.5, 118.0, 112.6, 43.9, 31.9. HRMS (ESI)  $m/z$ :  $[M + Na]^+$  Calcd for  $C_{17}H_{12}N_2ONa$  283.0842; Found 283.0847.

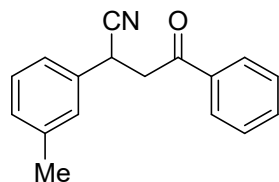

**4-Oxo-4-phenyl-2-(m-tolyl)butanenitrile (11d)**<sup>6</sup>:  $R_f = 0.25$  (Petroleum ether/EtOAc, 16:1). 31.4 mg, 63% yield. Light yellow solid.  $^1H$  NMR (400 MHz, Chloroform-*d*)  $\delta$  7.94 – 7.91 (m, 2H), 7.61 – 7.57 (m, 1H), 7.48 – 7.44 (m, 2H), 7.29 – 7.20 (m, 3H), 7.14 (d,  $J = 7.4$  Hz, 1H), 4.52 (dd,  $J = 8.1, 5.8$  Hz, 1H), 3.71 (dd,  $J = 17.9, 8.2$  Hz, 1H), 3.48 (dd,  $J = 17.9, 5.8$  Hz, 1H), 2.36 (s, 3H).  $^{13}C$  NMR (101 MHz, Chloroform-*d*)  $\delta$  194.7, 139.2, 135.8, 135.2, 133.9, 129.2, 129.1, 128.8, 128.1, 128.1, 124.5, 120.7, 44.6, 31.8, 21.4.

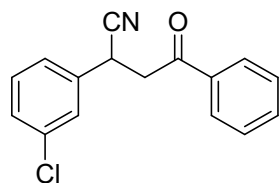

**2-(3-Chlorophenyl)-4-oxo-4-phenylbutanenitrile (12d)**<sup>8</sup>:  $R_f = 0.25$  (Petroleum ether/EtOAc, 15:1). 36.4 mg, 68% yield. Light yellow solid.  $^1H$  NMR (400 MHz, Chloroform-*d*)  $\delta$  7.94 – 7.91 (m, 2H), 7.62 – 7.58 (m, 1H), 7.50 – 7.44 (m, 3H), 7.35 – 7.31 (m, 3H), 4.56 (dd,  $J = 7.6, 6.1$  Hz, 1H), 3.73 (dd,  $J = 18.0, 7.6$  Hz, 1H), 3.51 (dd,  $J = 18.0, 6.2$  Hz, 1H).  $^{13}C$  NMR (101 MHz, Chloroform-*d*)  $\delta$  194.2, 137.2, 135.5, 135.1, 134.0, 130.5, 128.9, 128.7, 128.1, 127.8, 125.8, 120.1, 44.3, 31.5.

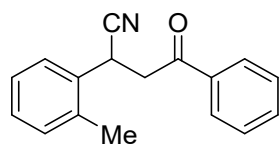

**4-Oxo-4-phenyl-2-(o-tolyl)butanenitrile (13d)**<sup>6</sup>:  $R_f = 0.25$  (Petroleum ether/EtOAc, 16:1). 18.4 mg, 37% yield. Light yellow liquid.  $^1H$  NMR (400 MHz, Chloroform-*d*)  $\delta$  7.96 – 7.93 (m, 2H), 7.63 – 7.58 (m, 1H), 7.51 – 7.46 (m, 3H), 7.27 – 7.25 (m, 2H), 7.23 – 7.20 (m, 1H),

4.71 (dd,  $J = 9.0, 5.0$  Hz, 1H), 3.74 (dd,  $J = 18.0, 9.1$  Hz, 1H), 3.42 (dd,  $J = 18.0, 5.0$  Hz, 1H), 2.42 (s, 3H).  $^{13}\text{C}$  NMR (101 MHz, Chloroform- $d$ )  $\delta$  194.8, 135.7, 135.3, 133.9, 133.4, 131.3, 128.9, 128.5, 128.1, 127.5, 127.0, 120.7, 43.1, 28.8, 19.3.

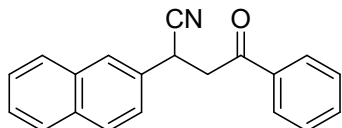

**2-(Naphthalen-2-yl)-4-oxo-4-phenylbutanenitrile (14d)**<sup>4</sup>:  $R_f = 0.25$  (Petroleum ether/EtOAc, 12:1). 35.2 mg, 62% yield. Light yellow solid. m. p. 122-123 °C.  $^1\text{H}$  NMR (400 MHz, Chloroform- $d$ )  $\delta$  7.93 – 7.91 (m, 3H), 7.88 – 7.82 (m, 3H), 7.60 – 7.56 (m, 1H), 7.52 – 7.43 (m, 5H), 4.74 (dd,  $J = 7.9, 5.9$  Hz, 1H), 3.80 (dd,  $J = 17.9, 7.9$  Hz, 1H), 3.59 (dd,  $J = 17.9, 6.0$  Hz, 1H).  $^{13}\text{C}$  NMR (101 MHz, Chloroform- $d$ )  $\delta$  194.6, 135.7, 133.9, 133.3, 132.9, 132.6, 129.3, 128.9, 128.1, 127.9, 127.7, 126.8, 126.8, 126.7, 124.8, 120.7, 44.5, 32.1.

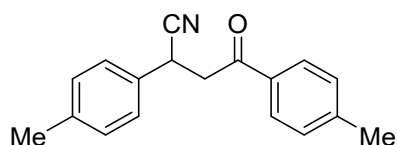

**4-Oxo-2,4-di-p-tolylbutanenitrile (15d)**<sup>9</sup>:  $R_f = 0.25$  (Petroleum ether/EtOAc, 20:1). 39.7 mg, 75% yield. Yellow solid.  $^1\text{H}$  NMR (600 MHz, Chloroform- $d$ )  $\delta$  7.82 – 7.81 (m, 2H), 7.31 (d,  $J = 8.0$  Hz, 2H), 7.26 – 7.25 (m, 3H), 7.18 (d,  $J = 7.7$  Hz, 2H), 4.52 (dd,  $J = 7.9, 6.1$  Hz, 1H), 3.67 (dd,  $J = 17.8, 7.9$  Hz, 1H), 3.45 (dd,  $J = 17.8, 6.1$  Hz, 1H), 2.41 (s, 3H), 2.34 (s, 3H).  $^{13}\text{C}$  NMR (101 MHz, Chloroform- $d$ )  $\delta$  194.3, 144.8, 138.2, 133.3, 132.4, 129.9, 129.5, 128.2, 127.4, 120.9, 44.4, 31.6, 21.7, 21.1.

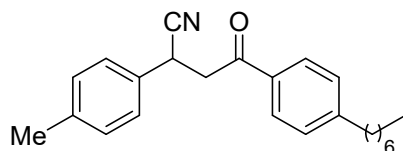

**4-(4-Heptylphenyl)-2-(4-methoxyphenyl)-4-oxobutanenitrile (16d)**:  $R_f = 0.25$  (Petroleum ether/EtOAc, 33:1). 45.8 mg, 69% yield. Yellow liquid.  $^1\text{H}$  NMR (600 MHz, Chloroform- $d$ )  $\delta$  7.86 (d,  $J = 7.8$  Hz, 2H), 7.34 (d,  $J = 7.6$  Hz, 2H), 7.29 – 7.28 (m, 2H), 7.21 (d,  $J = 7.7$  Hz, 2H), 4.56 (t,  $J = 7.0$  Hz, 1H), 3.70 (dd,  $J = 17.8, 7.8$  Hz, 1H), 3.49 (dd,  $J = 17.8, 6.1$  Hz, 1H), 2.68 (t,  $J = 7.7$  Hz, 2H), 2.37 (s, 3H), 1.66 – 1.63 (m, 2H), 1.35 – 1.28 (m, 8H), 0.91 (t,  $J =$

6.9 Hz, 3H).  $^{13}\text{C}$  NMR (101 MHz, Chloroform-*d*)  $\delta$  194.3, 149.8, 138.2, 133.5, 132.4, 129.9, 128.8, 128.2, 127.4, 120.9, 44.4, 36.0, 31.7, 31.6, 31.0, 29.2, 29.1, 22.6, 21.0, 14.0. HRMS (ESI)  $m/z$ :  $[\text{M} + \text{H}]^+$  Calcd for  $\text{C}_{24}\text{H}_{30}\text{NO}$  348.2322; Found 348.2322.

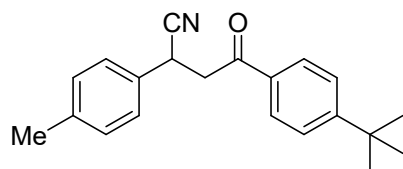

**4-(4-(Tert-butyl)phenyl)-2-(4-methoxyphenyl)-4-oxobutanenitrile (17d):**  $R_f = 0.25$  (Petroleum ether/EtOAc, 25:1). 36.6 mg, 60% yield. Yellow liquid.  $^1\text{H}$  NMR (400 MHz, Chloroform-*d*)  $\delta$  7.87 – 7.84 (m, 2H), 7.49 – 7.46 (m, 2H), 7.32 – 7.30 (m, 2H), 7.18 (d,  $J = 7.9$  Hz, 2H), 4.54 (dd,  $J = 7.7, 6.2$  Hz, 1H), 3.67 (dd,  $J = 17.8, 7.7$  Hz, 1H), 3.47 (dd,  $J = 17.8, 6.2$  Hz, 1H), 2.34 (s, 3H), 1.33 (s, 9H).  $^{13}\text{C}$  NMR (101 MHz, Chloroform-*d*)  $\delta$  194.3, 157.8, 138.2, 133.3, 132.4, 129.9, 128.1, 127.4, 125.8, 120.9, 44.4, 35.2, 31.5, 31.0, 21.0. HRMS (ESI)  $m/z$ :  $[\text{M} + \text{Na}]^+$  Calcd for  $\text{C}_{21}\text{H}_{23}\text{NONa}$  328.1672; Found 328.1670.

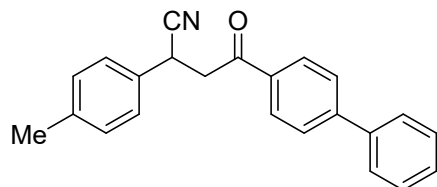

**4-([1,1'-Biphenyl]-4-yl)-2-(4-methoxyphenyl)-4-oxobutanenitrile (18d):**  $R_f = 0.25$  (Petroleum ether/EtOAc, 15:1). 33.8 mg, 52% yield. Yellow solid.  $^1\text{H}$  NMR (400 MHz, Chloroform-*d*)  $\delta$  8.00 – 7.98 (m, 2H), 7.70 – 7.67 (m, 2H), 7.62 – 7.60 (m, 2H), 7.49 – 7.44 (m, 2H), 7.43 – 7.38 (m, 1H), 7.36 – 7.32 (m, 2H), 7.20 (d,  $J = 7.9$  Hz, 2H), 4.55 (dd,  $J = 7.9, 6.1$  Hz, 1H), 3.73 (dd,  $J = 17.8, 7.9$  Hz, 1H), 3.51 (dd,  $J = 17.8, 6.1$  Hz, 1H), 2.35 (s, 3H).  $^{13}\text{C}$  NMR (101 MHz, Chloroform-*d*)  $\delta$  194.3, 146.6, 139.6, 138.3, 134.5, 132.3, 129.9, 129.0, 128.7, 128.5, 127.4, 127.4, 127.3, 120.8, 44.6, 31.6, 21.1. HRMS (ESI)  $m/z$ :  $[\text{M} + \text{H}]^+$  Calcd for  $\text{C}_{23}\text{H}_{20}\text{NO}$  326.1539; Found 326.1538.

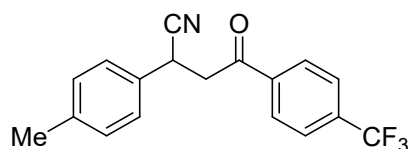

**2-(4-Methoxyphenyl)-4-oxo-4-(4-(trifluoromethyl)phenyl)butanenitrile (19d):**  $R_f = 0.25$  (Petroleum ether/EtOAc, 22:1). 37.1 mg, 59% yield. Light yellow solid.  $^1\text{H}$  NMR (400 MHz, Chloroform-*d*)  $\delta$  8.02 (d,  $J = 8.1$  Hz, 2H), 7.73 (d,  $J = 8.1$  Hz, 2H), 7.31 (d,  $J = 7.8$  Hz, 2H), 7.20 (d,  $J = 7.8$  Hz, 2H), 4.51 (dd,  $J = 8.0, 5.9$  Hz, 1H), 3.72 (dd,  $J = 17.9, 7.8$  Hz, 1H), 3.50 (dd,  $J = 18.0, 5.8$  Hz, 1H), 2.35 (s, 3H).  $^{13}\text{C}$  NMR (101 MHz, Chloroform-*d*)  $\delta$  193.9, 138.5, 138.4, 135.1 (q,  $J = 32.9$  Hz), 131.9, 130.0, 128.5, 127.3, 125.91 (q,  $J = 3.7$  Hz), 123.4 (q,  $J = 272.8$  Hz), 120.5, 44.8, 31.5, 21.0.  $^{19}\text{F}$  NMR (376 MHz, Chloroform-*d*)  $\delta$  -63.26. HRMS (ESI)  $m/z$ :  $[\text{M} + \text{Na}]^+$  Calcd for  $\text{C}_{18}\text{H}_{14}\text{F}_3\text{NONa}$  340.0920; Found 340.0920.

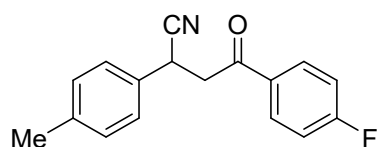

**4-(4-Fluorophenyl)-2-(4-methoxyphenyl)-4-oxobutanenitrile (20d):**  $R_f = 0.25$  (Petroleum ether/EtOAc, 20:1). 33.1 mg, 62% yield. White liquid.  $^1\text{H}$  NMR (600 MHz, Chloroform-*d*)  $\delta$  7.96 - 7.94 (m, 2H), 7.30 (d,  $J = 7.7$  Hz, 2H), 7.19 (d,  $J = 7.8$  Hz, 2H), 7.13 (t,  $J = 8.5$  Hz, 2H), 4.51 (t,  $J = 6.9$  Hz, 1H), 3.67 (dd,  $J = 17.8, 8.0$  Hz, 1H), 3.45 (dd,  $J = 17.8, 5.9$  Hz, 1H), 2.34 (s, 3H).  $^{13}\text{C}$  NMR (101 MHz, Chloroform-*d*)  $\delta$  193.2, 166.2 (d,  $J = 256.3$  Hz), 138.3, 132.2 (d,  $J = 3.0$  Hz), 132.1, 130.8 (d,  $J = 9.5$  Hz), 129.9, 127.3, 120.7, 116.0 (d,  $J = 22.1$  Hz), 44.5, 31.6, 21.1.  $^{19}\text{F}$  NMR (376 MHz, Chloroform-*d*)  $\delta$  -103.54. HRMS (ESI)  $m/z$ :  $[\text{M} + \text{Na}]^+$  Calcd for  $\text{C}_{17}\text{H}_{14}\text{FNONa}$  290.0952; Found 290.0951.

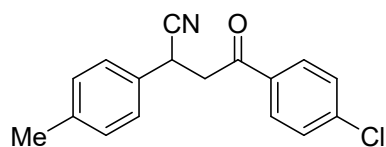

**4-(4-Chlorophenyl)-2-(4-methoxyphenyl)-4-oxobutanenitrile (21d):**  $R_f = 0.25$  (Petroleum ether/EtOAc, 30:1). 39.8 mg, 70% yield. White solid.  $^1\text{H}$  NMR (600 MHz, Chloroform-*d*)  $\delta$  7.85 (d,  $J = 8.3$  Hz, 2H), 7.43 (d,  $J = 8.8$  Hz, 2H), 7.30 (d,  $J = 7.6$  Hz, 2H), 7.19 (d,  $J = 7.8$  Hz, 2H), 4.50 (dd,  $J = 8.0, 5.9$  Hz, 1H), 3.66 (dd,  $J = 17.9, 7.9$  Hz, 1H), 3.44 (dd,  $J = 17.9, 5.9$  Hz,

1H), 2.34 (s, 3H). <sup>13</sup>C NMR (101 MHz, Chloroform-*d*) δ 193.6, 140.4, 138.4, 134.1, 132.1, 130.0, 129.5, 129.2, 127.3, 120.6, 44.5, 31.5, 21.1.

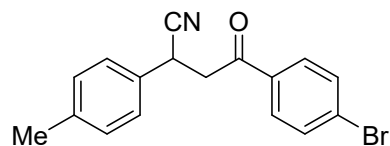

**4-(4-Bromophenyl)-2-(4-methoxyphenyl)-4-oxobutanenitrile (22d):**  $R_f = 0.25$  (Petroleum ether/EtOAc, 20:1). 40.7 mg, 62% yield. Light yellow solid. <sup>1</sup>H NMR (400 MHz, Chloroform-*d*) δ 7.77 (d,  $J = 8.6$  Hz, 2H), 7.60 (d,  $J = 8.6$  Hz, 2H), 7.30 (d,  $J = 8.1$  Hz, 2H), 7.19 (d,  $J = 7.9$  Hz, 2H), 4.49 (dd,  $J = 8.0, 6.0$  Hz, 1H), 3.66 (dd,  $J = 17.9, 8.0$  Hz, 1H), 3.44 (dd,  $J = 17.9, 6.0$  Hz, 1H), 2.34 (s, 3H). <sup>13</sup>C NMR (101 MHz, Chloroform-*d*) δ 193.8, 138.4, 134.5, 132.2, 132.1, 130.0, 129.6, 129.2, 127.3, 120.6, 44.5, 31.5, 21.1. HRMS (ESI)  $m/z$ :  $[M + Na]^+$  Calcd for C<sub>17</sub>H<sub>14</sub>BrNONa 350.0151; Found 350.0149.

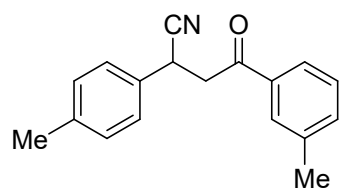

**2-(4-Methoxyphenyl)-4-oxo-4-(m-tolyl)butanenitrile (23d):**  $R_f = 0.25$  (Petroleum ether/EtOAc, 13:1). 38.2 mg, 73% yield. Yellow solid. <sup>1</sup>H NMR (400 MHz, Chloroform-*d*) δ 7.73 – 7.69 (m, 2H), 7.39 (d,  $J = 7.5$  Hz, 1H), 7.35 (d,  $J = 7.5$  Hz, 1H), 7.31 (d,  $J = 8.1$  Hz, 2H), 7.18 (d,  $J = 7.9$  Hz, 2H), 4.52 (dd,  $J = 7.9, 6.1$  Hz, 1H), 3.68 (dd,  $J = 17.9, 7.9$  Hz, 1H), 3.47 (dd,  $J = 17.9, 6.1$  Hz, 1H), 2.39 (s, 3H), 2.34 (s, 3H). <sup>13</sup>C NMR (101 MHz, Chloroform-*d*) δ 194.9, 138.7, 138.2, 135.8, 134.6, 132.4, 129.9, 128.7, 128.6, 127.4, 125.3, 120.8, 44.6, 31.6, 21.3, 21.0. HRMS (ESI)  $m/z$ :  $[M + Na]^+$  Calcd for C<sub>18</sub>H<sub>17</sub>NONa 286.1202; Found 286.1199.

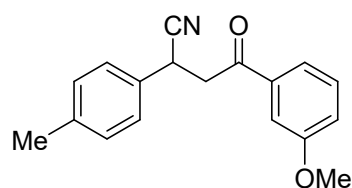

**4-(3-Methoxyphenyl)-2-(4-methoxyphenyl)-4-oxobutanenitrile (24d):**  $R_f = 0.25$

(Petroleum ether/EtOAc, 10:1). 42.5 mg, 76% yield. Light yellow liquid.  $^1\text{H}$  NMR (400 MHz, Chloroform-*d*)  $\delta$  7.48 – 7.44 (m, 2H), 7.37 – 7.30 (m, 3H), 7.20 – 7.18 (m, 2H), 7.14 – 7.11 (m, 1H), 4.51 (dd,  $J = 7.9, 6.0$  Hz, 1H), 3.84 (s, 3H), 3.68 (dd,  $J = 17.9, 7.9$  Hz, 1H), 3.47 (dd,  $J = 17.9, 6.1$  Hz, 1H), 2.34 (s, 3H).  $^{13}\text{C}$  NMR (101 MHz, Chloroform-*d*)  $\delta$  194.6, 160.0, 138.3, 137.1, 132.3, 129.9, 129.8, 127.4, 120.8, 120.6, 120.4, 112.3, 55.5, 44.6, 31.6, 21.1. HRMS (ESI)  $m/z$ :  $[\text{M} + \text{Na}]^+$  Calcd for  $\text{C}_{18}\text{H}_{17}\text{NO}_2\text{Na}$  302.1151; Found 302.1148.

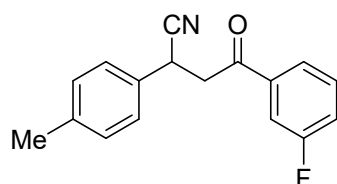

**4-(3-Fluorophenyl)-2-(4-methoxyphenyl)-4-oxobutanenitrile (25d):**  $R_f = 0.25$  (Petroleum ether/EtOAc, 15:1). 37.7 mg, 71% yield. Yellow liquid.  $^1\text{H}$  NMR (400 MHz, Chloroform-*d*)  $\delta$  7.70 – 7.67 (m, 1H), 7.62 – 7.58 (m, 1H), 7.49 – 7.42 (m, 1H), 7.32 – 7.26 (m, 3H), 7.20 – 7.18 (m, 2H), 4.50 (dd,  $J = 8.0, 6.0$  Hz, 1H), 3.67 (dd,  $J = 18.0, 8.0$  Hz, 1H), 3.46 (dd,  $J = 18.0, 6.0$  Hz, 1H), 2.34 (s, 3H).  $^{13}\text{C}$  NMR (101 MHz, Chloroform-*d*)  $\delta$  193.6 (d,  $J = 2.3$  Hz), 162.9 (d,  $J = 248.8$  Hz), 138.4, 137.8 (d,  $J = 6.2$  Hz), 132.0, 130.6 (d,  $J = 7.7$  Hz), 130.0, 127.3, 123.8 (d,  $J = 3.1$  Hz), 120.9 (d,  $J = 21.5$  Hz), 120.6, 114.9 (d,  $J = 22.5$  Hz), 44.7, 31.5, 21.0.  $^{19}\text{F}$  NMR (376 MHz, Chloroform-*d*)  $\delta$  -111.10. HRMS (ESI)  $m/z$ :  $[\text{M} + \text{Na}]^+$  Calcd for  $\text{C}_{17}\text{H}_{14}\text{FNONa}$  290.0952; Found 290.0951.

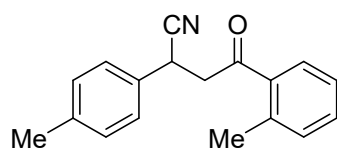

**2-(4-Methoxyphenyl)-4-oxo-4-(o-tolyl)butanenitrile (26d):**  $R_f = 0.25$  (Petroleum ether/EtOAc, 20:1). 33.8 mg, 64% yield. Yellow liquid.  $^1\text{H}$  NMR (400 MHz, Chloroform-*d*)  $\delta$  7.58 – 7.55 (m, 1H), 7.42 – 7.36 (m, 1H), 7.30 – 7.26 (m, 3H), 7.24 – 7.22 (m, 1H), 7.19 – 7.17 (d,  $J = 7.9$  Hz, 2H), 4.50 (dd,  $J = 7.9, 6.3$  Hz, 1H), 3.61 (dd,  $J = 17.6, 7.9$  Hz, 1H), 3.42 (dd,  $J = 17.6, 6.3$  Hz, 1H), 2.49 (s, 3H), 2.34 (s, 3H).  $^{13}\text{C}$  NMR (101 MHz, Chloroform-*d*)  $\delta$  198.1, 139.1, 138.2, 136.2, 132.3, 132.2, 132.2, 129.9, 128.6, 127.4, 125.9, 120.8, 46.9, 31.8, 21.4, 21.1. HRMS (ESI)  $m/z$ :  $[\text{M} + \text{Na}]^+$  Calcd for  $\text{C}_{18}\text{H}_{17}\text{NONa}$  286.1202; Found 286.1199.

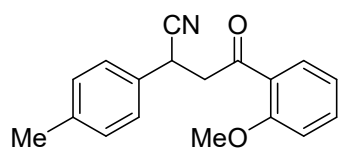

**4-(2-Methoxyphenyl)-2-(4-methoxyphenyl)-4-oxobutanenitrile (27d):**  $R_f = 0.25$  (Petroleum ether/EtOAc, 10:1). 21.6 mg, 39% yield. Yellow solid.  $^1\text{H NMR}$  (600 MHz, Chloroform-*d*)  $\delta$  7.80 - 7.78 (m, 1H), 7.51 - 7.48 (m, 1H), 7.29 (d,  $J = 7.9$  Hz, 2H), 7.18 (d,  $J = 7.9$  Hz, 2H), 7.01 (t,  $J = 7.7$  Hz, 1H), 6.96 (d,  $J = 8.4$  Hz, 1H), 4.52 (dd,  $J = 7.8, 6.3$  Hz, 1H), 3.89 (s, 3H), 3.73 (dd,  $J = 18.3, 7.8$  Hz, 1H), 3.52 (dd,  $J = 18.3, 6.3$  Hz, 1H), 2.34 (s, 3H).  $^{13}\text{C NMR}$  (101 MHz, Chloroform-*d*)  $\delta$  196.3, 159.1, 137.9, 134.5, 132.7, 130.9, 129.8, 127.4, 126.5, 120.9, 111.6, 55.6, 49.4, 31.8, 21.0. HRMS (ESI)  $m/z$ :  $[\text{M} + \text{H}]^+$  Calcd for  $\text{C}_{18}\text{H}_{18}\text{NO}_2$  280.1332; Found 280.1332.

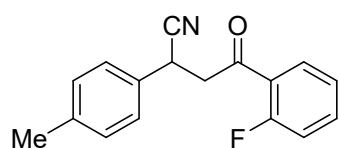

**4-(2-Fluorophenyl)-2-(4-methoxyphenyl)-4-oxobutanenitrile (28d):**  $R_f = 0.25$  (Petroleum ether/EtOAc, 18:1). 36.3 mg, 68% yield. Light yellow solid.  $^1\text{H NMR}$  (400 MHz, Chloroform-*d*)  $\delta$  7.95 - 7.90 (m, 1H), 7.58 - 7.53 (m, 1H), 7.32 - 7.30 (m, 2H), 7.27 - 7.23 (m, 1H), 7.19 (d,  $J = 7.9$  Hz, 2H), 7.16 - 7.11 (m, 1H), 4.50 (dd,  $J = 8.3, 5.8$  Hz, 1H), 3.74 - 3.67 (m, 1H), 3.53 - 3.46 (m, 1H), 2.34 (s, 3H).  $^{13}\text{C NMR}$  (101 MHz, Chloroform-*d*)  $\delta$  192.9 (d,  $J = 4.1$  Hz), 162.3 (d,  $J = 254.9$  Hz), 138.2, 135.5 (d,  $J = 9.2$  Hz), 132.2, 130.9 (d,  $J = 2.3$  Hz), 129.9, 127.4, 124.8 (d,  $J = 3.3$  Hz), 124.2 (d,  $J = 12.5$  Hz), 120.7, 116.8 (d,  $J = 23.8$  Hz), 49.1 (d,  $J = 9.0$  Hz), 31.5 (d,  $J = 2.8$  Hz), 21.1.  $^{19}\text{F NMR}$  (376 MHz, Chloroform-*d*)  $\delta$  -108.53. HRMS (ESI)  $m/z$ :  $[\text{M} + \text{Na}]^+$  Calcd for  $\text{C}_{17}\text{H}_{14}\text{FNONa}$  290.0952; Found 290.0948.

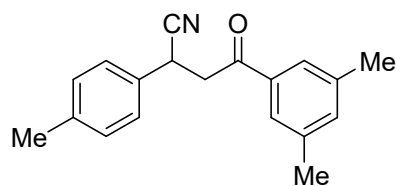

**4-(3,5-Dimethylphenyl)-2-(4-methoxyphenyl)-4-oxobutanenitrile (29d):**  $R_f = 0.25$

(Petroleum ether/EtOAc, 23:1). 38.2 mg, 69% yield. Yellow liquid.  $^1\text{H}$  NMR (400 MHz, Chloroform-*d*)  $\delta$  7.52 – 7.52 (m, 2H), 7.32 – 7.30 (m, 2H), 7.21 – 7.17 (m, 3H), 4.51 (dd,  $J = 7.9, 6.1$  Hz, 1H), 3.67 (dd,  $J = 17.9, 7.9$  Hz, 1H), 3.45 (dd,  $J = 17.9, 6.1$  Hz, 1H), 2.35 (s, 6H), 2.34 (s, 3H).  $^{13}\text{C}$  NMR (101 MHz, Chloroform-*d*)  $\delta$  195.0, 138.5, 138.2, 135.9, 135.5, 132.4, 129.9, 127.4, 125.9, 120.9, 44.7, 31.6, 21.2, 21.1. HRMS (ESI)  $m/z$ :  $[\text{M} + \text{Na}]^+$  Calcd for  $\text{C}_{19}\text{H}_{19}\text{NONa}$  300.1359; Found 300.1363.

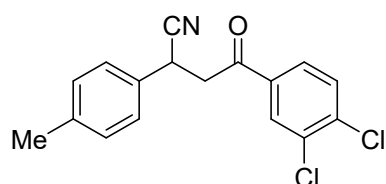

**4-(3,4-Dichlorophenyl)-2-(4-methoxyphenyl)-4-oxobutanenitrile (30d):**  $R_f = 0.25$  (Petroleum ether/EtOAc, 19:1). 35.2 mg, 56% yield. Yellow solid.  $^1\text{H}$  NMR (400 MHz, Chloroform-*d*)  $\delta$  7.98 (d,  $J = 2.0$  Hz, 1H), 7.74 – 7.72 (m, 1H), 7.54 (d,  $J = 8.4$  Hz, 1H), 7.31 – 7.28 (m, 2H), 7.19 (d,  $J = 7.9$  Hz, 2H), 4.48 (dd,  $J = 8.0, 5.9$  Hz, 1H), 3.65 (dd,  $J = 18.0, 8.0$  Hz, 1H), 3.43 (dd,  $J = 18.0, 5.9$  Hz, 1H), 2.34 (s, 3H).  $^{13}\text{C}$  NMR (101 MHz, Chloroform-*d*)  $\delta$  192.7, 138.6, 138.5, 135.3, 133.7, 131.8, 131.0, 130.1, 130.0, 127.3, 127.0, 120.4, 44.6, 31.5, 21.1. HRMS (ESI)  $m/z$ :  $[\text{M} + \text{Na}]^+$  Calcd for  $\text{C}_{17}\text{H}_{13}\text{Cl}_2\text{NONa}$  340.0266; Found 340.0266.

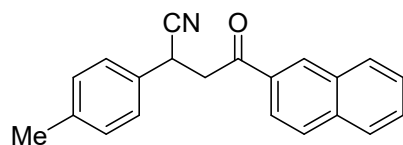

**2-(4-Methoxyphenyl)-4-(naphthalen-2-yl)-4-oxobutanenitrile (31d):**  $R_f = 0.25$  (Petroleum ether/EtOAc, 12:1). 36.4 mg, 61% yield. Yellow solid.  $^1\text{H}$  NMR (400 MHz, Chloroform-*d*)  $\delta$  8.40 (s, 1H), 8.00 – 7.97 (m, 1H), 7.93 – 7.85 (m, 3H), 7.63 – 7.53 (m, 2H), 7.36 – 7.34 (m, 2H), 7.20 (d,  $J = 7.9$  Hz, 2H), 4.58 (dd,  $J = 7.9, 6.1$  Hz, 1H), 3.83 (dd,  $J = 17.8, 7.9$  Hz, 1H), 3.62 (dd,  $J = 17.8, 6.1$  Hz, 1H), 2.34 (s, 3H).  $^{13}\text{C}$  NMR (101 MHz, Chloroform-*d*)  $\delta$  194.7, 138.3, 135.9, 133.1, 132.4, 132.4, 130.0, 129.9, 129.6, 128.9, 128.8, 127.9, 127.4, 127.1, 123.5, 120.8, 44.6, 31.7, 21.1. HRMS (ESI)  $m/z$ :  $[\text{M} + \text{H}]^+$  Calcd for  $\text{C}_{21}\text{H}_{18}\text{NO}$  300.1383; Found 300.1385.



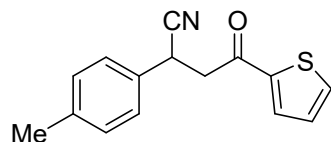

**2-(4-Methoxyphenyl)-4-oxo-4-(thiophen-2-yl)butanenitrile (32d):**  $R_f = 0.25$  (Petroleum ether/EtOAc, 10:1). 22.4 mg, 44% yield. White solid.  $^1\text{H}$  NMR (400 MHz, Chloroform-*d*)  $\delta$  7.68 – 7.67 (m, 2H), 7.30 (d,  $J = 7.8$  Hz, 2H), 7.18 (d,  $J = 7.8$  Hz, 2H), 7.12 (t,  $J = 4.4$  Hz, 1H), 4.51 (t,  $J = 7.0$  Hz, 1H), 3.62 (dd,  $J = 17.2, 7.7$  Hz, 1H), 3.41 (dd,  $J = 17.3, 6.4$  Hz, 1H), 2.34 (s, 3H).  $^{13}\text{C}$  NMR (101 MHz, Chloroform-*d*)  $\delta$  187.5, 142.8, 138.3, 134.7, 132.5, 132.0, 129.9, 128.3, 127.3, 120.5, 44.9, 31.6, 21.1. HRMS (ESI)  $m/z$ :  $[\text{M} + \text{Na}]^+$  Calcd for  $\text{C}_{15}\text{H}_{13}\text{NOSNa}$  278.0610; Found 278.0612.

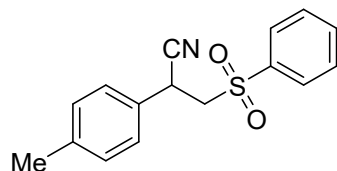

**3-(Phenylsulfonyl)-2-(p-tolyl)propanenitrile (33d):**  $R_f = 0.25$  (Petroleum ether/EtOAc, 6:1). 35.3 mg, 62% yield. Colorless liquid.  $^1\text{H}$  NMR (600 MHz, Chloroform-*d*)  $\delta$  7.93 – 7.91 (m, 2H), 7.71 – 7.68 (m, 1H), 7.59 – 7.57 (m, 2H), 7.19 – 7.15 (m, 4H), 4.36 (dd,  $J = 9.4, 4.6$  Hz, 1H), 3.74 (dd,  $J = 14.6, 9.3$  Hz, 1H), 3.45 (dd,  $J = 14.6, 4.7$  Hz, 1H), 2.33 (s, 3H).  $^{13}\text{C}$  NMR (151 MHz, Chloroform-*d*)  $\delta$  139.2, 138.3, 134.5, 130.2, 129.9, 129.6, 128.3, 127.2, 118.1, 60.1, 31.7, 21.1. HRMS (ESI)  $m/z$ :  $[\text{M} + \text{Na}]^+$  Calcd for  $\text{C}_{16}\text{H}_{15}\text{NO}_2\text{SNa}$  308.0716; Found 308.0714.

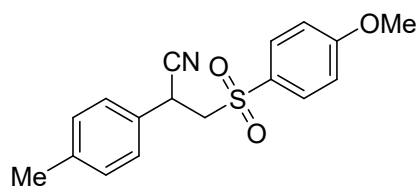

**3-((4-Methoxyphenyl)sulfonyl)-2-(p-tolyl)propanenitrile (34d)<sup>10</sup>:**  $R_f = 0.25$  (Petroleum ether/EtOAc, 5:1). 46.0 mg, 73% yield. White solid.  $^1\text{H}$  NMR (400 MHz, Chloroform-*d*)  $\delta$  7.84 (d,  $J = 8.9$  Hz, 2H), 7.19 - 7.14 (m, 4H), 7.03 - 7.01 (m, 2H), 4.33 (dd,  $J = 9.4, 4.5$  Hz, 1H), 3.89 (s, 3H), 3.71 (dd,  $J = 14.5, 9.4$  Hz, 1H), 3.41 (dd,  $J = 14.5, 4.6$  Hz, 1H), 2.33 (s, 3H).

$^{13}\text{C}$  NMR (101 MHz, Chloroform-*d*)  $\delta$  164.4, 139.1, 130.6, 130.2, 130.1, 129.7, 127.2, 118.2, 114.8, 60.3, 55.8, 31.9, 21.1.

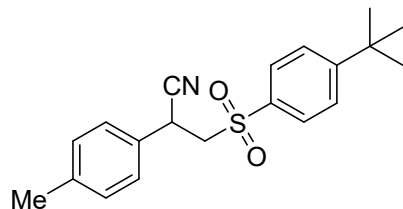

**3-((4-(Tert-butyl)phenyl)sulfonyl)-2-(p-tolyl)propanenitrile (35d):**  $R_f = 0.25$  (Petroleum ether/EtOAc, 12:1). 51.8 mg, 76% yield. White solid.  $^1\text{H}$  NMR (600 MHz, Chloroform-*d*)  $\delta$  7.80 (d,  $J = 8.3$  Hz, 2H), 7.55 (d,  $J = 8.4$  Hz, 2H), 7.17 (d,  $J = 7.9$  Hz, 2H), 7.13 (d,  $J = 8.0$  Hz, 2H), 4.36 (dd,  $J = 8.9, 5.1$  Hz, 1H), 3.72 (dd,  $J = 14.5, 8.9$  Hz, 1H), 3.45 (dd,  $J = 14.5, 5.1$  Hz, 1H), 2.32 (s, 3H), 1.34 (s, 9H).  $^{13}\text{C}$  NMR (151 MHz, Chloroform-*d*)  $\delta$  158.6, 139.0, 135.3, 130.1, 130.0, 128.1, 127.3, 126.5, 118.2, 60.0, 35.4, 31.7, 31.0, 21.1. HRMS (ESI)  $m/z$ :  $[\text{M} + \text{Na}]^+$  Calcd for  $\text{C}_{20}\text{H}_{23}\text{NO}_2\text{SNa}$  364.1342; Found 364.1341.

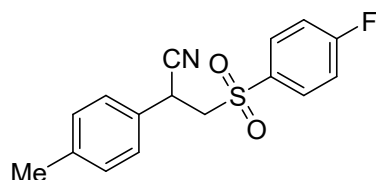

**3-((4-Fluorophenyl)sulfonyl)-2-(p-tolyl)propanenitrile (36d):**  $R_f = 0.25$  (Petroleum ether/EtOAc, 8:1). 43.6 mg, 72% yield. White solid.  $^1\text{H}$  NMR (400 MHz, Chloroform-*d*)  $\delta$  7.95 – 7.90 (m, 2H), 7.26 – 7.21 (m, 2H), 7.19 – 7.15 (m, 4H), 4.36 (dd,  $J = 9.3, 4.8$  Hz, 1H), 3.73 (dd,  $J = 14.5, 9.3$  Hz, 1H), 3.46 (dd,  $J = 14.6, 4.8$  Hz, 1H), 2.33 (s, 3H).  $^{13}\text{C}$  NMR (101 MHz, Chloroform-*d*)  $\delta$  166.3 (d,  $J = 258.0$  Hz), 139.3, 134.4 (d,  $J = 3.2$  Hz), 131.3 (d,  $J = 9.8$  Hz), 130.3, 129.7, 127.2, 118.0, 116.9 (d,  $J = 22.8$  Hz), 60.2, 31.8, 21.1.  $^{19}\text{F}$  NMR (376 MHz, Chloroform-*d*)  $\delta$  -101.74. HRMS (ESI)  $m/z$ :  $[\text{M} + \text{Na}]^+$  Calcd for  $\text{C}_{16}\text{H}_{14}\text{FNO}_2\text{SNa}$  326.0621; Found 326.0621.

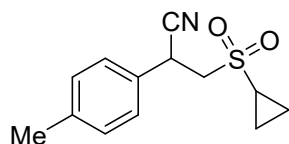

**3-(Cyclopropylsulfonyl)-2-(p-tolyl)propanenitrile (37d):**  $R_f = 0.25$  (Petroleum ether/EtOAc, 5:1). 35.7 mg, 72% yield. White solid.  $^1\text{H}$  NMR (600 MHz, Chloroform-*d*)  $\delta$  7.30 (d,  $J = 7.9$  Hz, 2H), 7.23 (d,  $J = 7.8$  Hz, 2H), 4.44 (dd,  $J = 9.3, 5.0$  Hz, 1H), 3.69 (dd,  $J = 14.6, 9.3$  Hz, 1H), 3.36 (dd,  $J = 14.6, 5.0$  Hz, 1H), 2.41 – 2.38 (m, 1H), 2.37 (s, 3H), 1.39 – 1.35 (m, 1H), 1.27 – 1.23 (m, 1H), 1.12 – 1.06 (m, 2H).  $^{13}\text{C}$  NMR (151 MHz, Chloroform-*d*)  $\delta$  139.3, 130.3, 130.0, 127.3, 118.9, 58.3, 32.0, 30.6, 21.1, 5.9, 5.5. HRMS (ESI)  $m/z$ :  $[\text{M} + \text{Na}]^+$  Calcd for  $\text{C}_{13}\text{H}_{15}\text{NO}_2\text{SNa}$  272.0716; Found 272.0713.

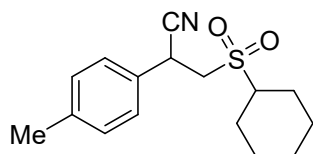

**3-(Cyclohexylsulfonyl)-2-(p-tolyl)propanenitrile (38d):**  $R_f = 0.25$  (Petroleum ether/EtOAc, 8:1). 42.0 mg, 72% yield. White solid.  $^1\text{H}$  NMR (600 MHz, Chloroform-*d*)  $\delta$  7.30 (d,  $J = 7.8$  Hz, 2H), 7.23 (d,  $J = 7.9$  Hz, 2H), 4.43 (dd,  $J = 8.8, 5.3$  Hz, 1H), 3.61 (dd,  $J = 14.5, 8.7$  Hz, 1H), 3.23 (dd,  $J = 14.5, 5.3$  Hz, 1H), 2.79 – 2.74 (m, 1H), 2.37 (s, 3H), 2.14 – 2.09 (m, 2H), 1.93 – 1.89 (m, 2H), 1.72 – 1.70 (m, 1H), 1.57 – 1.49 (m, 2H), 1.28 – 1.18 (m, 3H).  $^{13}\text{C}$  NMR (151 MHz, Chloroform-*d*)  $\delta$  139.3, 130.3, 130.1, 127.4, 118.8, 62.0, 53.7, 31.3, 25.2, 24.9, 24.9, 24.4, 21.1. HRMS (ESI)  $m/z$ :  $[\text{M} + \text{Na}]^+$  Calcd for  $\text{C}_{16}\text{H}_{21}\text{NO}_2\text{SNa}$  314.1185; Found 314.1185.

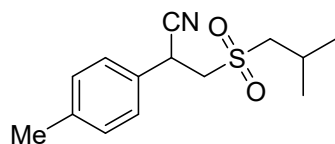

**3-(Isobutylsulfonyl)-2-(p-tolyl)propanenitrile (39d):**  $R_f = 0.25$  (Petroleum ether/EtOAc, 8:1). 38.1 mg, 72% yield. White solid.  $^1\text{H}$  NMR (600 MHz, Chloroform-*d*)  $\delta$  7.29 (d,  $J = 8.1$  Hz, 2H), 7.24 (d,  $J = 7.9$  Hz, 2H), 4.43 (dd,  $J = 8.8, 5.5$  Hz, 1H), 3.60 (dd,  $J = 14.7, 8.7$  Hz, 1H), 3.30 (dd,  $J = 14.7, 5.6$  Hz, 1H), 2.87 (dd,  $J = 13.9, 6.8$  Hz, 1H), 2.78 (dd,  $J = 13.9, 6.3$  Hz, 1H), 2.37 (s, 3H), 2.35 – 2.32 (m, 1H), 1.09 – 1.08 (m, 6H).  $^{13}\text{C}$  NMR (151 MHz,

Chloroform-*d*)  $\delta$  139.4, 130.4, 129.8, 127.4, 118.8, 61.8, 58.3, 31.9, 23.7, 22.7, 22.6, 21.1.

HRMS (ESI)  $m/z$ :  $[M + Na]^+$  Calcd for  $C_{14}H_{19}NO_2SNa$  288.1029; Found 288.1033.

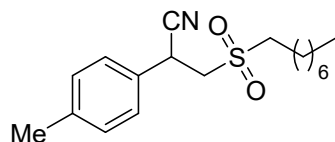

**3-(Octylsulfonyl)-2-(p-tolyl)propanenitrile (40d)**:  $R_f = 0.25$  (Petroleum ether/EtOAc, 10:1).

43.3 mg, 67% yield. Colorless liquid.  $^1H$  NMR (600 MHz, Chloroform-*d*)  $\delta$  7.29 (d,  $J = 7.9$  Hz, 2H), 7.24 (d,  $J = 7.9$  Hz, 2H), 4.42 (dd,  $J = 8.7, 5.6$  Hz, 1H), 3.60 (dd,  $J = 14.7, 8.6$  Hz, 1H), 3.30 (dd,  $J = 14.8, 5.6$  Hz, 1H), 2.94 – 2.86 (m, 2H), 2.37 (s, 3H), 1.84 – 1.73 (m, 2H), 1.39 – 1.34 (m, 2H), 1.31 – 1.23 (m, 8H), 0.88 (t,  $J = 7.0$  Hz, 3H).  $^{13}C$  NMR (151 MHz, Chloroform-*d*)  $\delta$  139.5, 130.4, 129.7, 127.4, 118.7, 56.9, 54.3, 31.9, 31.7, 28.9, 28.9, 28.3, 22.6, 21.9, 21.1, 14.0. HRMS (ESI)  $m/z$ :  $[M + Na]^+$  Calcd for  $C_{18}H_{27}NO_2SNa$  344.1655; Found 344.1657.

## 7. References

- [1] Yang, D.-Y.; Liu, L.; Gu, J.-Y.; He, Y.-H.; Guan, Z. *J. Org. Chem.* **2021**, *86*, 18042-18055.
- [2] Cao, Y.; Liu, L.; Huang, T.; Chen, T. *New J. Chem.* **2020**, *44*, 8697-8701.
- [3] Koike, T.; Akita, M. *Inorg. Chem. Front.* **2014**, *1*, 562-576.
- [4] Li, Z.-F.; Li, Q.; Ren, L.-Q.; Li, Q.-H.; Peng, Y.-G.; Liu, T.-L. *Chem. Sci.* **2019**, *10*, 5787-5792.
- [5] Zhang, L.; Wang, A.; Wang, W.; Huang, Y.; Liu, X.; Miao, S.; Liu, J.; Zhang, T. *ACS Catal.* **2015**, *5*, 6563-6572.
- [6] Jiao, Y.; Chiou, M.-F.; Li, Y.; Bao, H. *ACS Catal.* **2019**, *9*, 5191-5197.
- [7] Kong, X.; Chen, X.; Chen, Y.; Cao, Z.-Y. *J. Org. Chem.* **2022**, *87*, 7013-7021.
- [8] Dong, H.-R.; Dong, W.-J.; Li, R.-S.; Hu, Y.-M.; Dong, H.-S.; Xie, Z.-X. *Green Chem.* **2014**, *16*, 3454-3457.

[9] Li, Z.; Yin, J. *Chin. J. Chem.* **2017**, *35*, 1179-1184.

[10] Liu, L.; Si, M.; Han, S.; Zhang, Y.; Li, J. *Org. Chem. Front.* **2020**, *7*, 2029-2034.

## 8. NMR of products

$^1\text{H-NMR}$  Spectrum (600 MHz,  $\text{CDCl}_3$ ) of **1d**

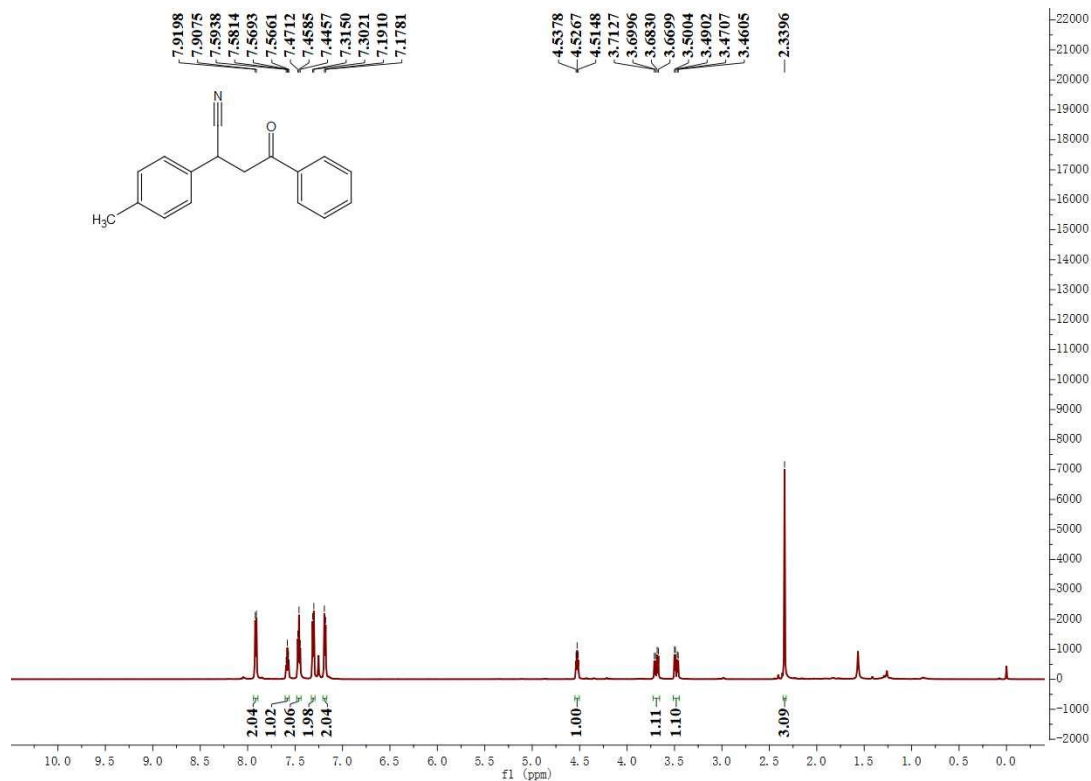

$^{13}\text{C-NMR}$  Spectrum (151 MHz,  $\text{CDCl}_3$ ) of **1d**

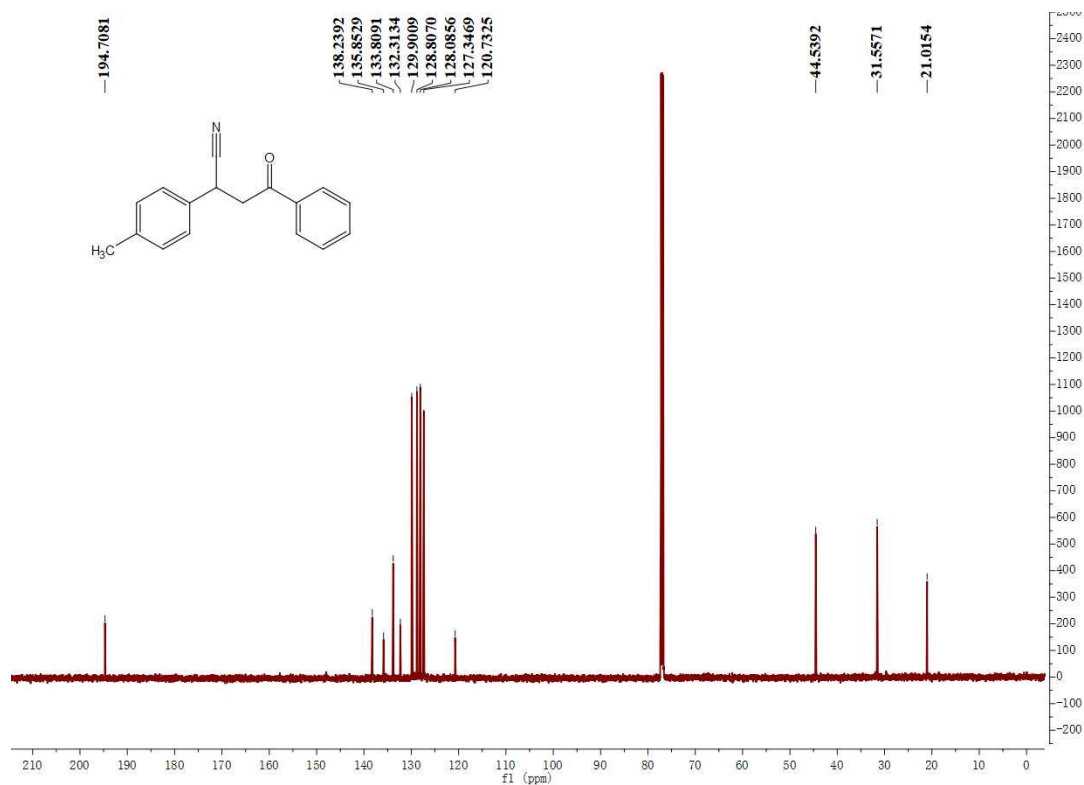

<sup>1</sup>H-NMR Spectrum (600 MHz, CDCl<sub>3</sub>) of **1e**

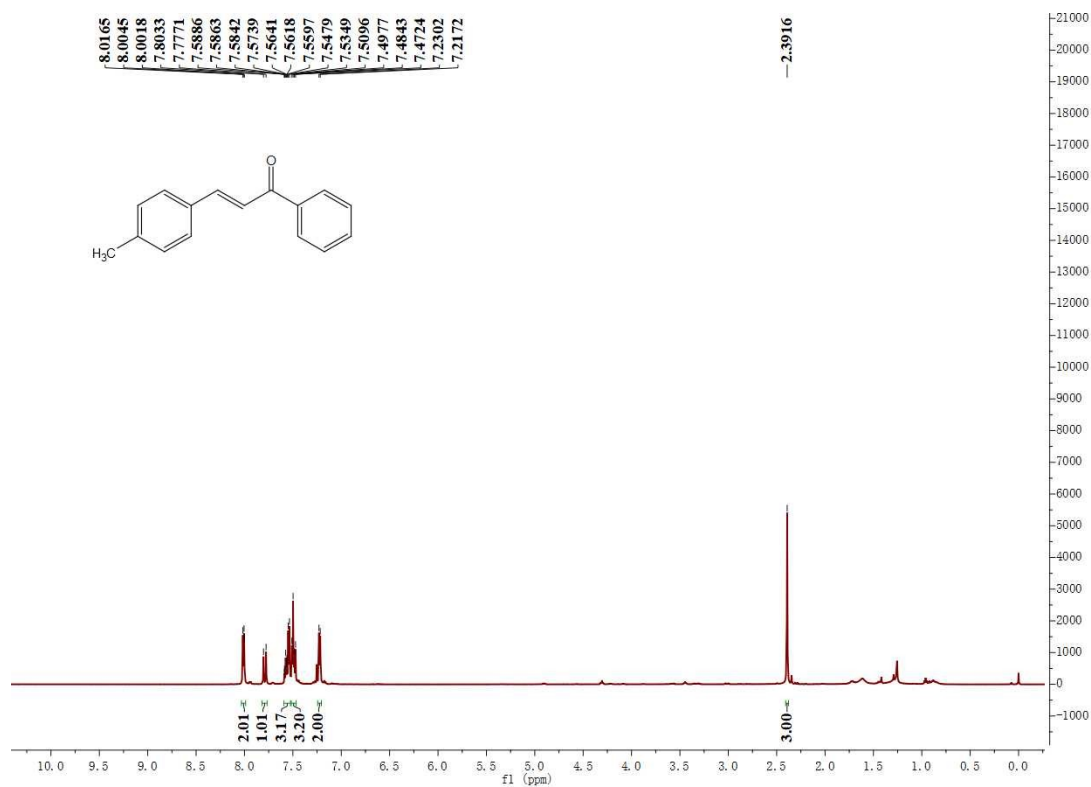

<sup>13</sup>C-NMR Spectrum (151 MHz, CDCl<sub>3</sub>) of **1e**

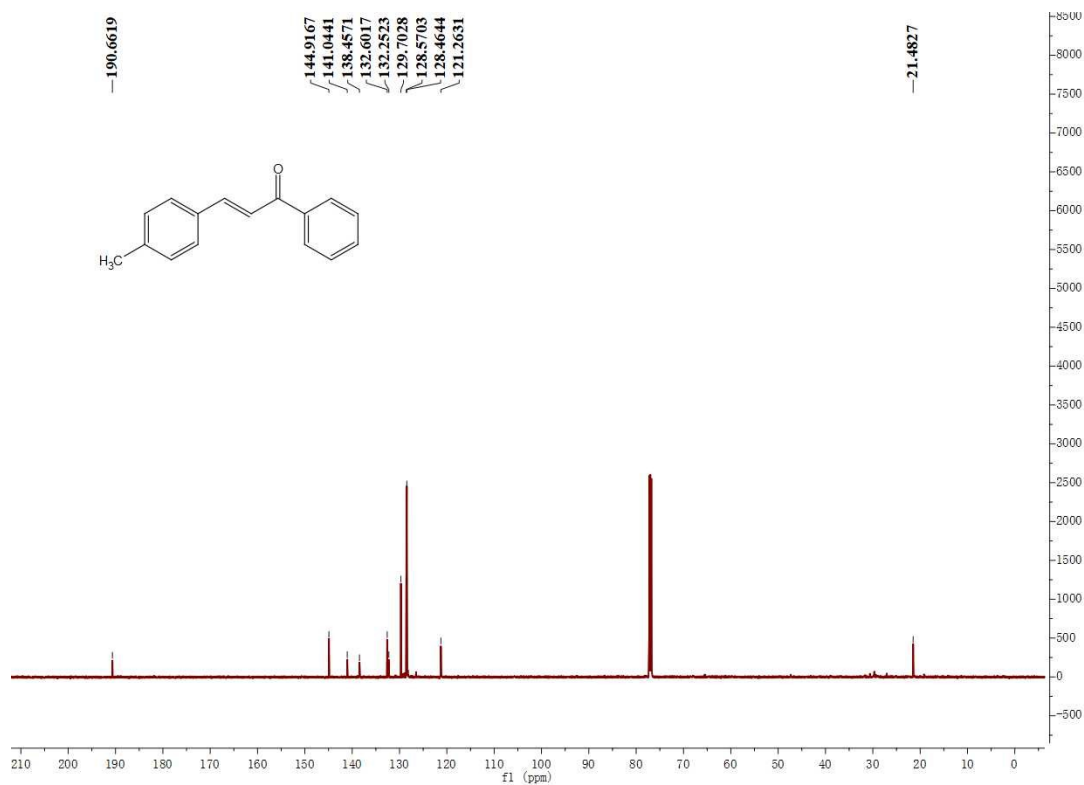

<sup>1</sup>H-NMR Spectrum (600 MHz, CDCl<sub>3</sub>) of **1f**

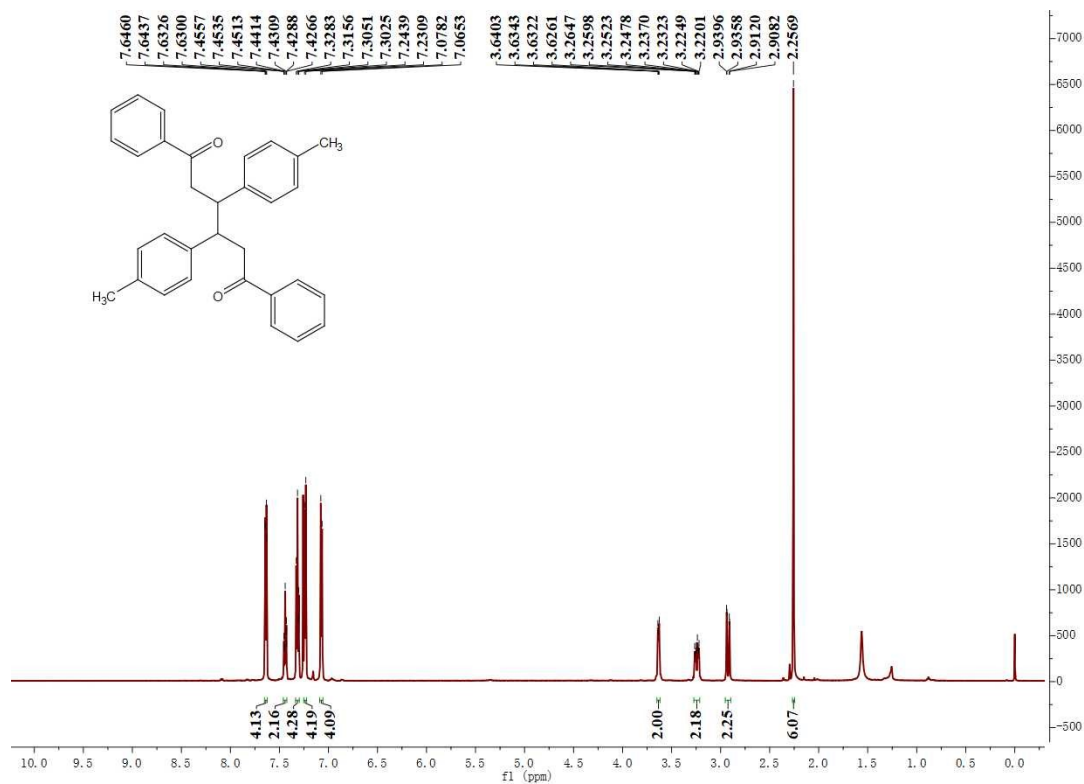

<sup>13</sup>C-NMR Spectrum (151 MHz, CDCl<sub>3</sub>) of **1f**

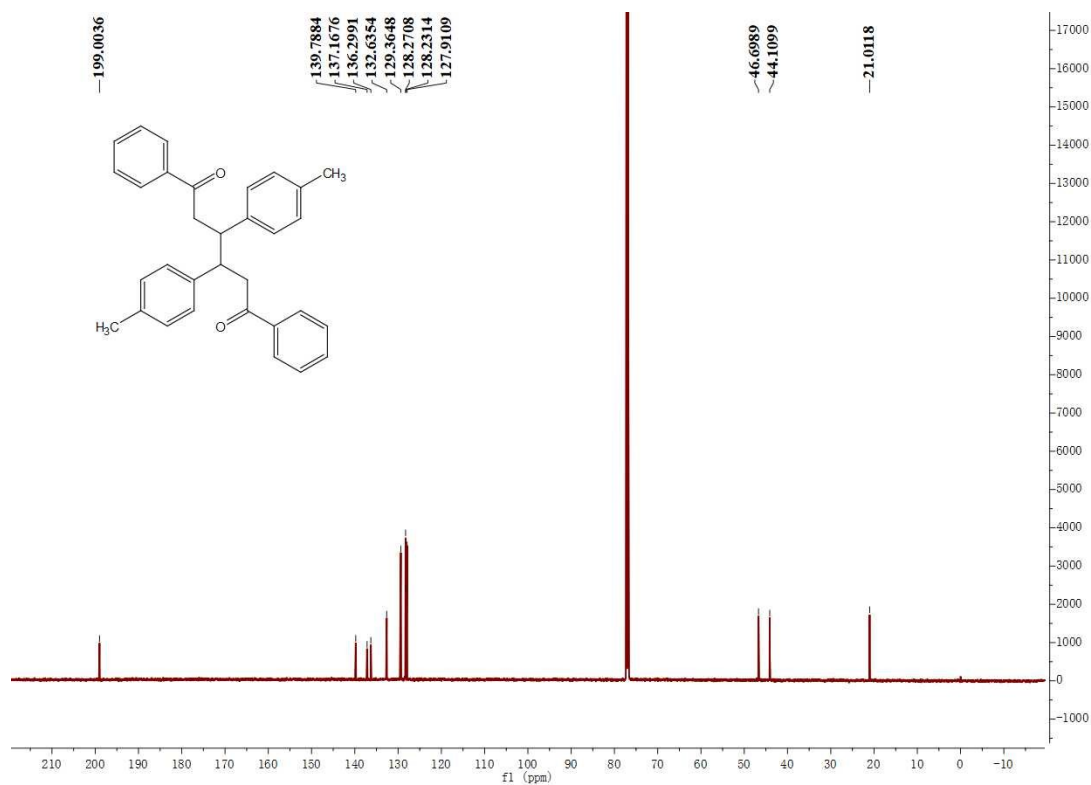



<sup>1</sup>H-NMR Spectrum (400 MHz, CDCl<sub>3</sub>) of **2d**

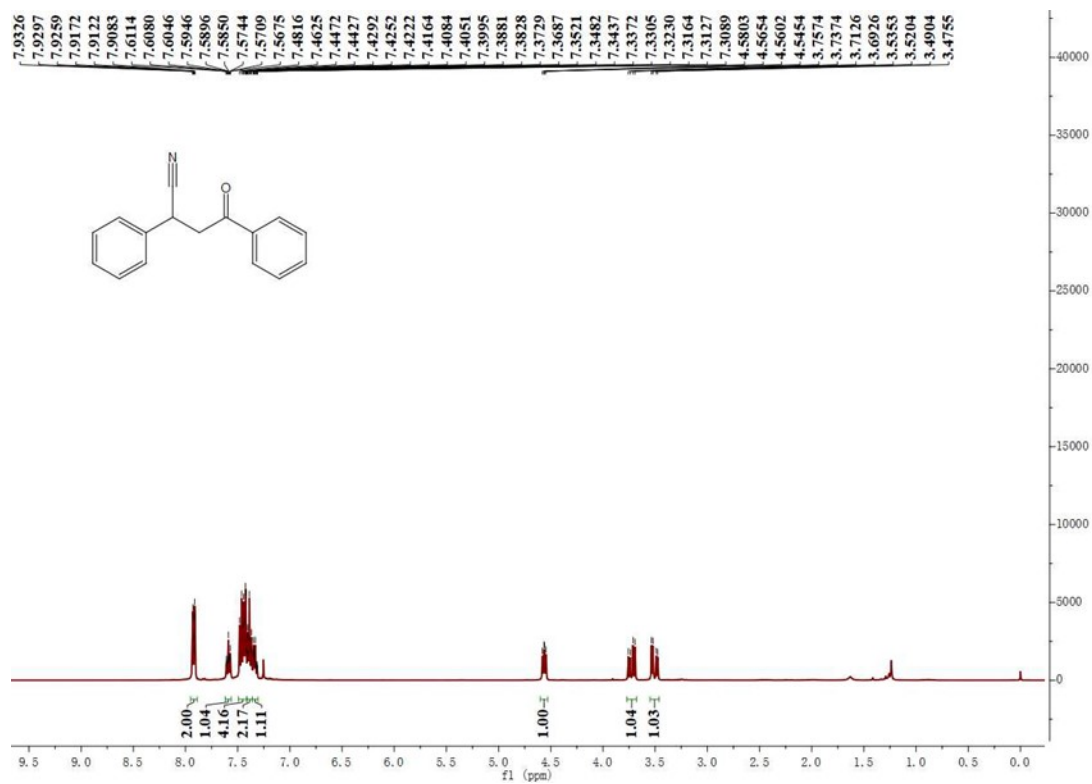

<sup>13</sup>C-NMR Spectrum (101 MHz, CDCl<sub>3</sub>) of **2d**

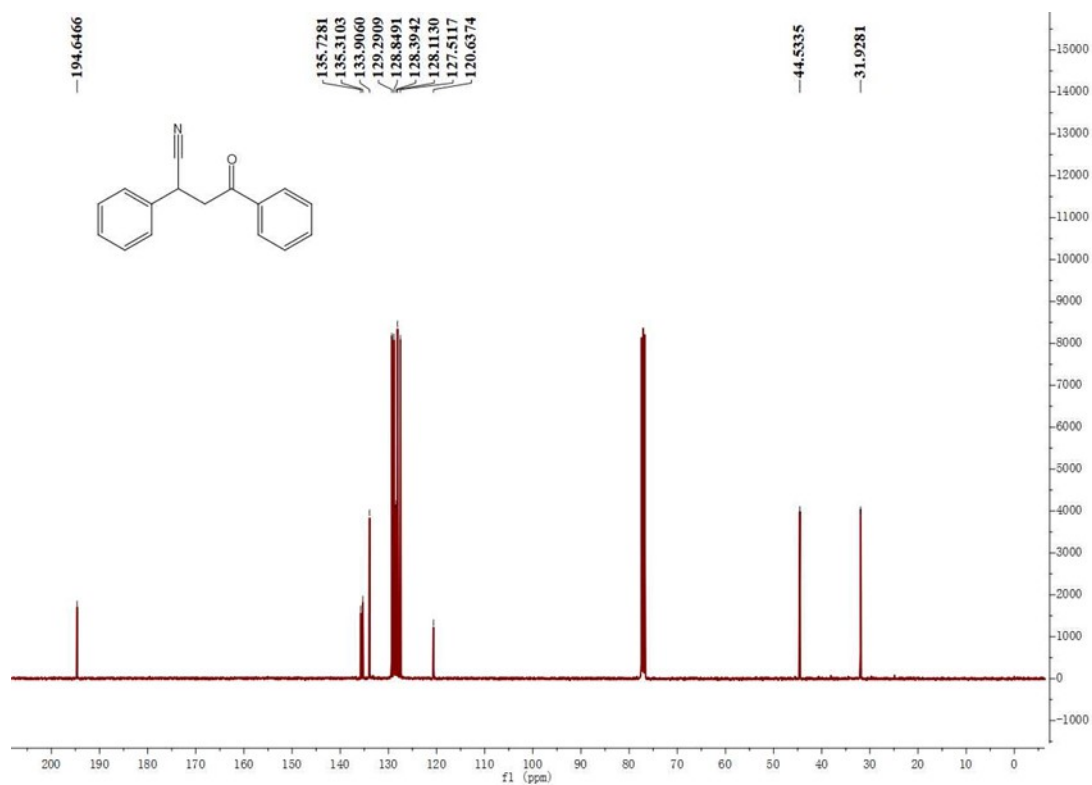

### $^1\text{H-NMR}$ Spectrum (400 MHz, $\text{CDCl}_3$ ) of **3d**

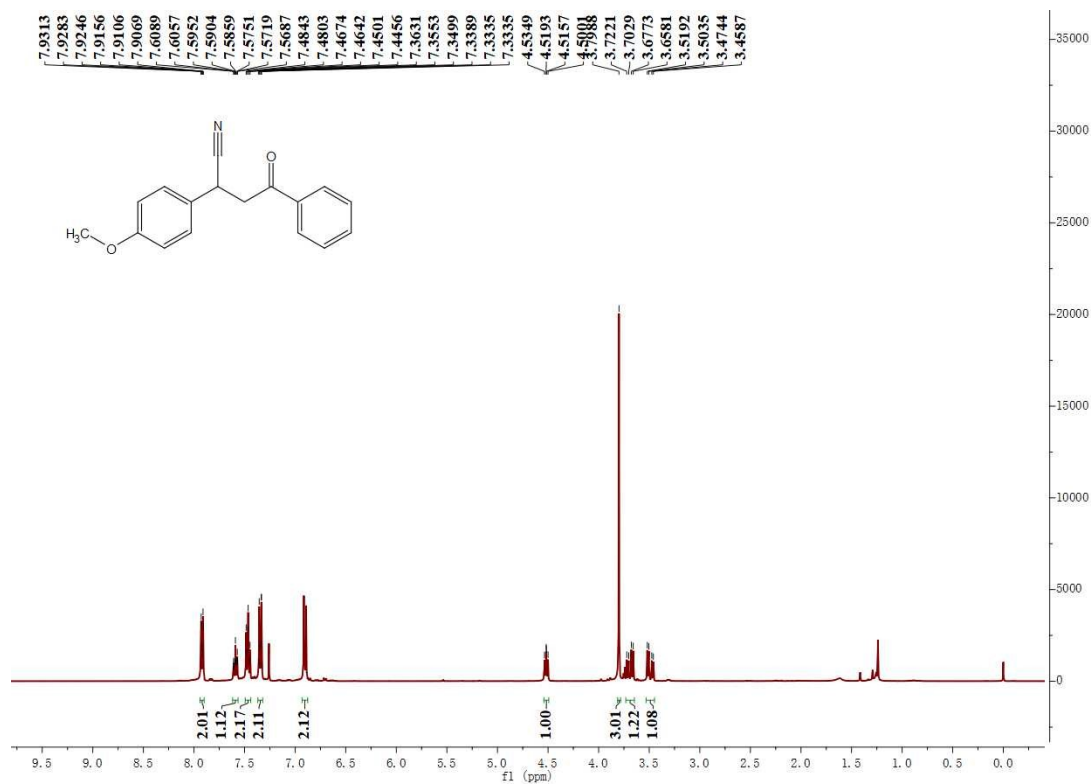

### $^{13}\text{C-NMR}$ Spectrum (101 MHz, $\text{CDCl}_3$ ) of **3d**

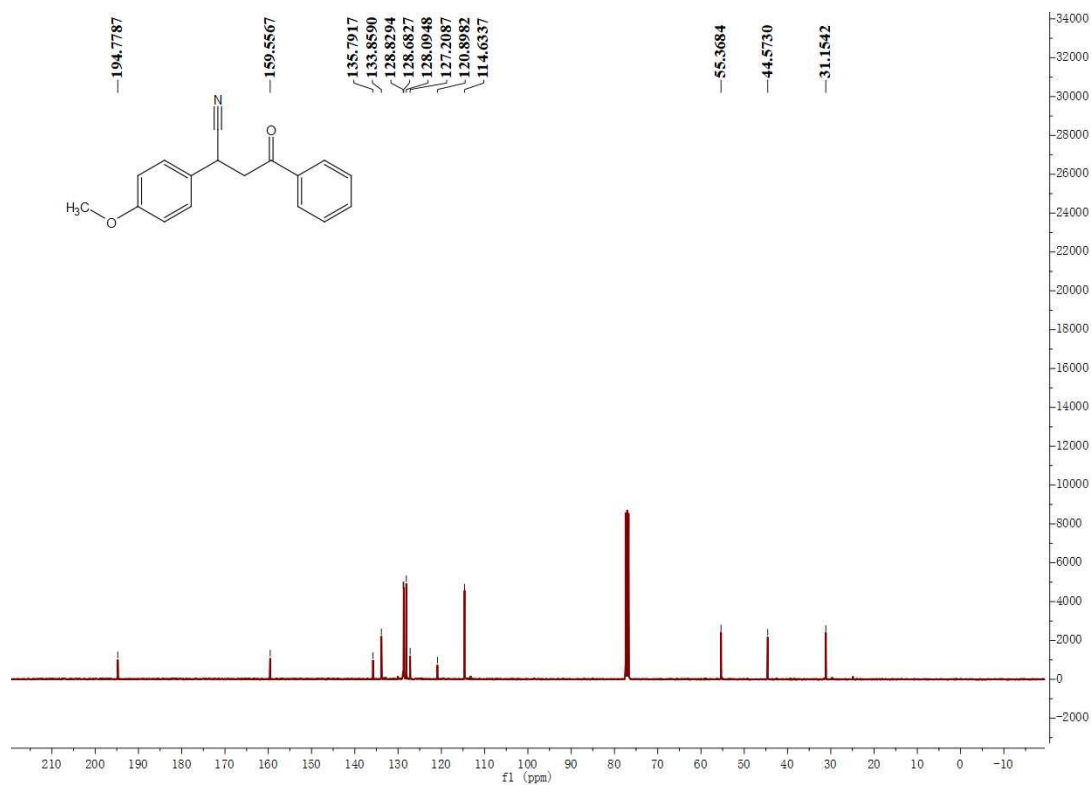

### <sup>1</sup>H-NMR Spectrum (400 MHz, CDCl<sub>3</sub>) of **4d**

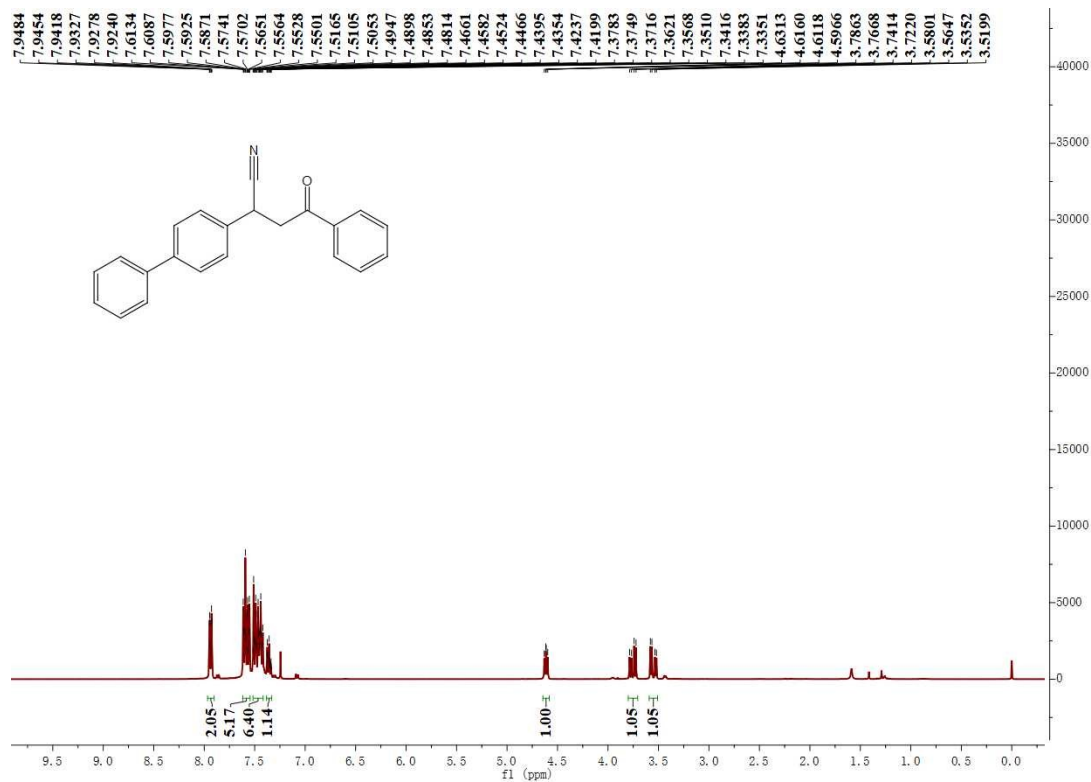

### <sup>13</sup>C-NMR Spectrum (101 MHz, CDCl<sub>3</sub>) of **4d**

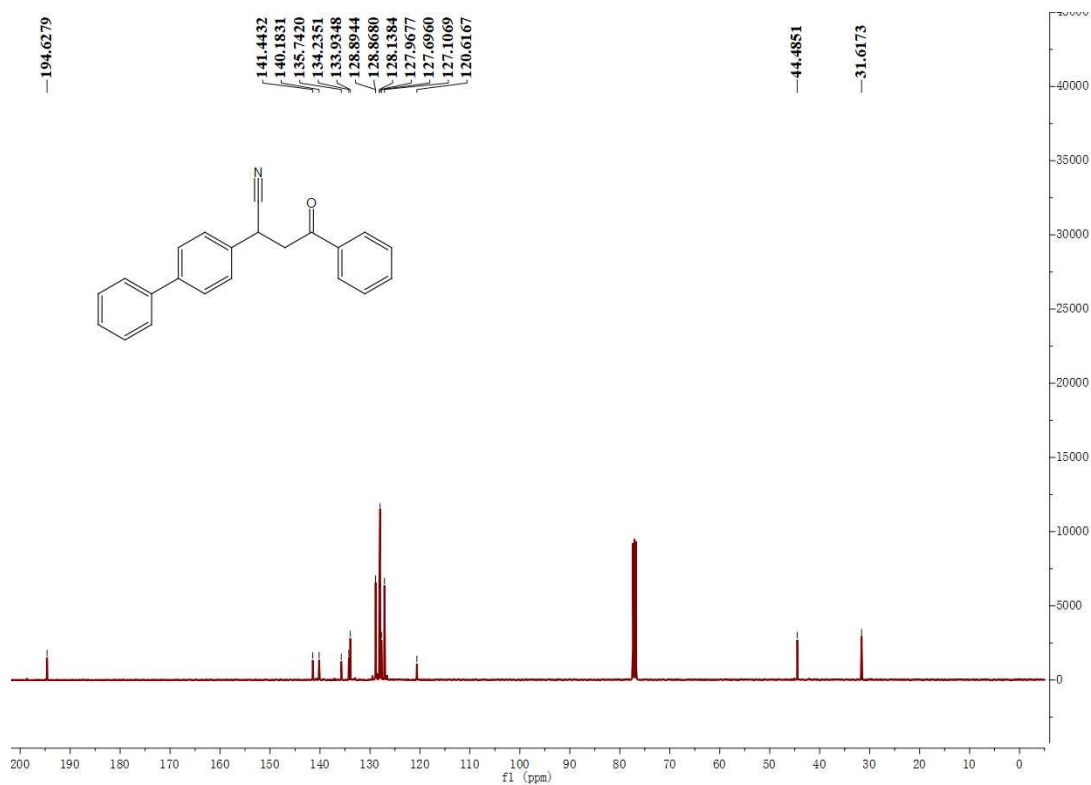

<sup>1</sup>H-NMR Spectrum (400 MHz, CDCl<sub>3</sub>) of **5d**

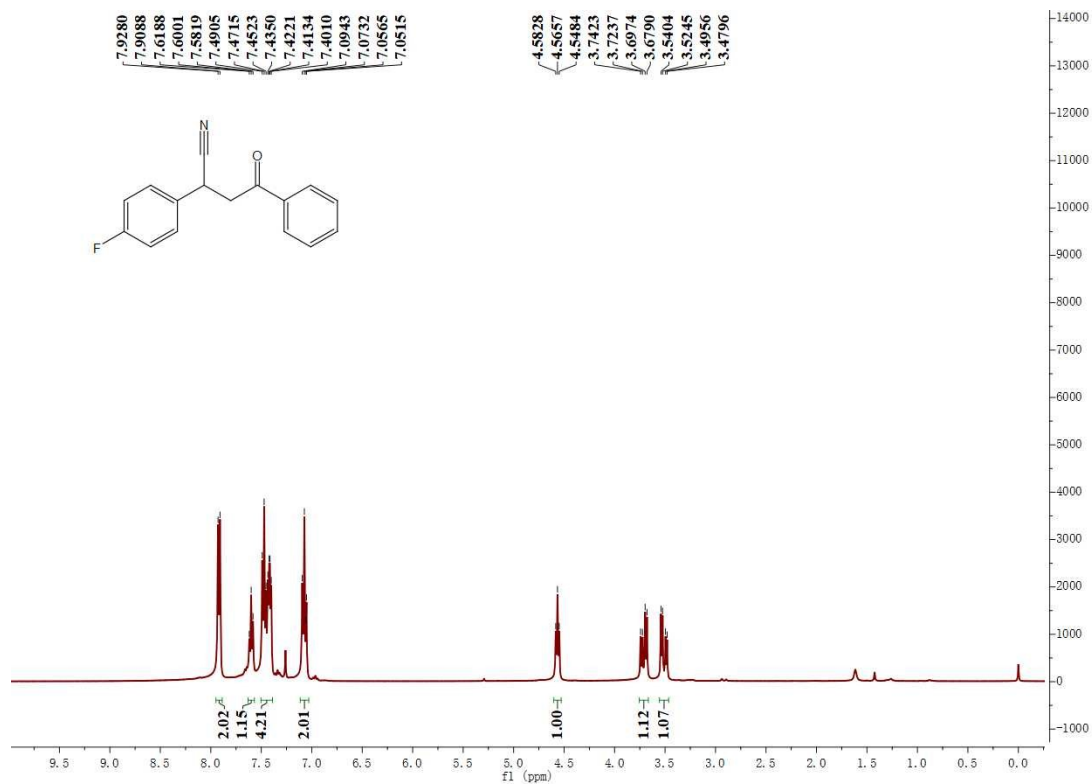

<sup>13</sup>C-NMR Spectrum (101 MHz, CDCl<sub>3</sub>) of **5d**

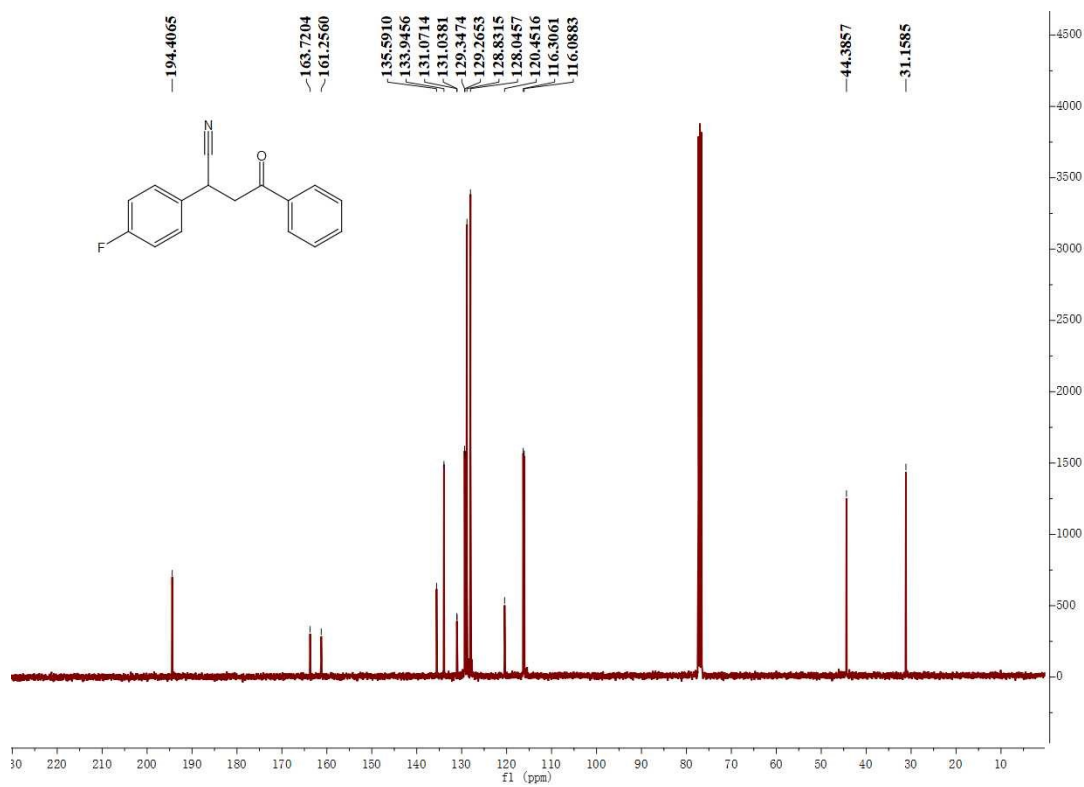

<sup>19</sup>F-NMR Spectrum (376 MHz, CDCl<sub>3</sub>) of **5d**

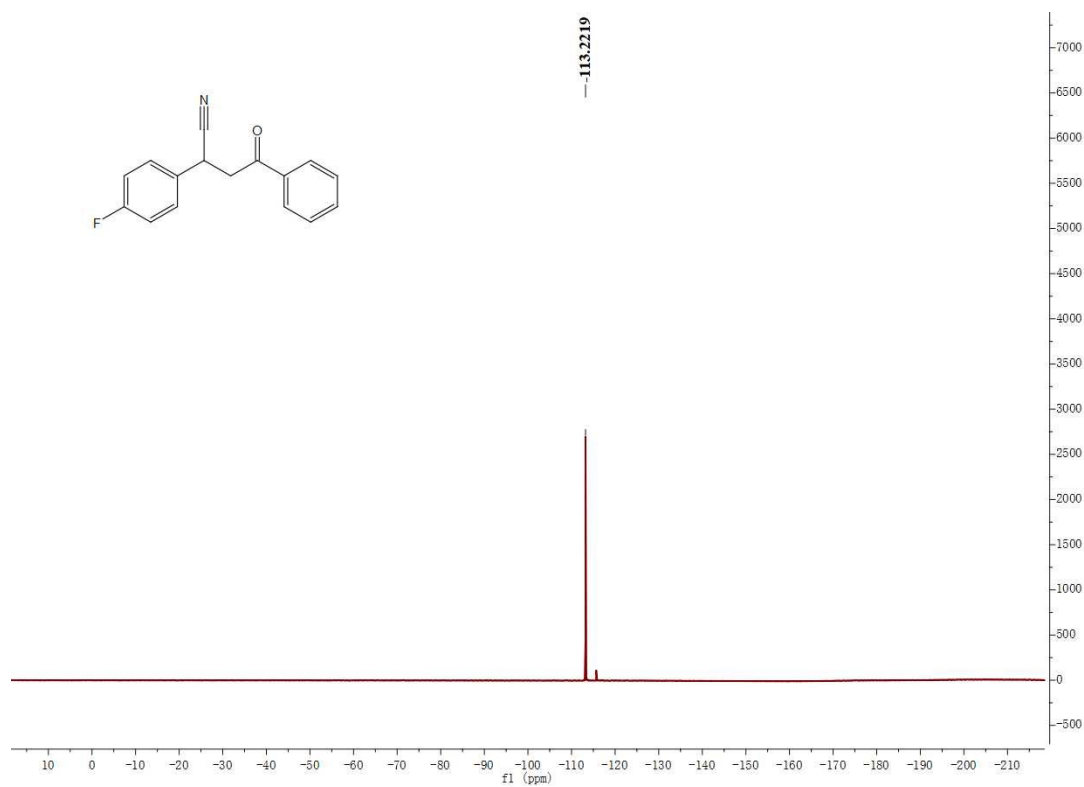

<sup>1</sup>H-NMR Spectrum (400 MHz, CDCl<sub>3</sub>) of **6d**

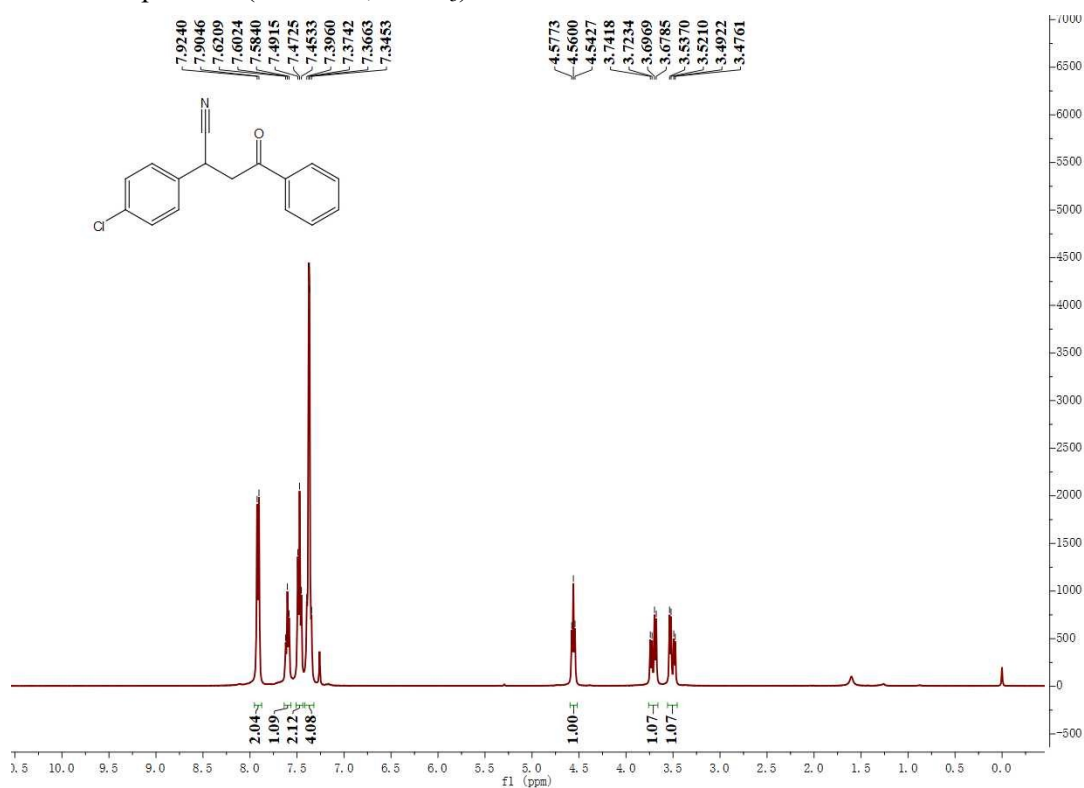

$^{13}\text{C}$ -NMR Spectrum (101 MHz,  $\text{CDCl}_3$ ) of **6d**

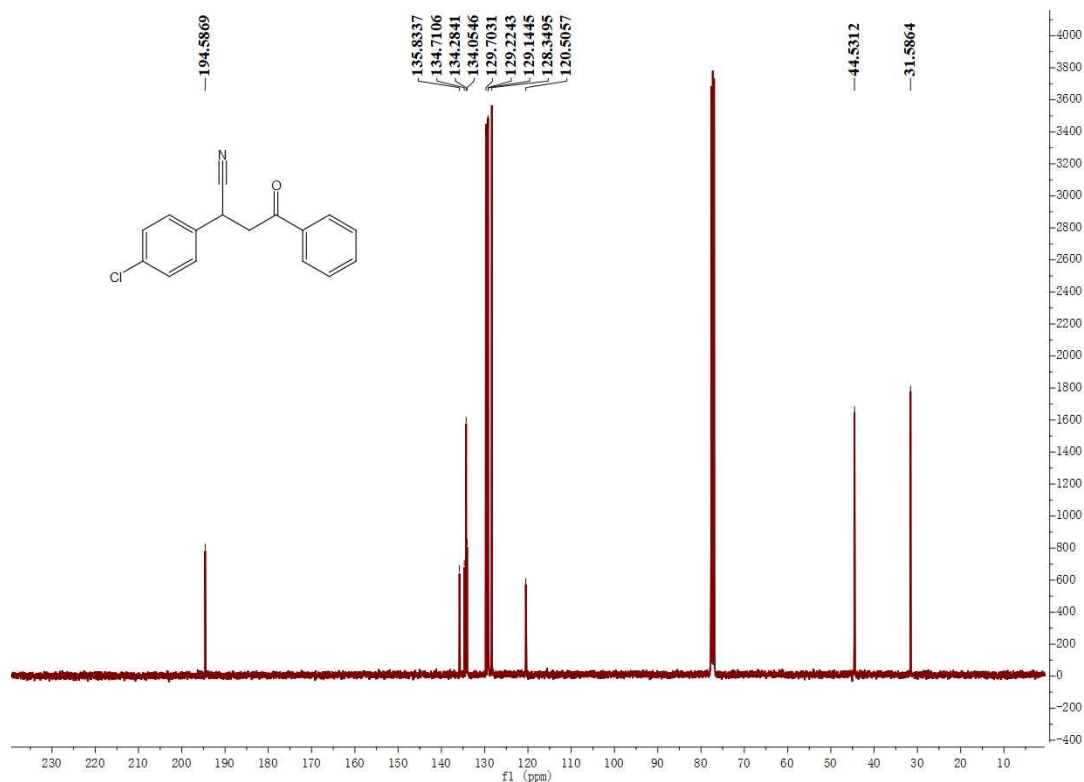

$^1\text{H}$ -NMR Spectrum (400 MHz,  $\text{CDCl}_3$ ) of **7d**

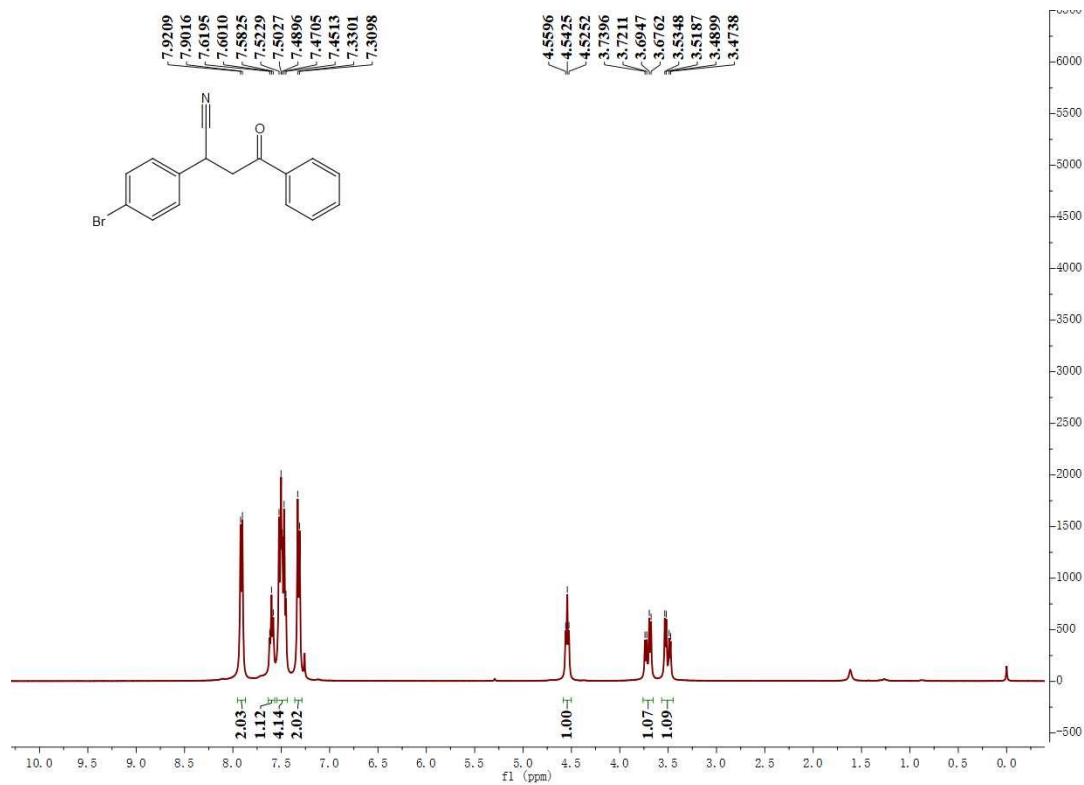

$^{13}\text{C}$ -NMR Spectrum (101 MHz,  $\text{CDCl}_3$ ) of **7d**

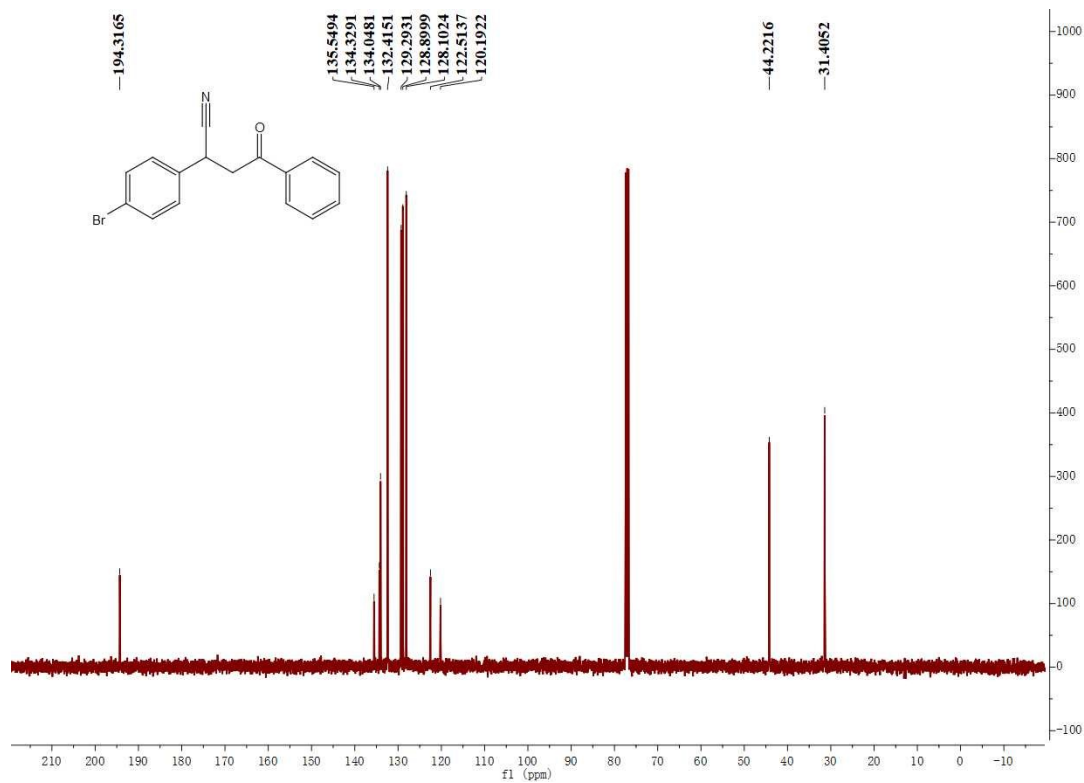

**<sup>1</sup>H-NMR Spectrum (400 MHz, CDCl<sub>3</sub>) of **8d****

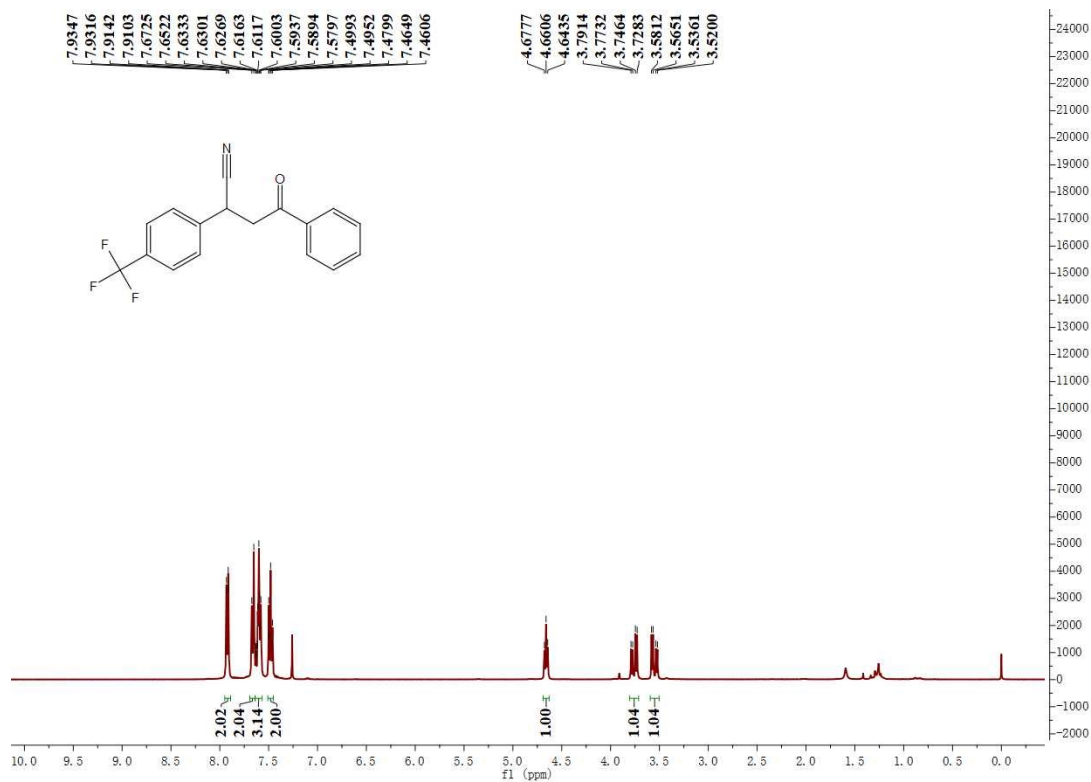

**<sup>13</sup>C-NMR Spectrum (101 MHz, CDCl<sub>3</sub>) of **8d****

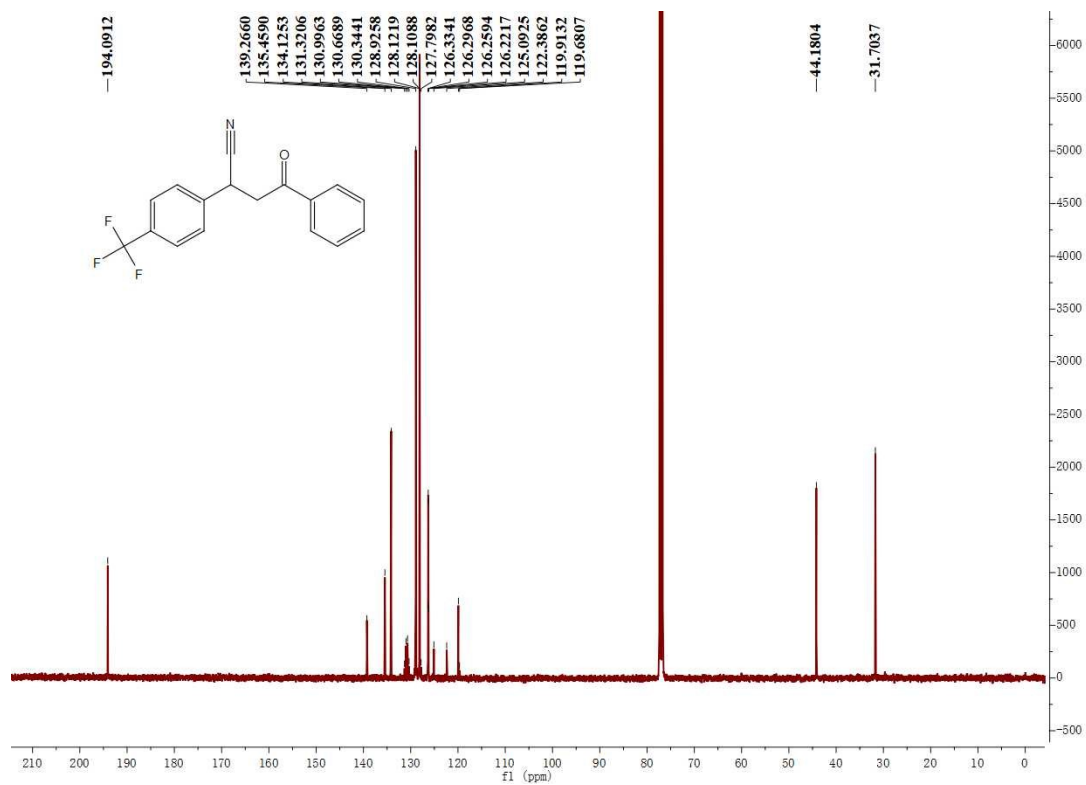

**<sup>19</sup>F-NMR Spectrum (376 MHz, CDCl<sub>3</sub>) of **8d****

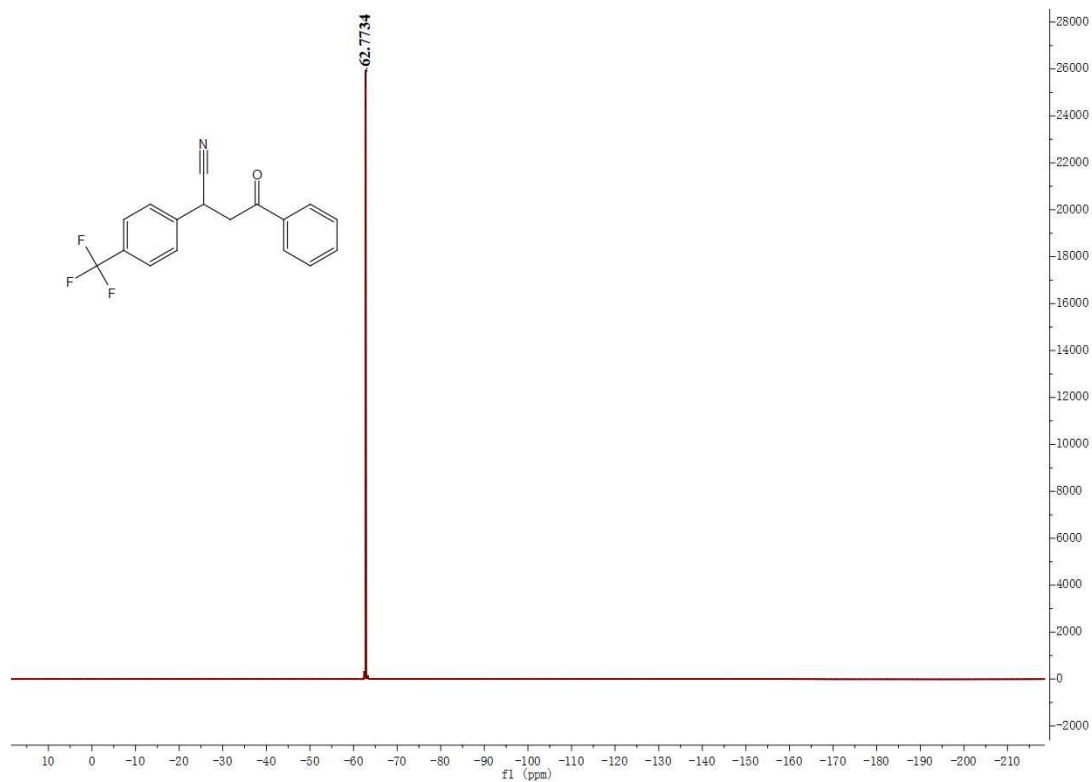

**<sup>1</sup>H-NMR Spectrum (400 MHz, CDCl<sub>3</sub>) of **9d****



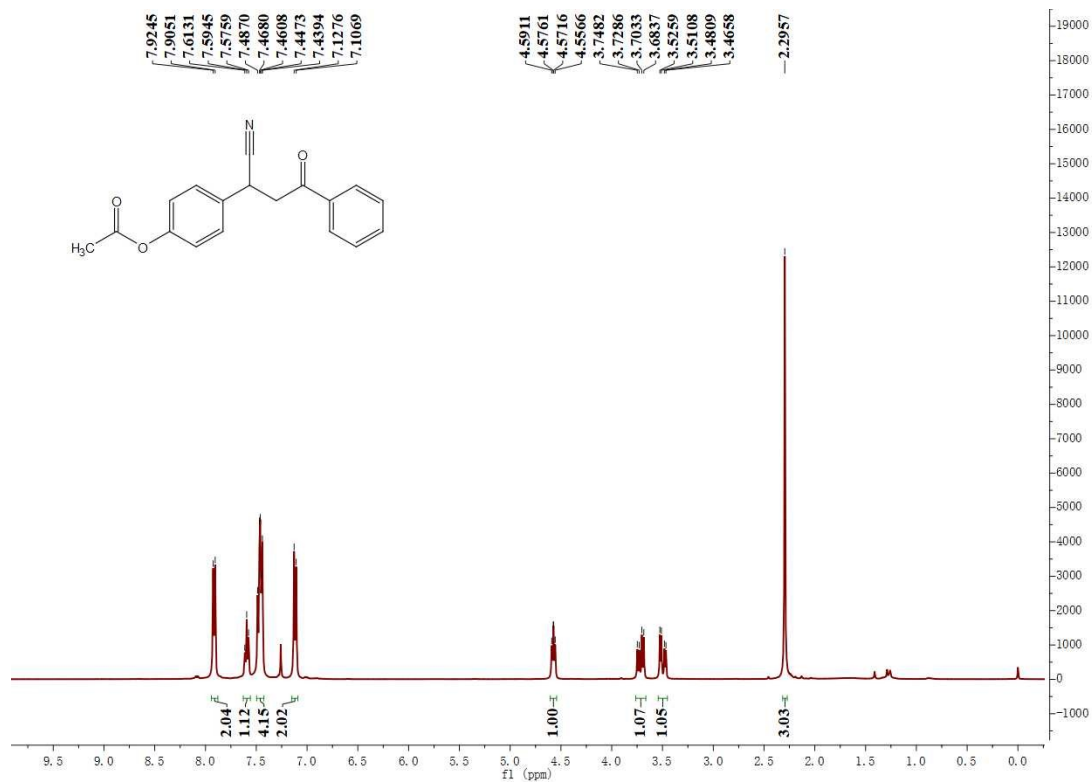

**<sup>13</sup>C-NMR Spectrum (101 MHz, CDCl<sub>3</sub>) of 9d**

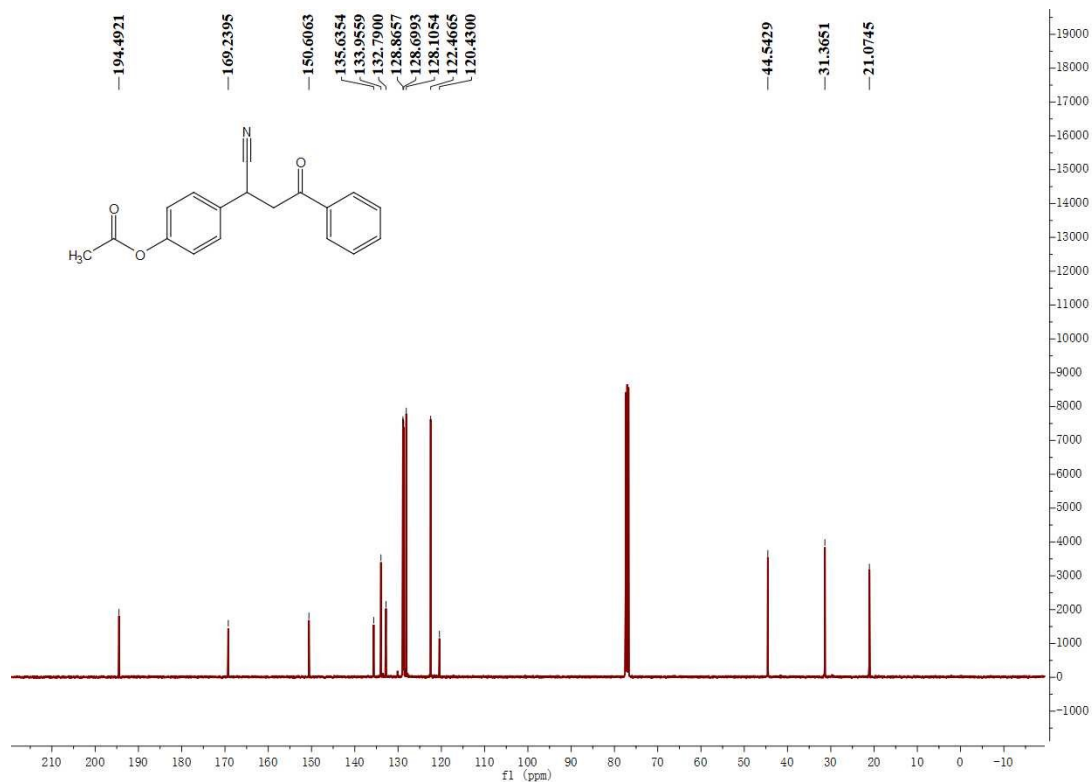

**<sup>1</sup>H-NMR Spectrum (400 MHz, CDCl<sub>3</sub>) of 10d**

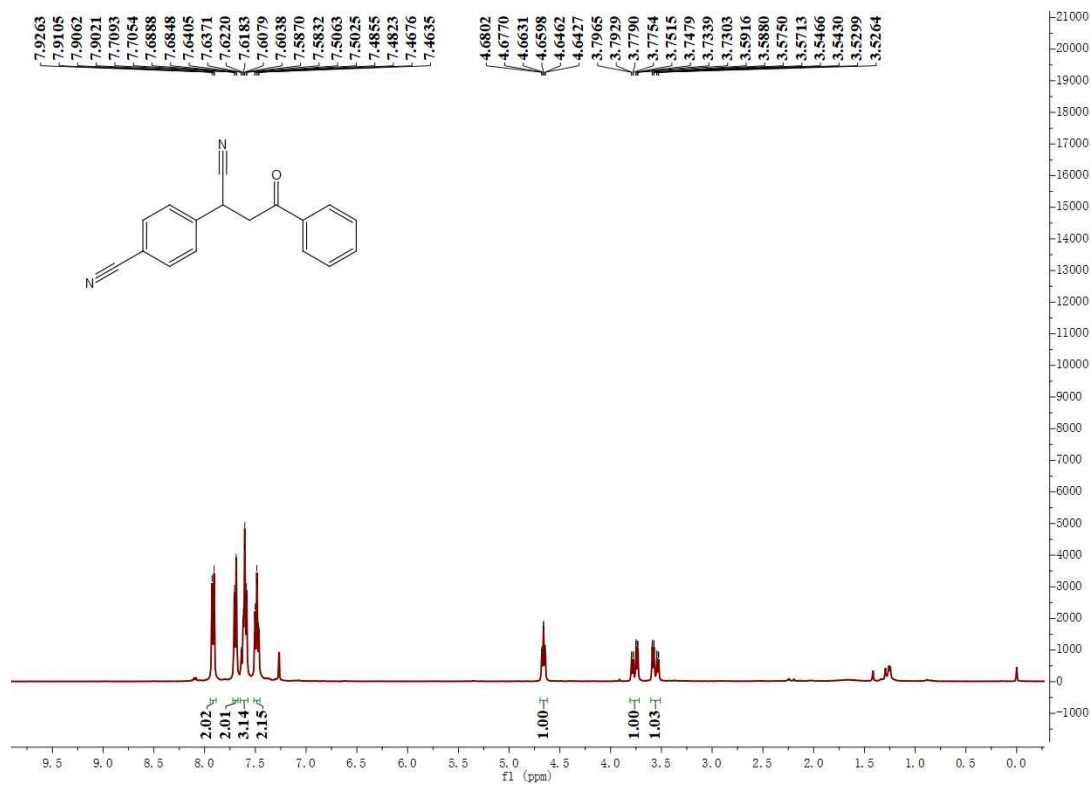

**<sup>13</sup>C-NMR Spectrum (101 MHz, CDCl<sub>3</sub>) of 10d**

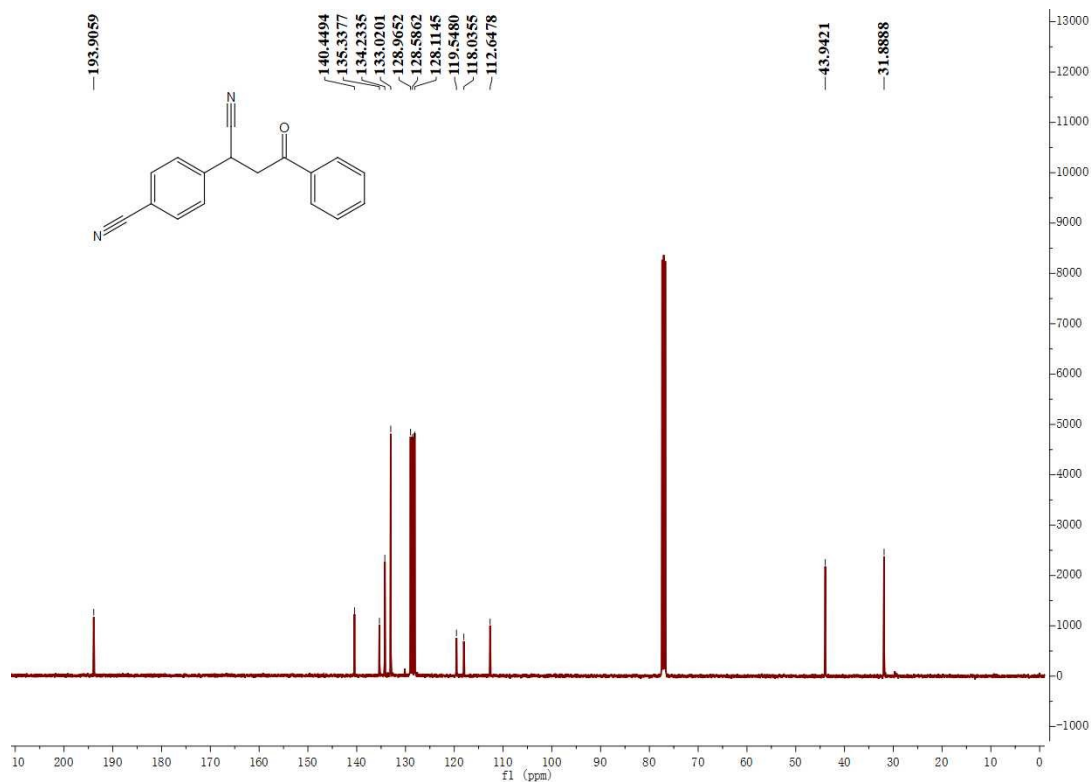

**<sup>1</sup>H-NMR Spectrum (400 MHz, CDCl<sub>3</sub>) of 11d**

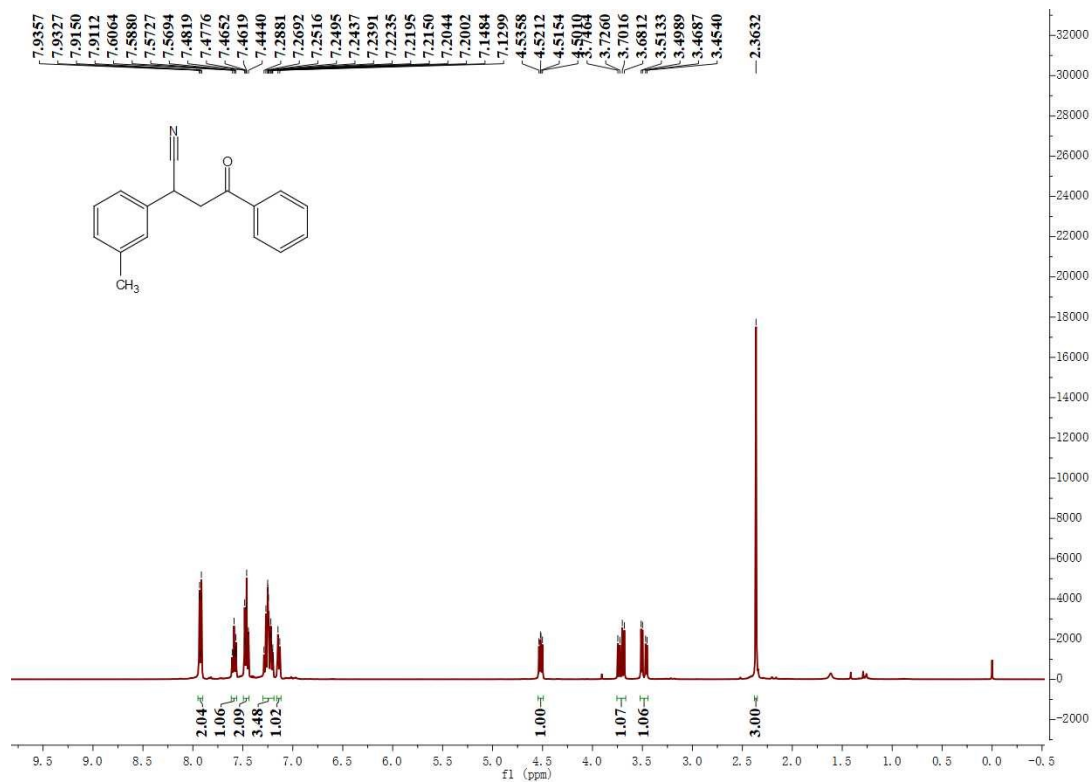

**<sup>13</sup>C-NMR Spectrum (101 MHz, CDCl<sub>3</sub>) of 11d**

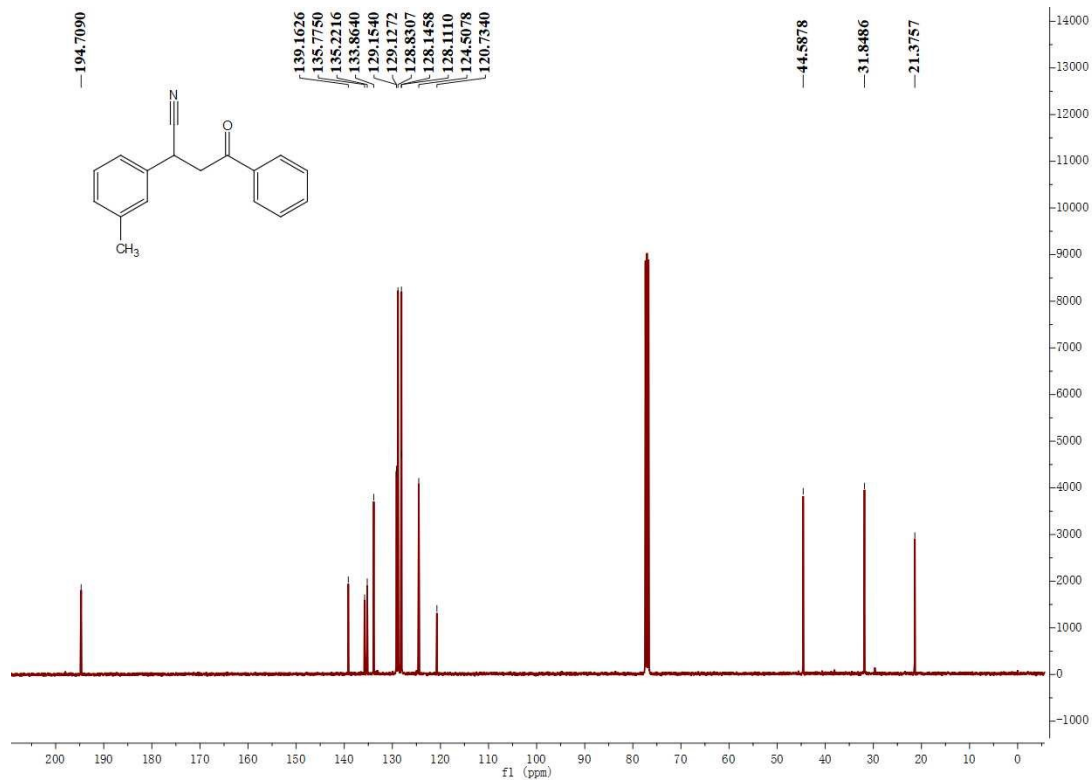

**<sup>1</sup>H-NMR Spectrum (400 MHz, CDCl<sub>3</sub>) of 12d**

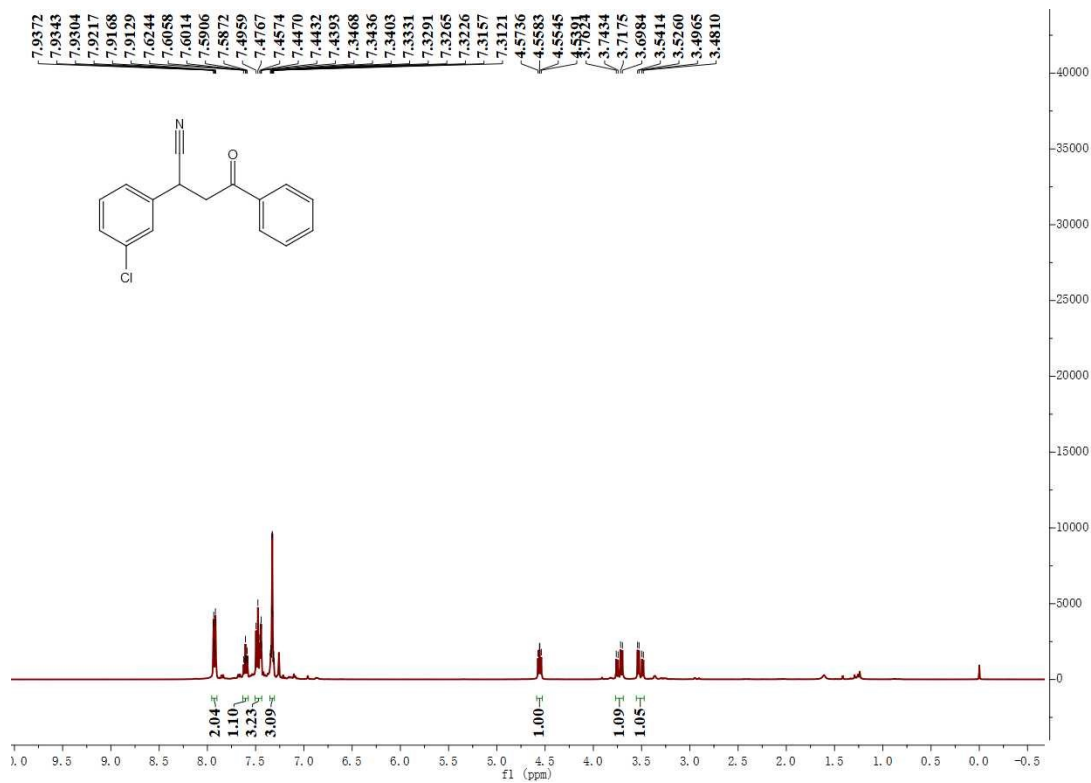

<sup>13</sup>C-NMR Spectrum (101 MHz, CDCl<sub>3</sub>) of **12d**

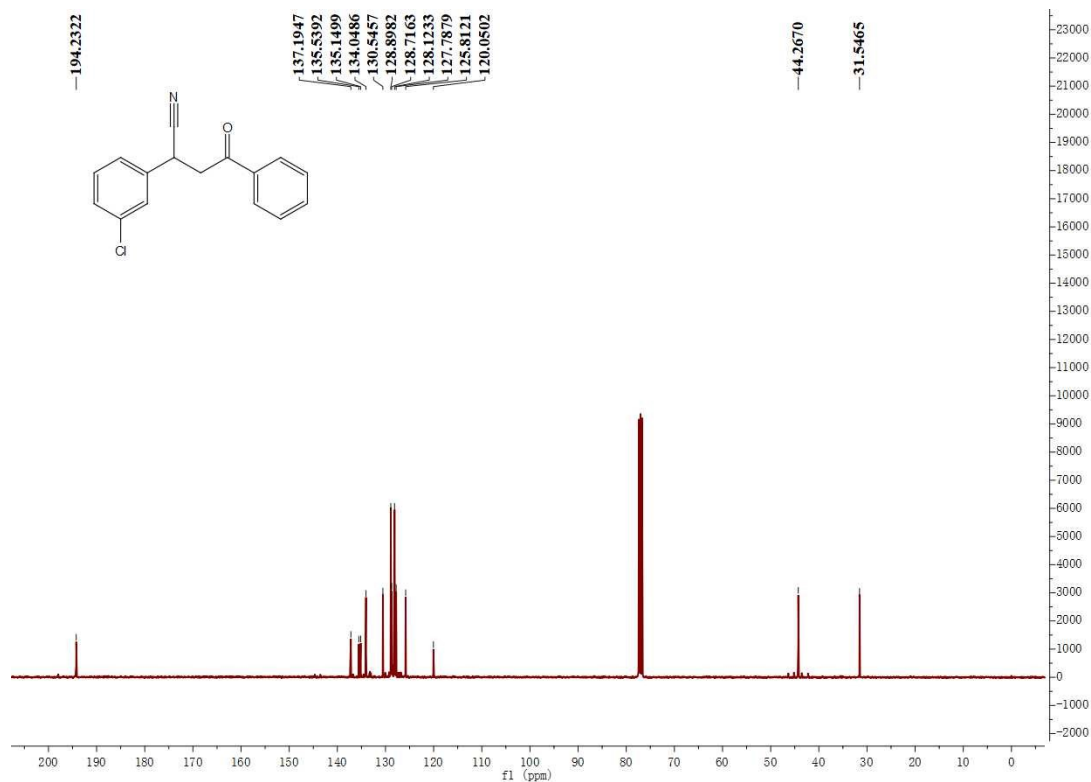

<sup>1</sup>H-NMR Spectrum (400 MHz, CDCl<sub>3</sub>) of **13d**

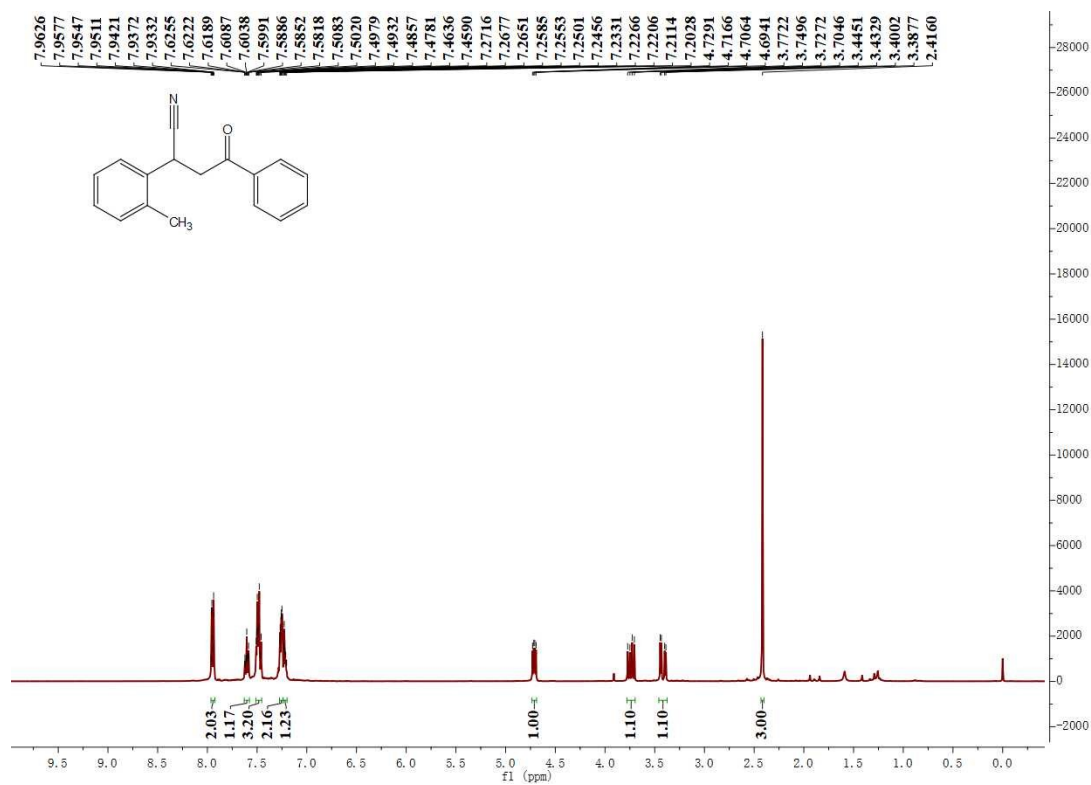

**<sup>13</sup>C-NMR Spectrum (101 MHz, CDCl<sub>3</sub>) of 13d**

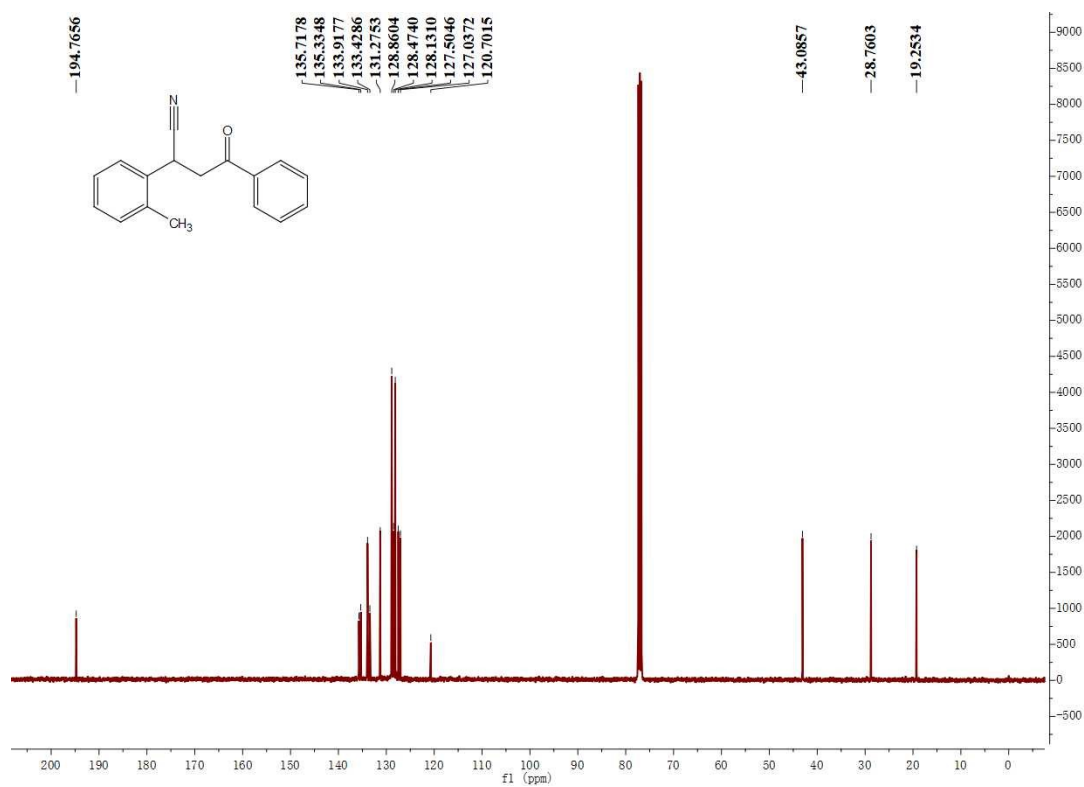

**<sup>1</sup>H-NMR Spectrum (400 MHz, CDCl<sub>3</sub>) of 14d**

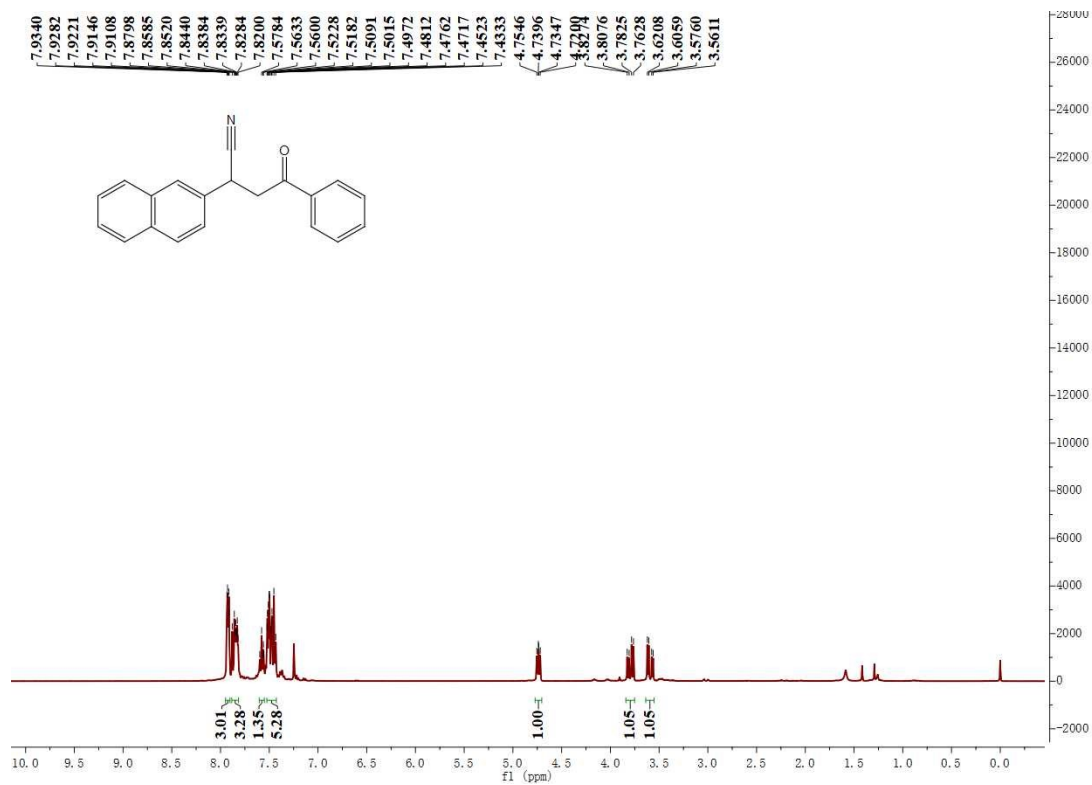

<sup>13</sup>C-NMR Spectrum (101 MHz, CDCl<sub>3</sub>) of **14d**

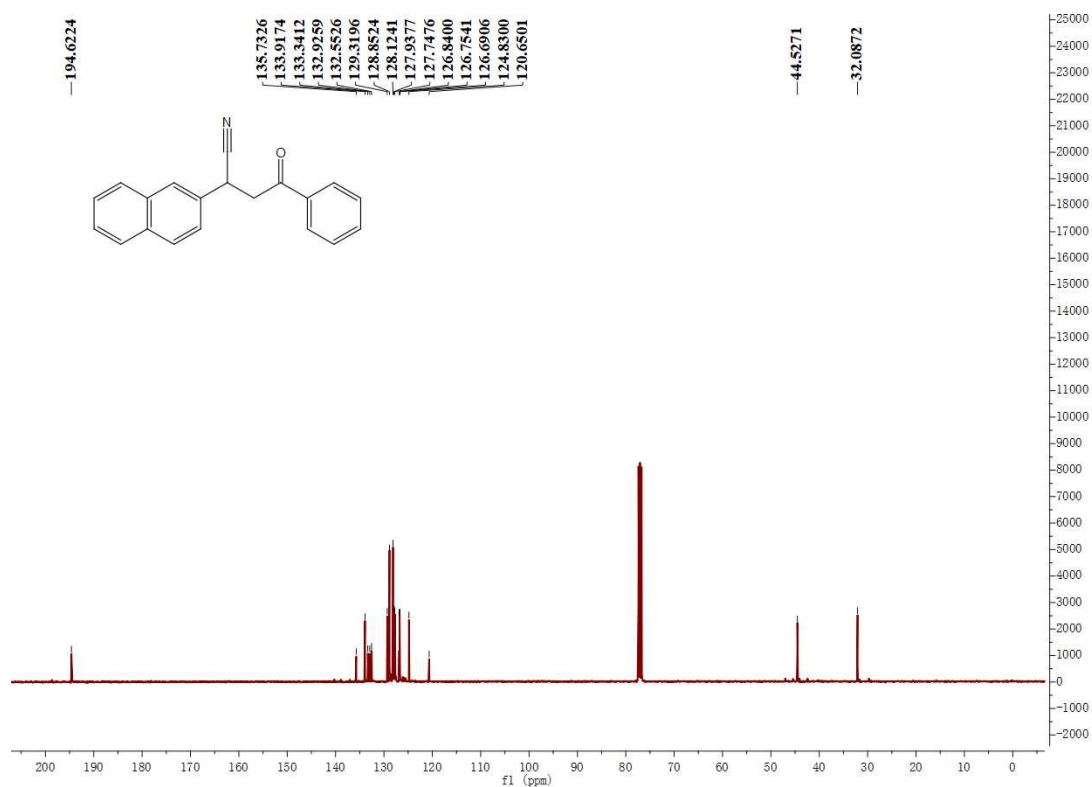

<sup>1</sup>H-NMR Spectrum (600 MHz, CDCl<sub>3</sub>) of **15d**

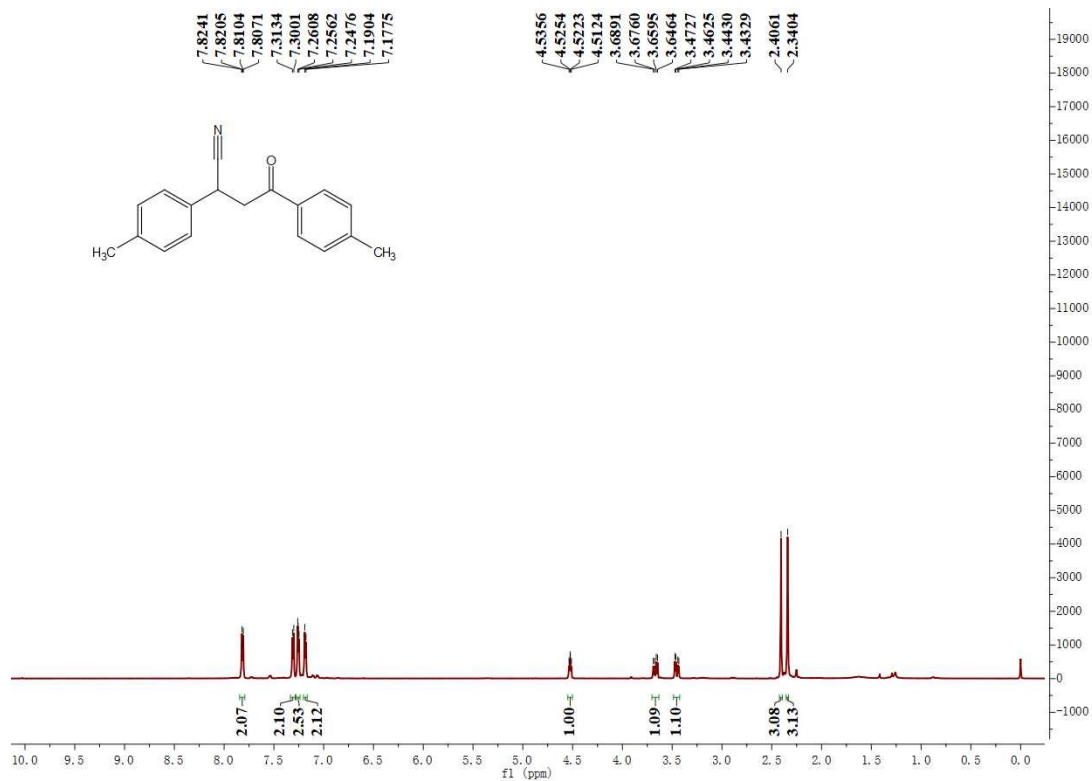

**<sup>13</sup>C-NMR Spectrum (101 MHz, CDCl<sub>3</sub>) of 15d**

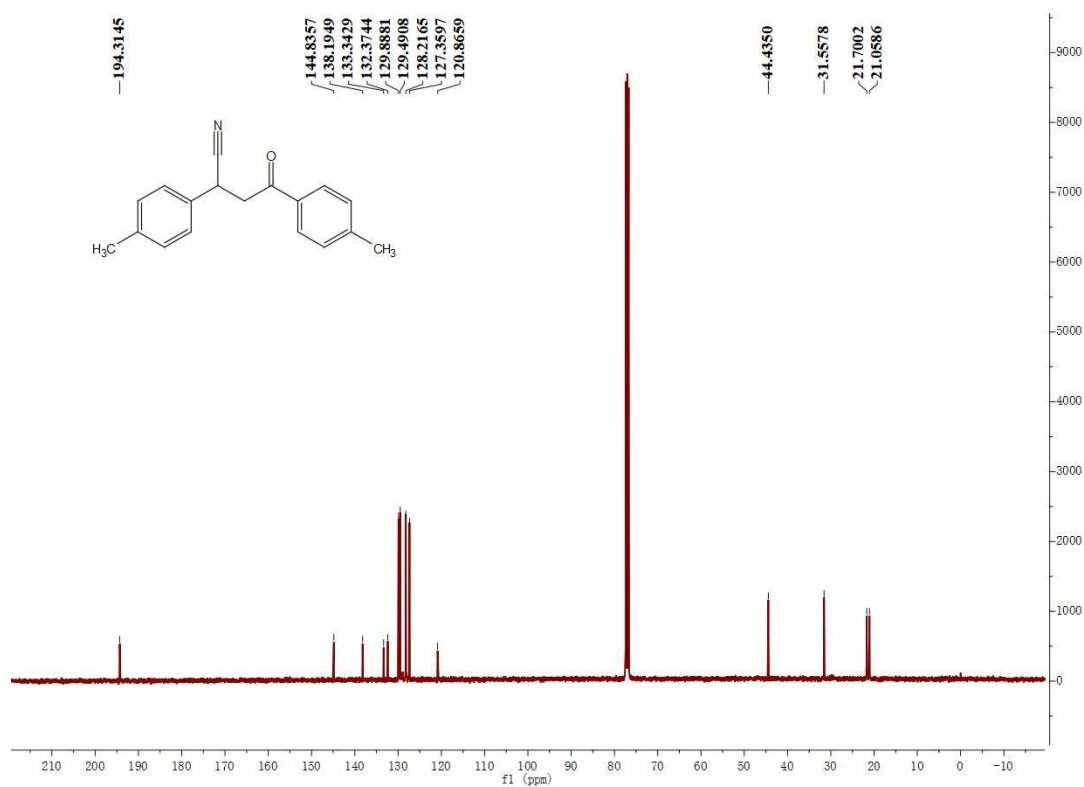

**<sup>1</sup>H-NMR Spectrum (600 MHz, CDCl<sub>3</sub>) of 16d**

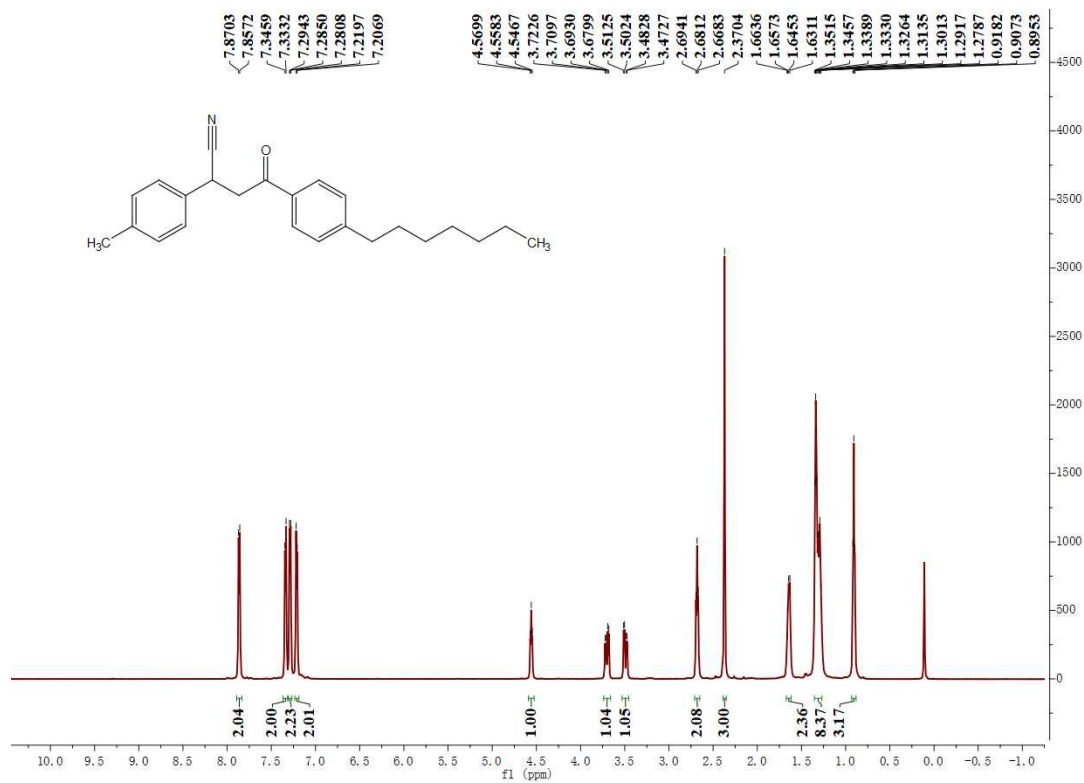

**<sup>13</sup>C-NMR Spectrum (101 MHz, CDCl<sub>3</sub>) of 16d**

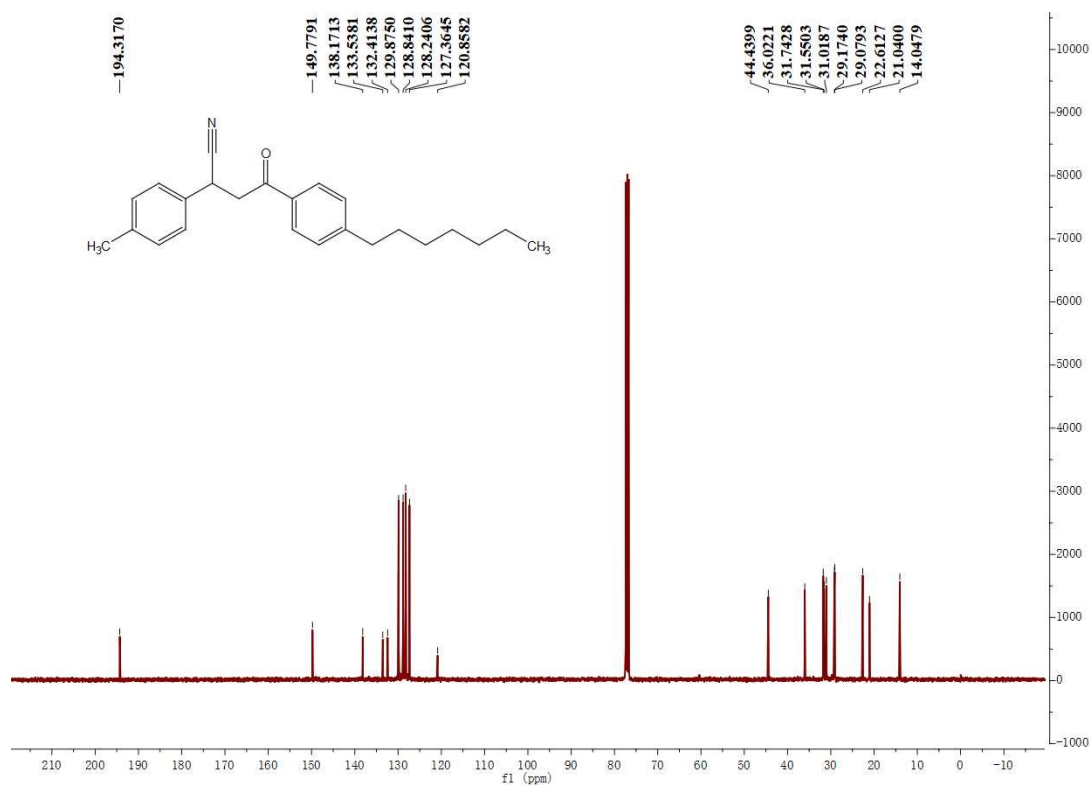

**<sup>1</sup>H-NMR Spectrum (400 MHz, CDCl<sub>3</sub>) of 17d**



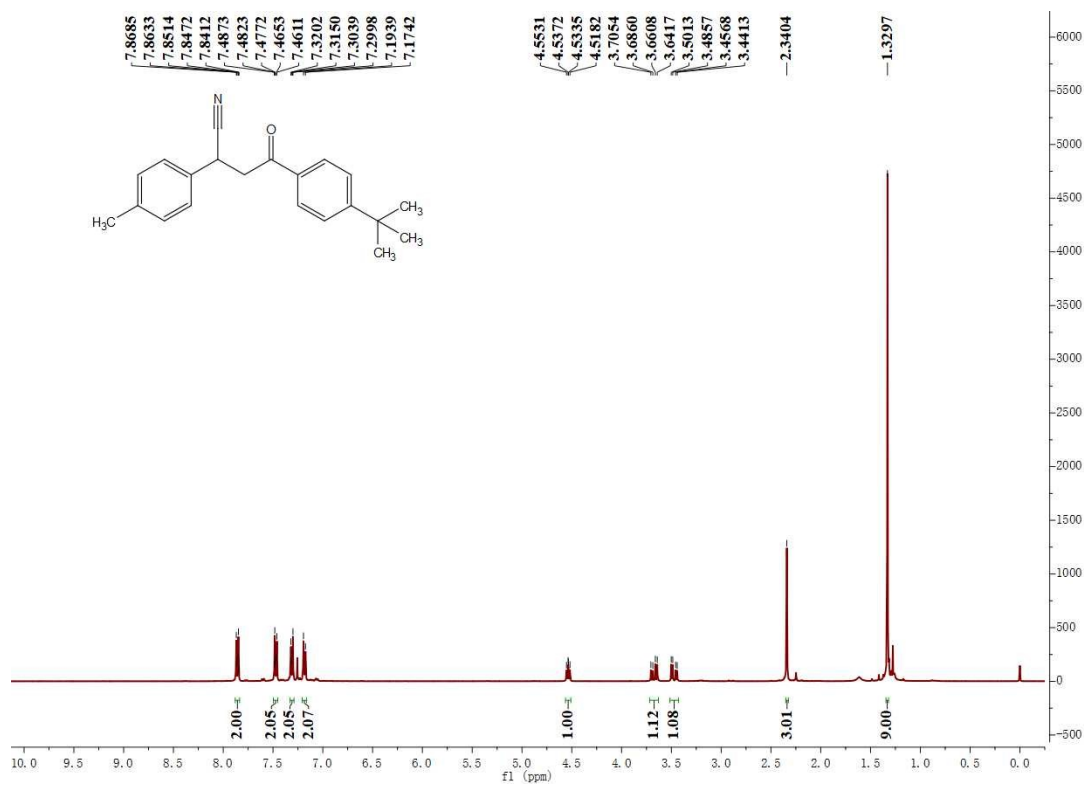

**<sup>13</sup>C-NMR Spectrum (101 MHz, CDCl<sub>3</sub>) of 17d**

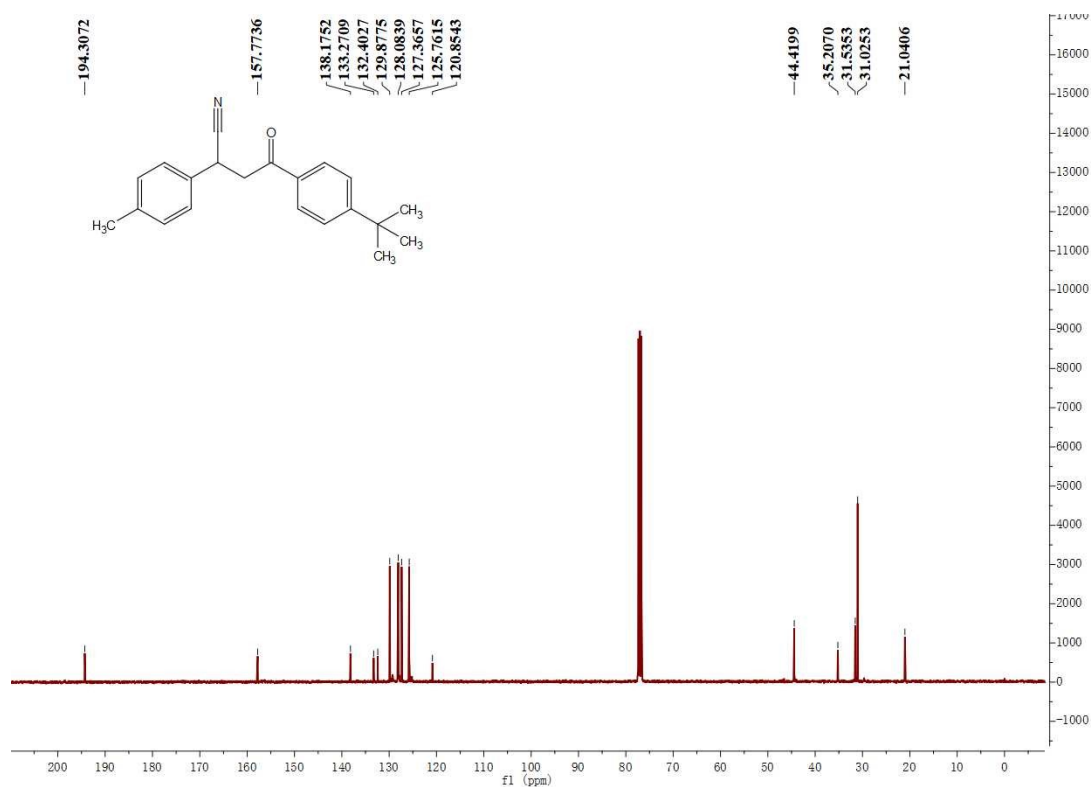

**<sup>1</sup>H-NMR Spectrum (400 MHz, CDCl<sub>3</sub>) of 18d**

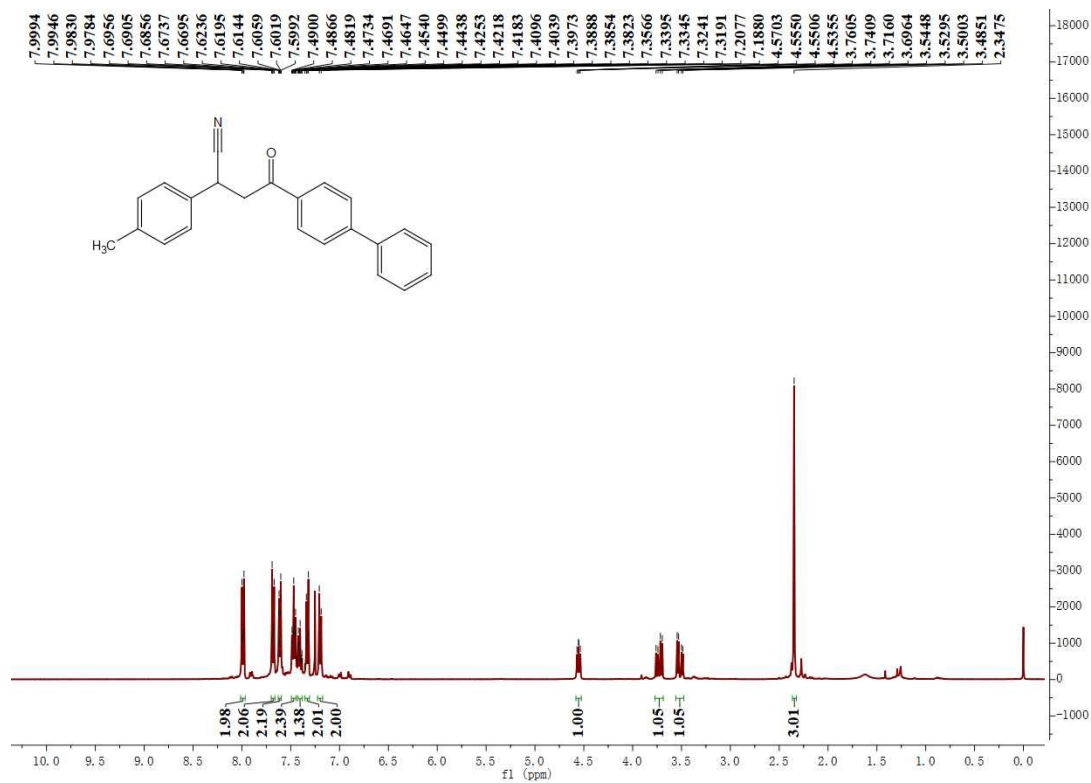

**<sup>13</sup>C-NMR Spectrum (101 MHz, CDCl<sub>3</sub>) of 18d**

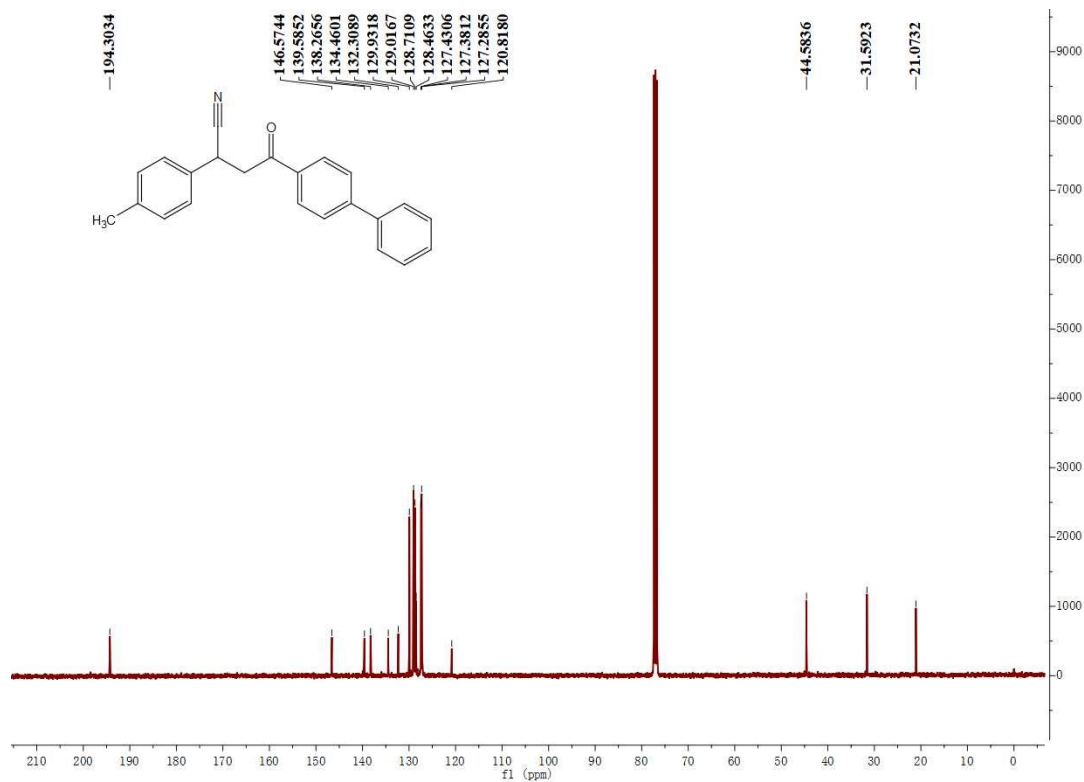

**<sup>1</sup>H-NMR Spectrum (400 MHz, CDCl<sub>3</sub>) of 19d**

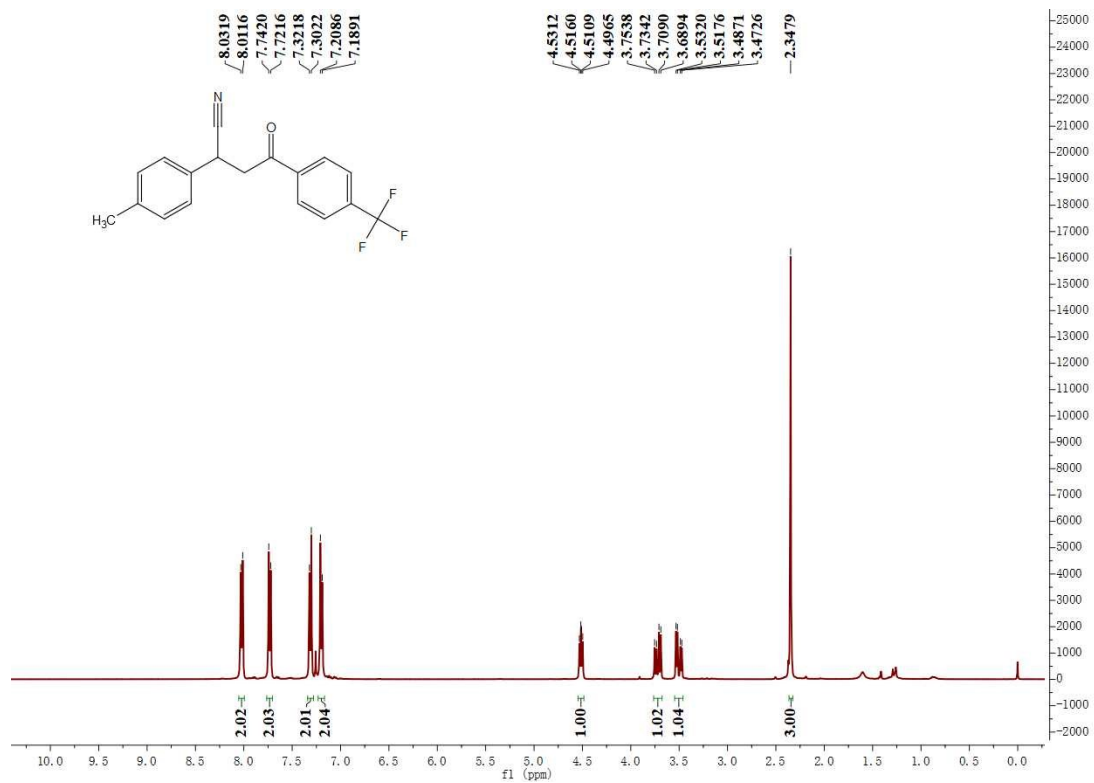

**<sup>13</sup>C-NMR Spectrum (101 MHz, CDCl<sub>3</sub>) of 19d**

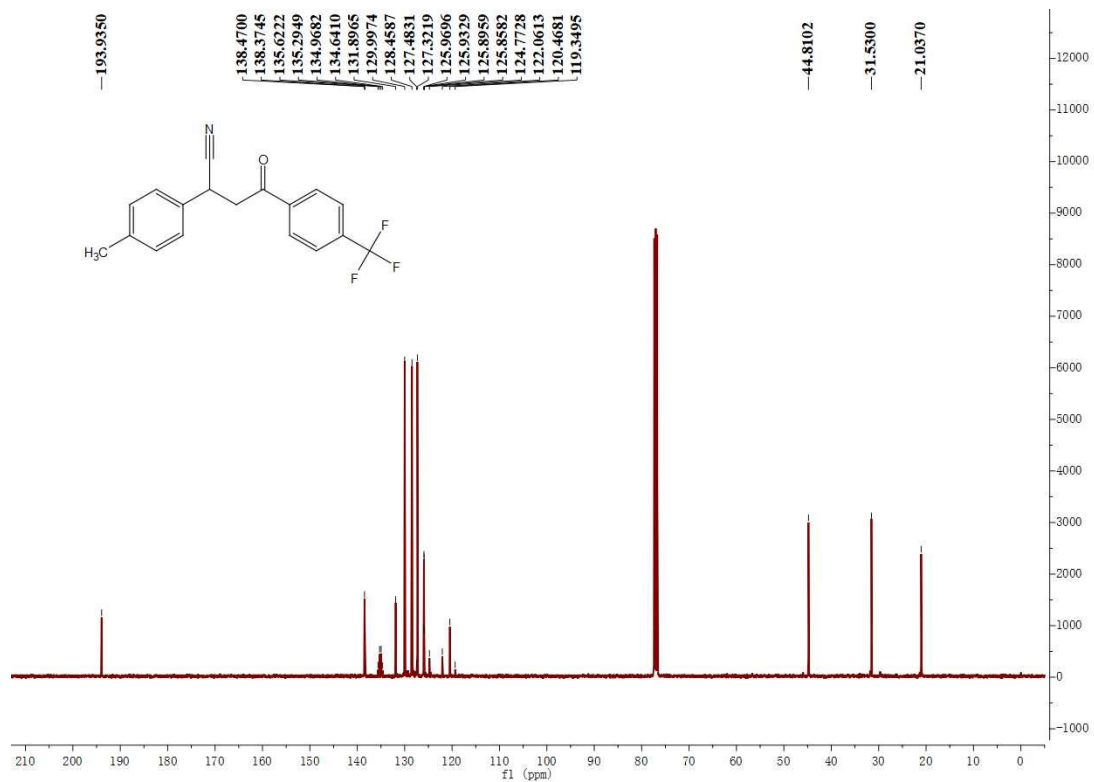

**<sup>19</sup>F-NMR Spectrum (376 MHz, CDCl<sub>3</sub>) of 19d**

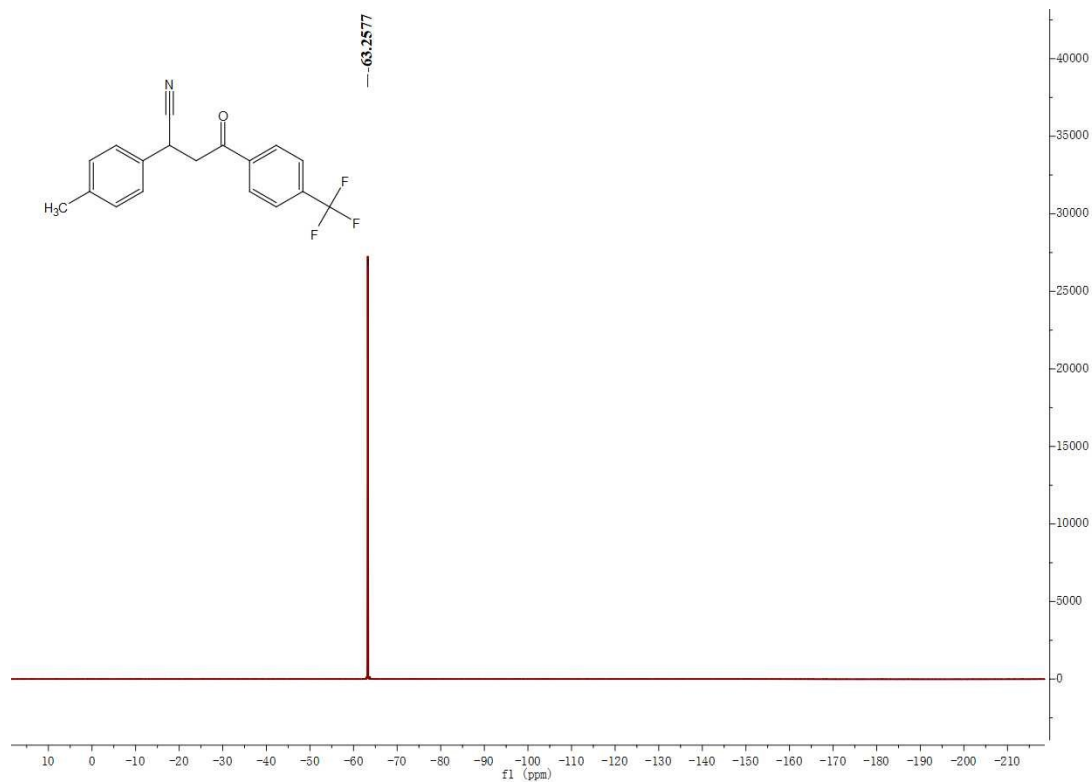

**<sup>1</sup>H-NMR Spectrum (600 MHz, CDCl<sub>3</sub>) of 20d**

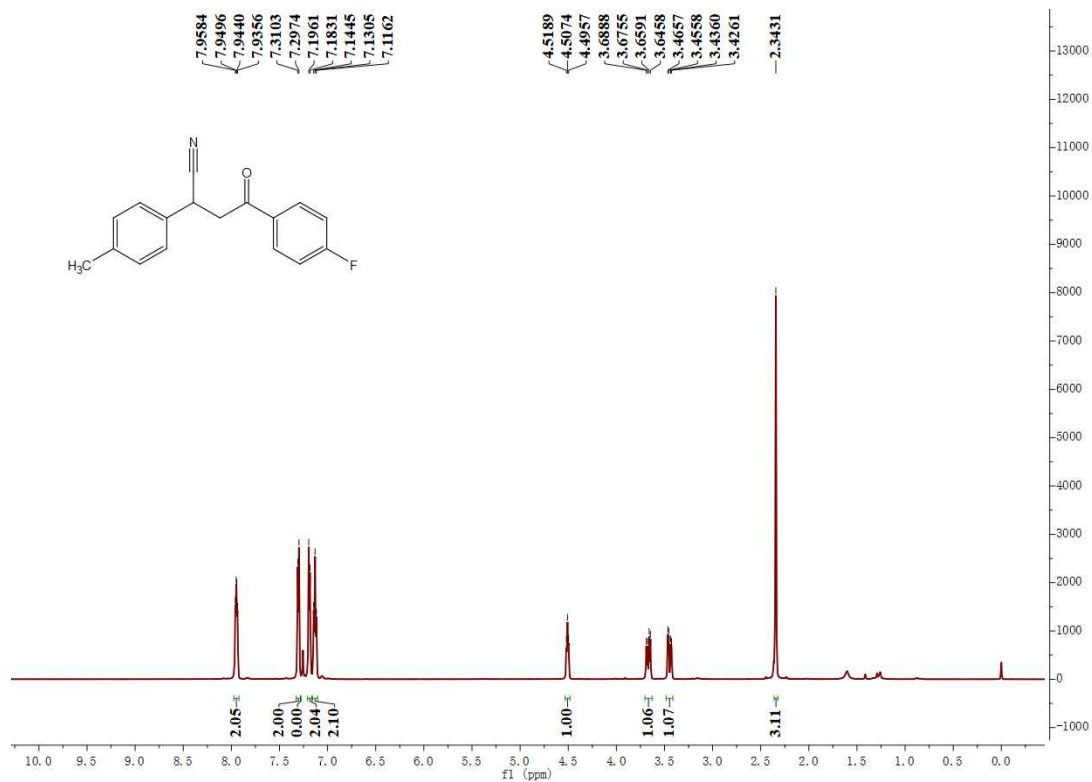

**<sup>13</sup>C-NMR Spectrum (101 MHz, CDCl<sub>3</sub>) of 20d**

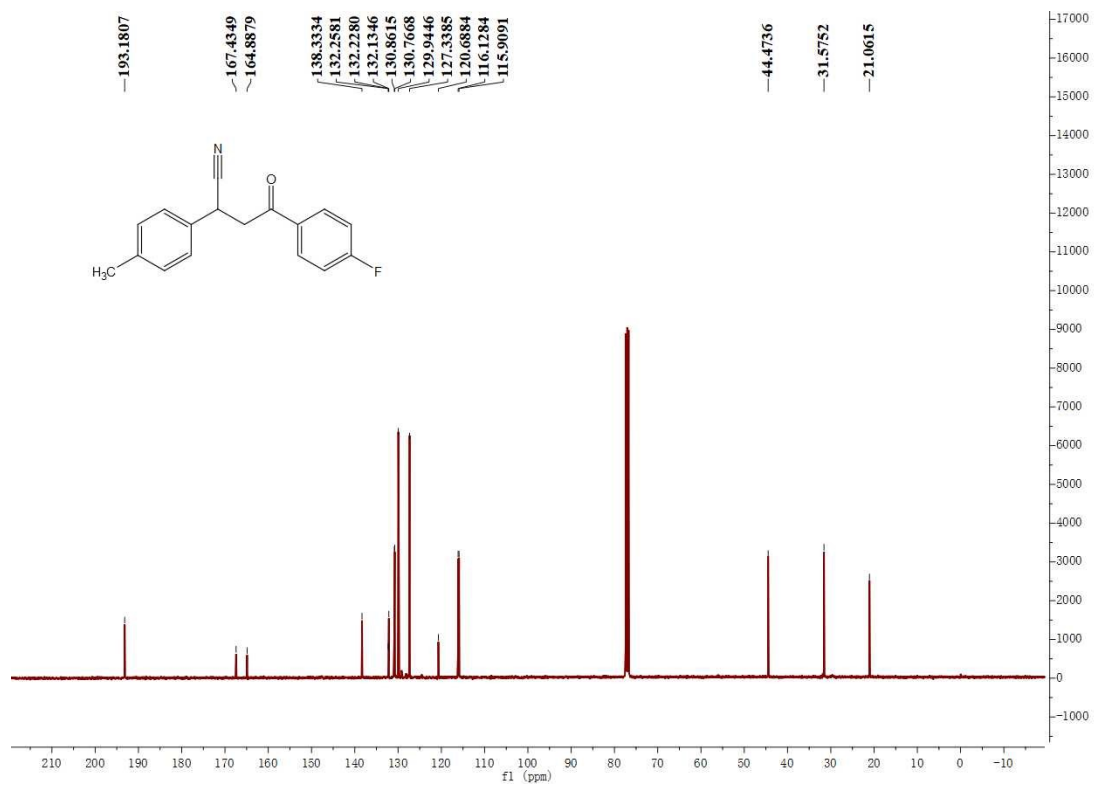

<sup>19</sup>F-NMR Spectrum (376 MHz, CDCl<sub>3</sub>) of 20d

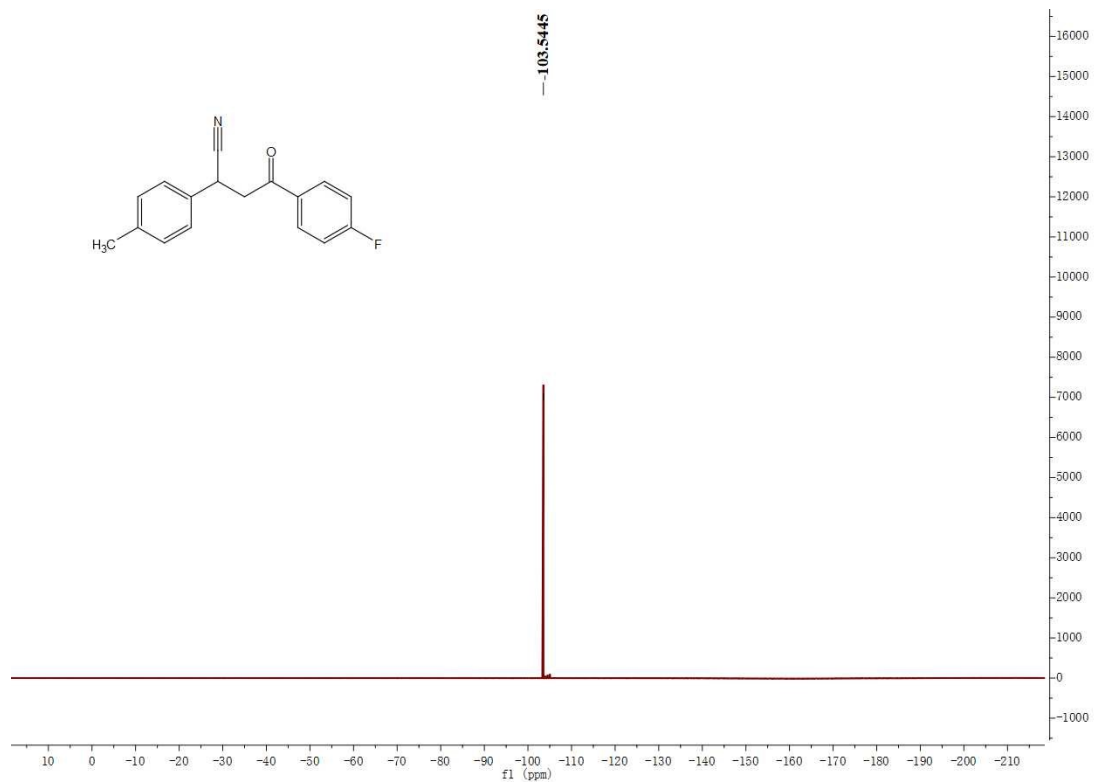

<sup>1</sup>H-NMR Spectrum (600 MHz, CDCl<sub>3</sub>) of 21d

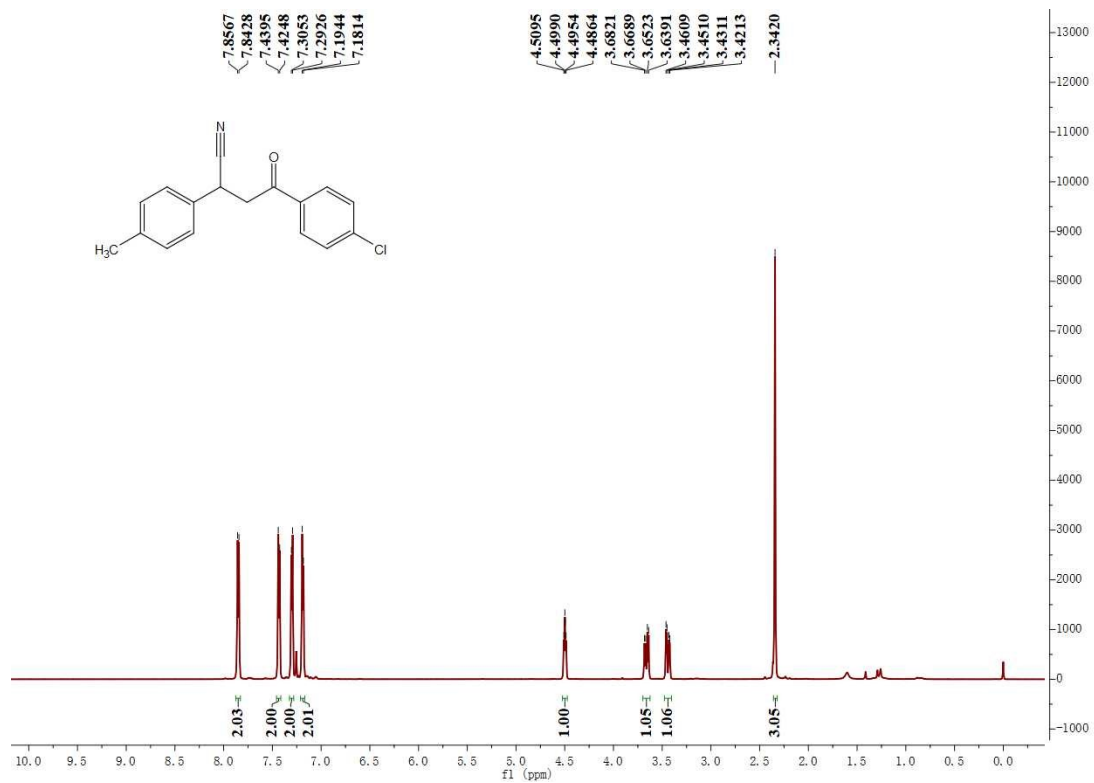

<sup>13</sup>C-NMR Spectrum (101 MHz, CDCl<sub>3</sub>) of **21d**

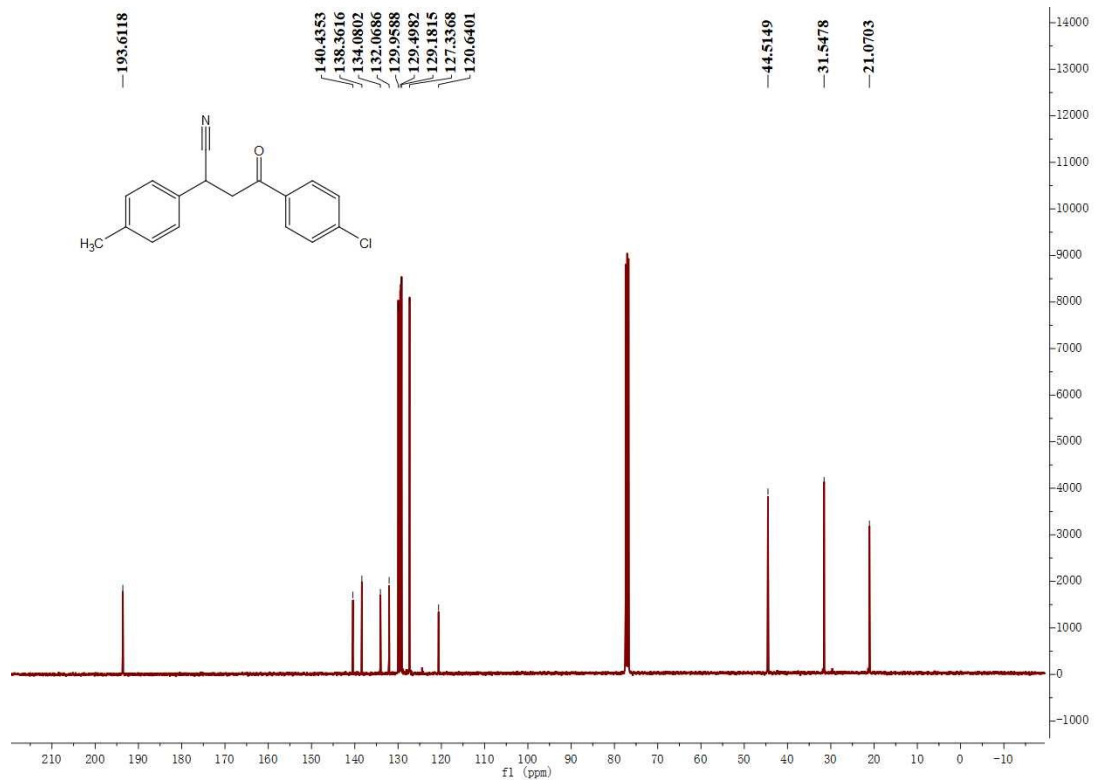

<sup>1</sup>H-NMR Spectrum (400 MHz, CDCl<sub>3</sub>) of **22d**

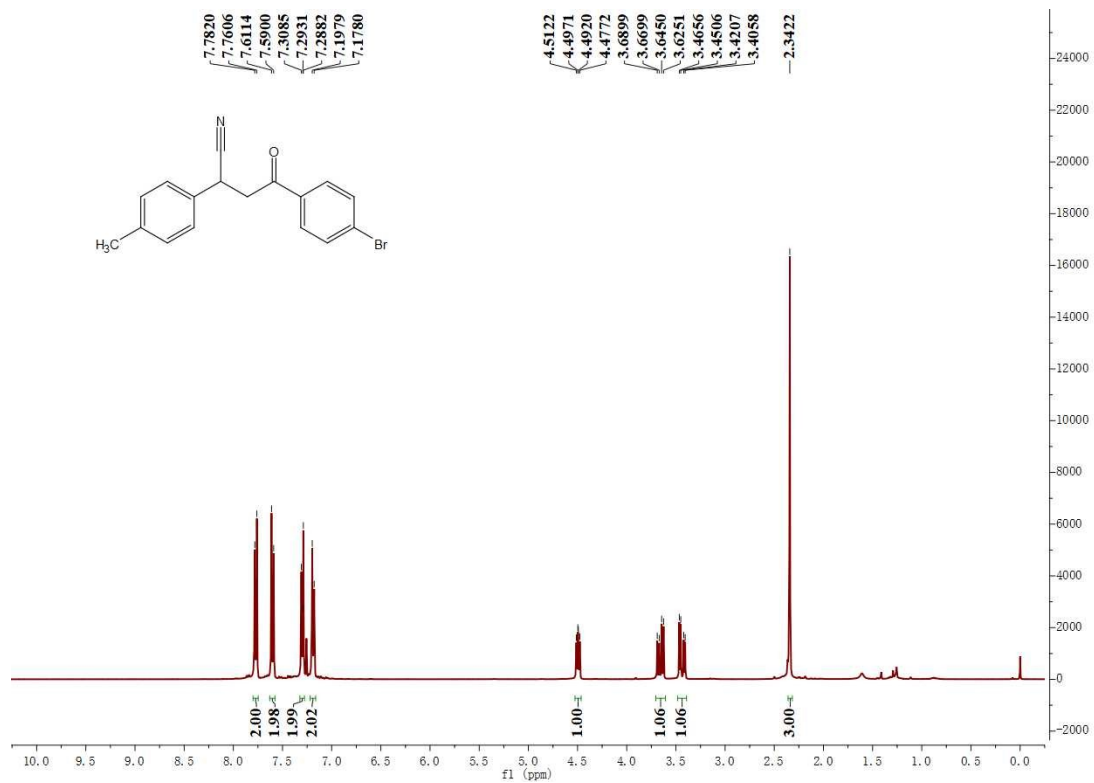

**<sup>13</sup>C-NMR Spectrum (101 MHz, CDCl<sub>3</sub>) of 22d**

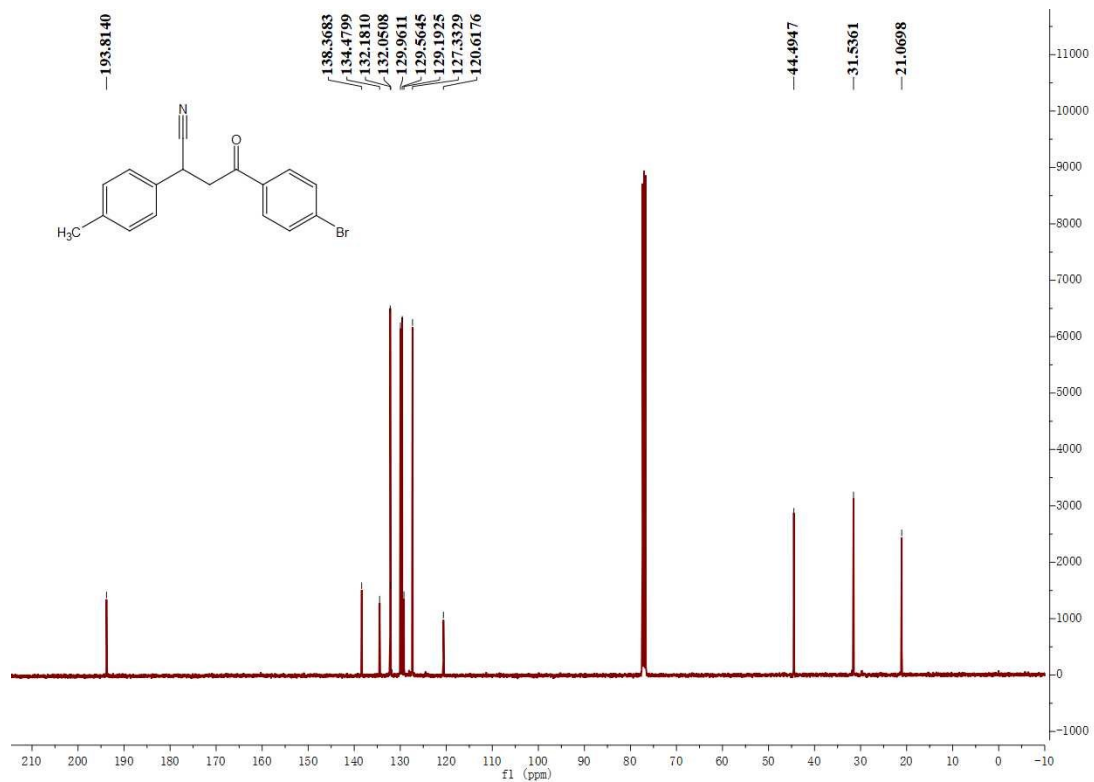

**<sup>1</sup>H-NMR Spectrum (400 MHz, CDCl<sub>3</sub>) of 23d**

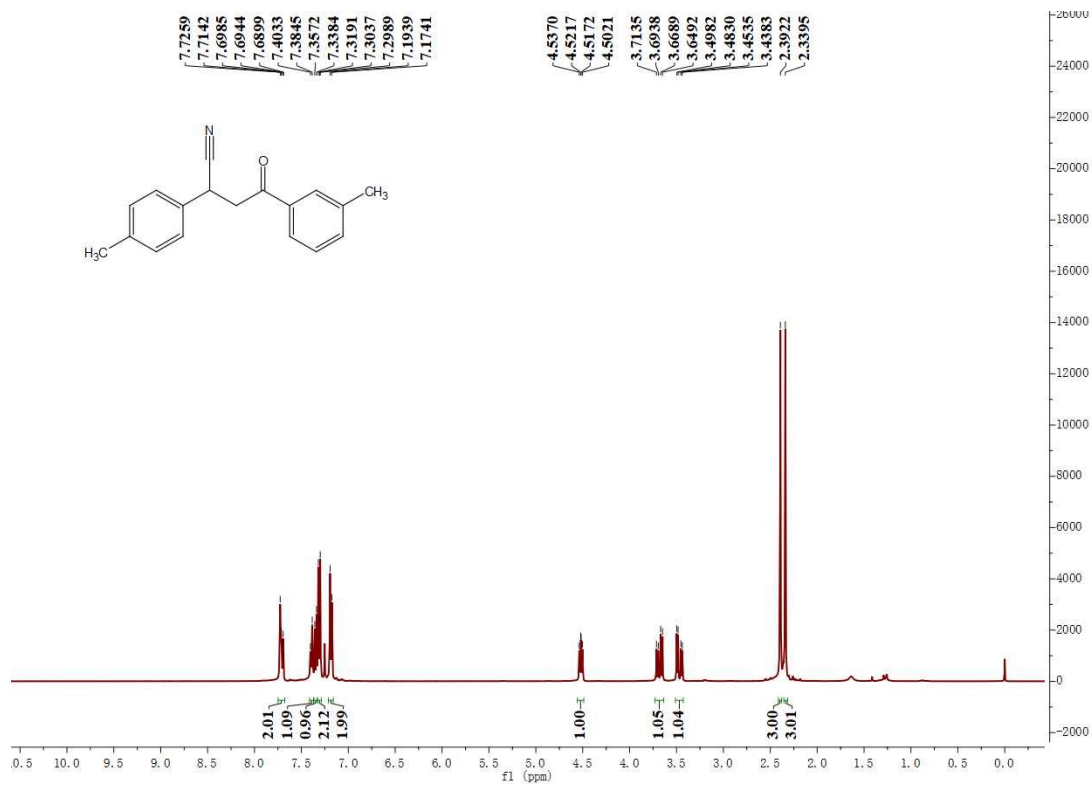

**<sup>13</sup>C-NMR Spectrum (101 MHz, CDCl<sub>3</sub>) of 23d**

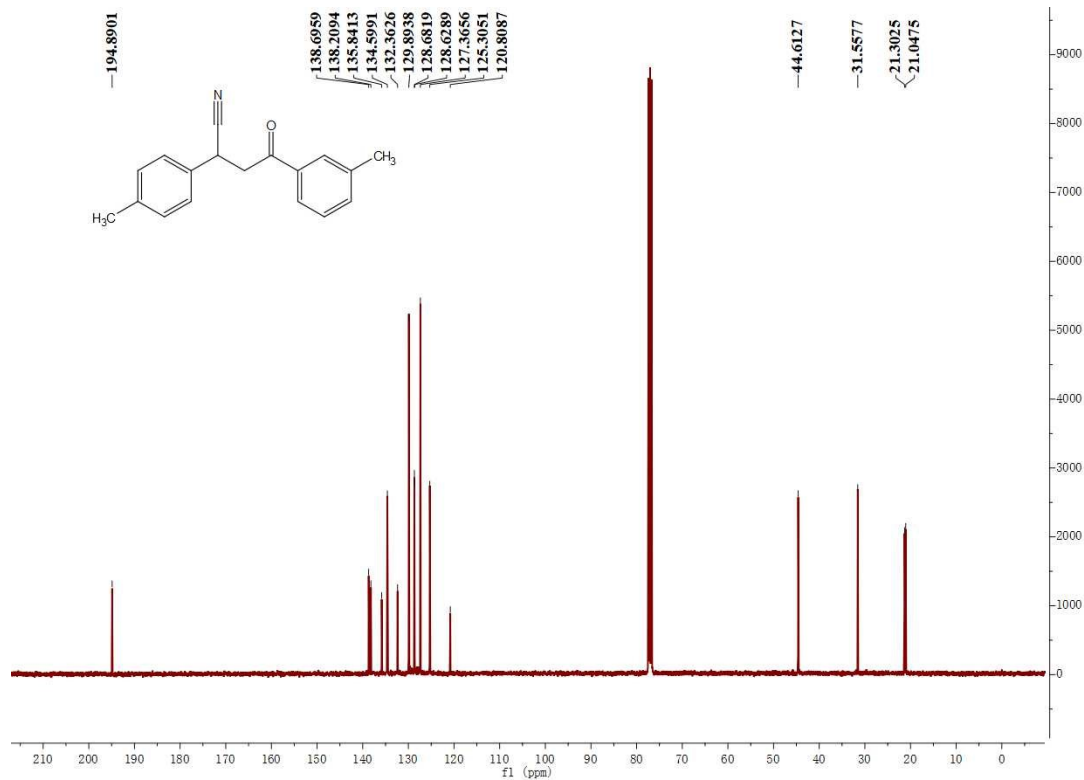

**<sup>1</sup>H-NMR Spectrum (400 MHz, CDCl<sub>3</sub>) of 24d**



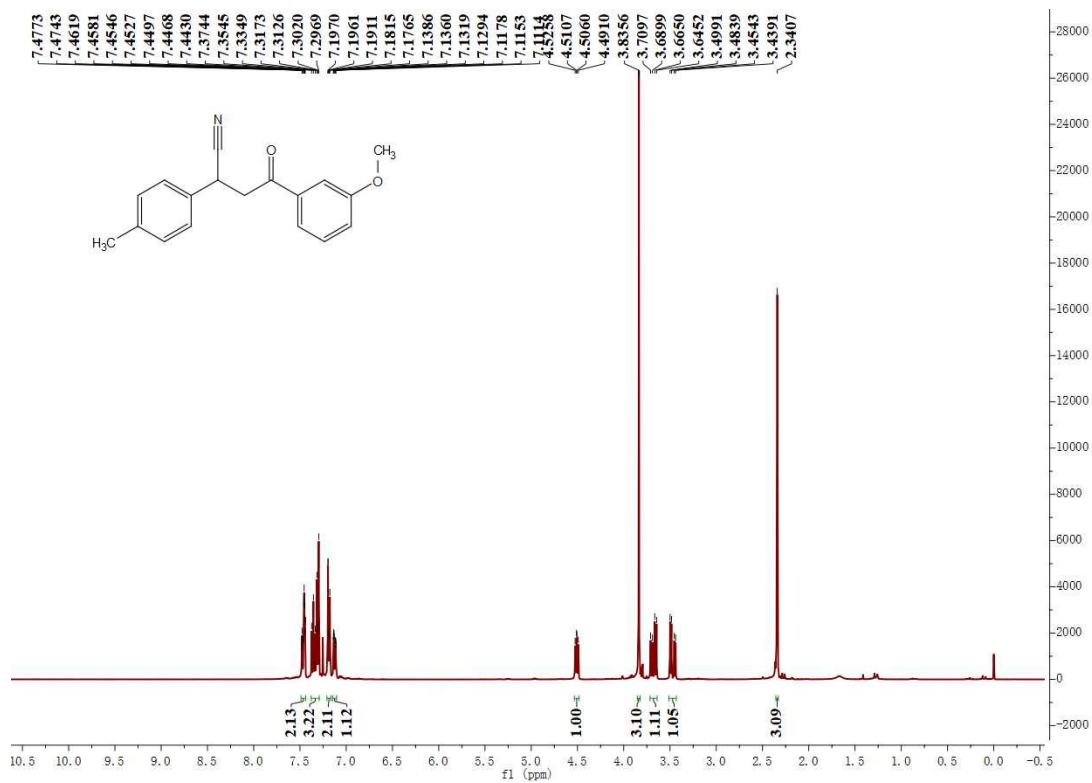

**<sup>13</sup>C-NMR Spectrum (101 MHz, CDCl<sub>3</sub>) of 24d**

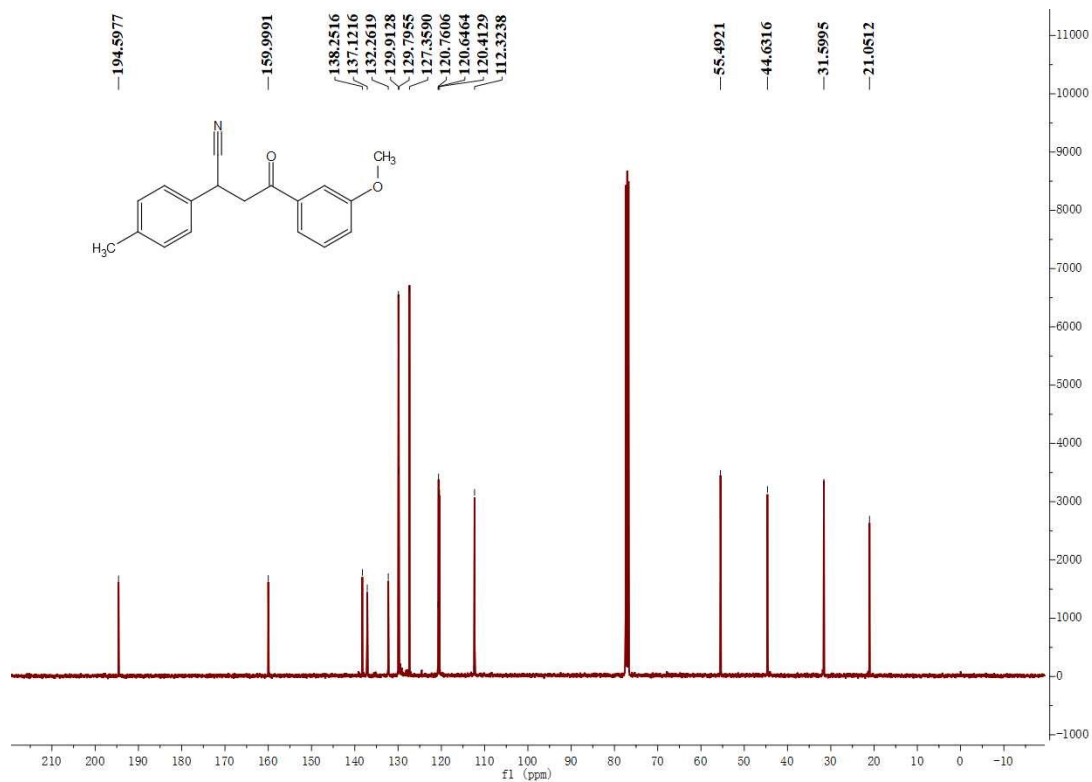

**<sup>1</sup>H-NMR Spectrum (400 MHz, CDCl<sub>3</sub>) of 25d**

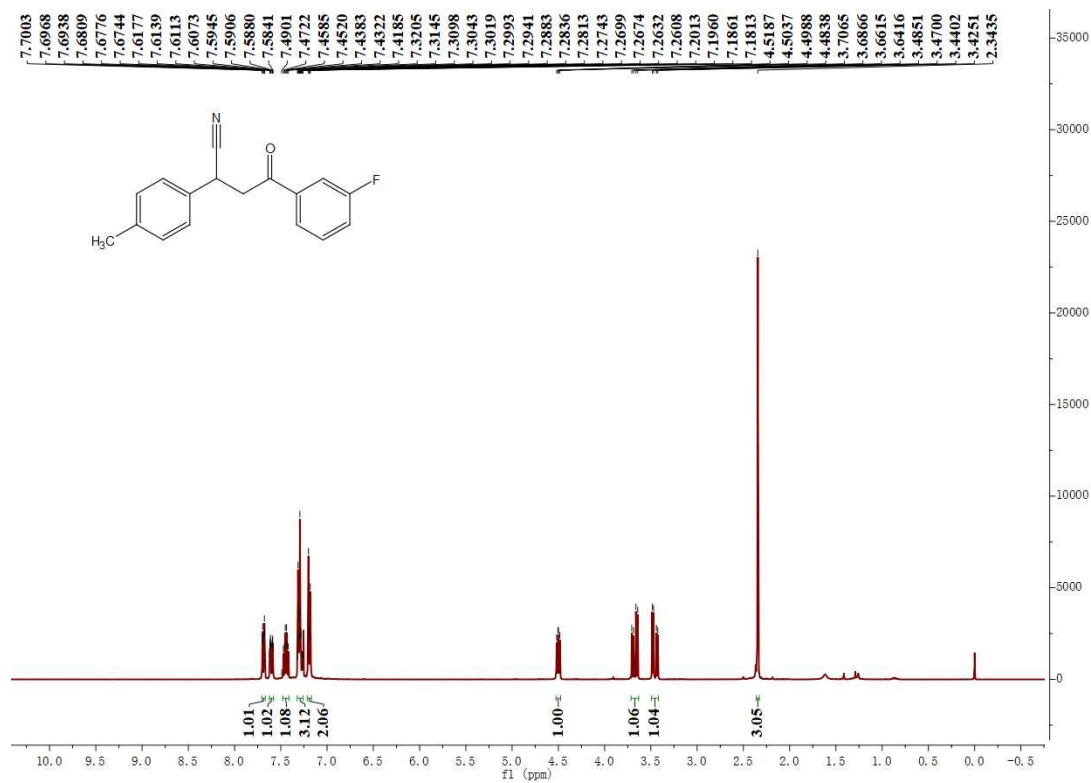

<sup>13</sup>C-NMR Spectrum (101 MHz, CDCl<sub>3</sub>) of **25d**

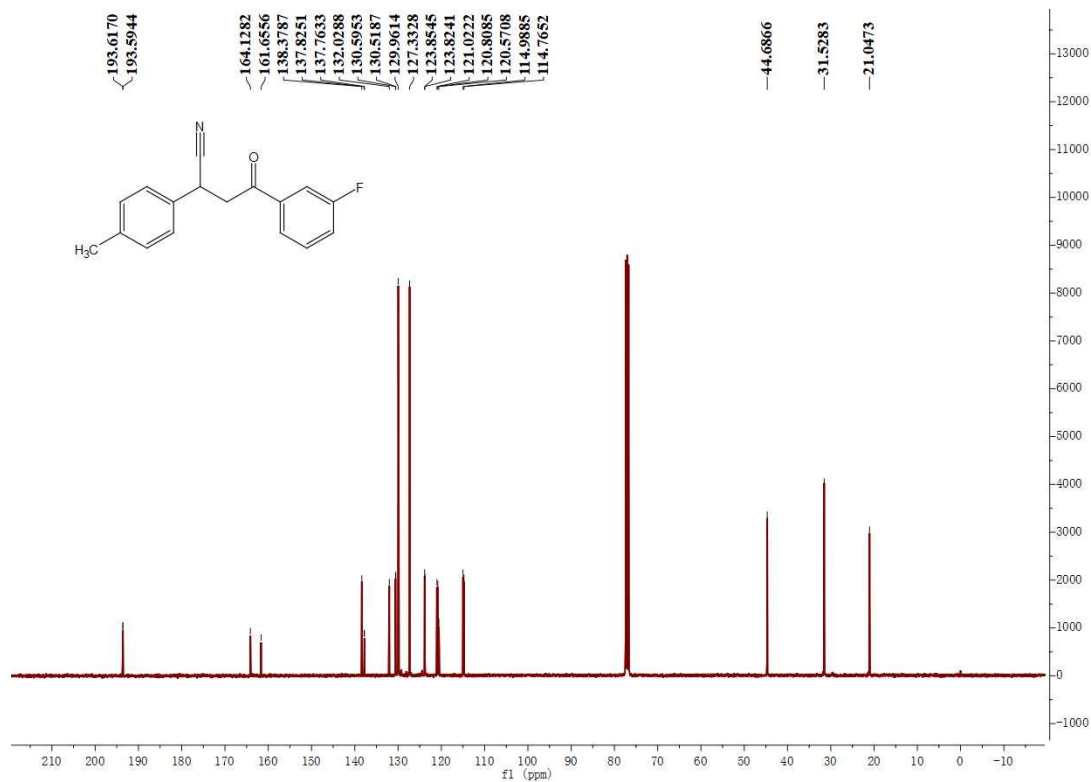

<sup>19</sup>F-NMR Spectrum (376 MHz, CDCl<sub>3</sub>) of **25d**

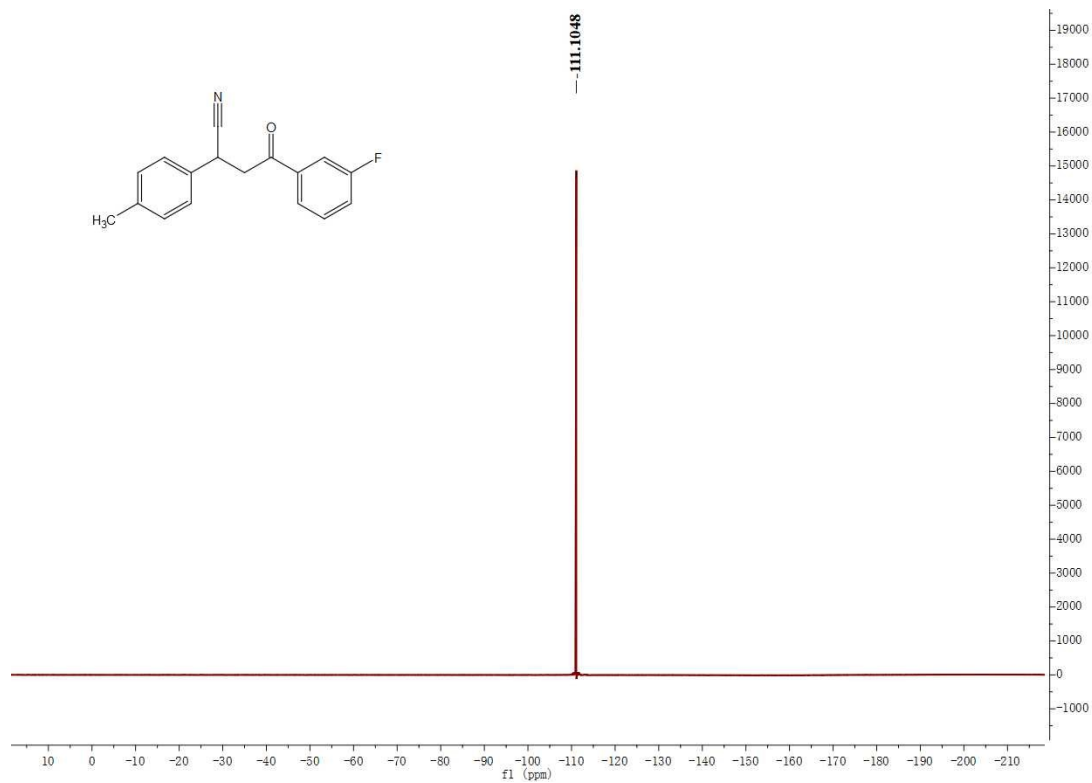

$^1\text{H-NMR}$  Spectrum (400 MHz,  $\text{CDCl}_3$ ) of 26d

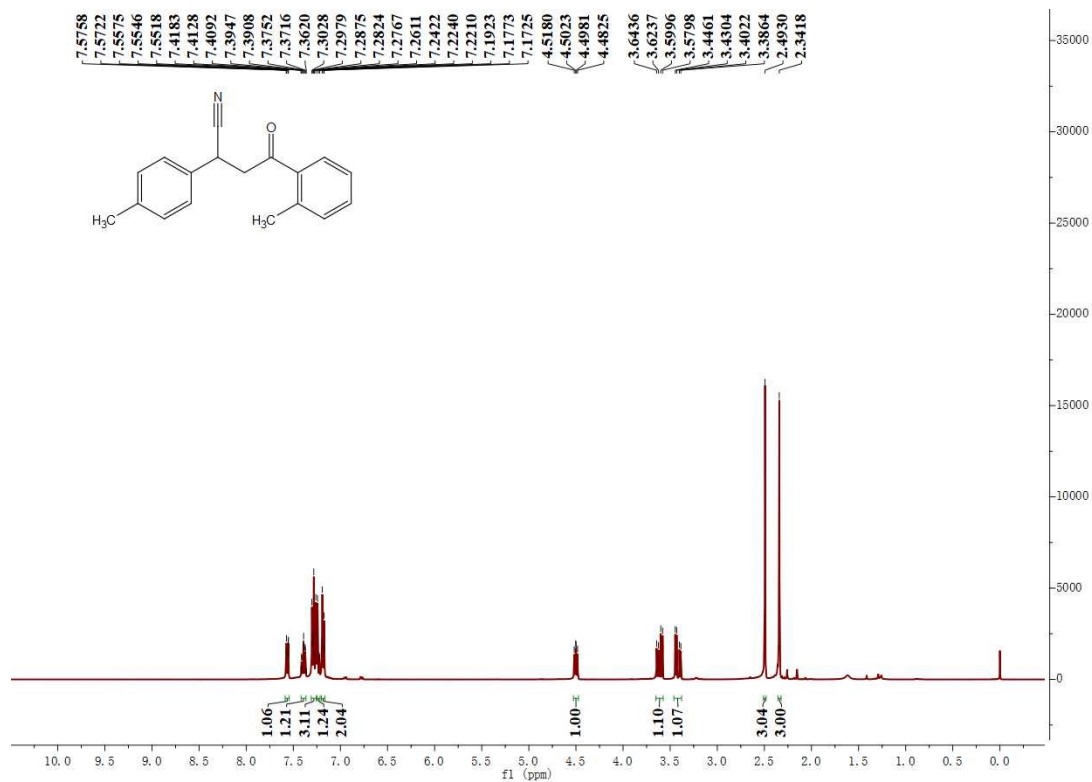

$^{13}\text{C-NMR}$  Spectrum (101 MHz,  $\text{CDCl}_3$ ) of 26d

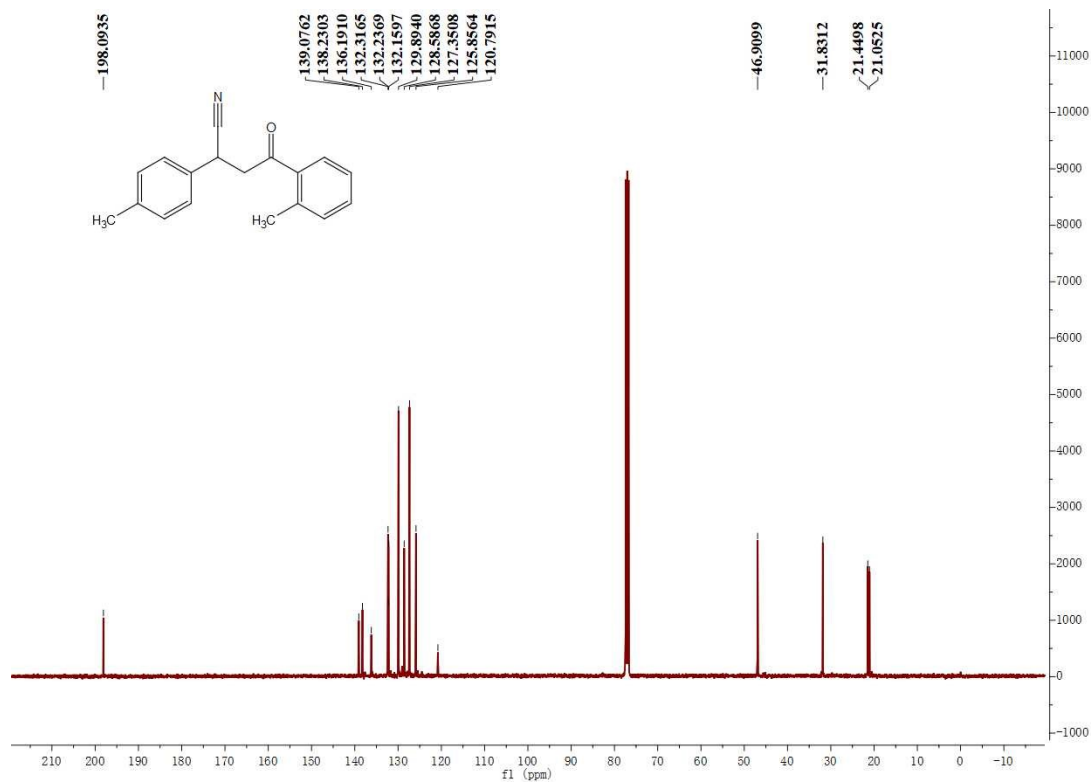

**<sup>1</sup>H-NMR Spectrum (600 MHz, CDCl<sub>3</sub>) of 27d**

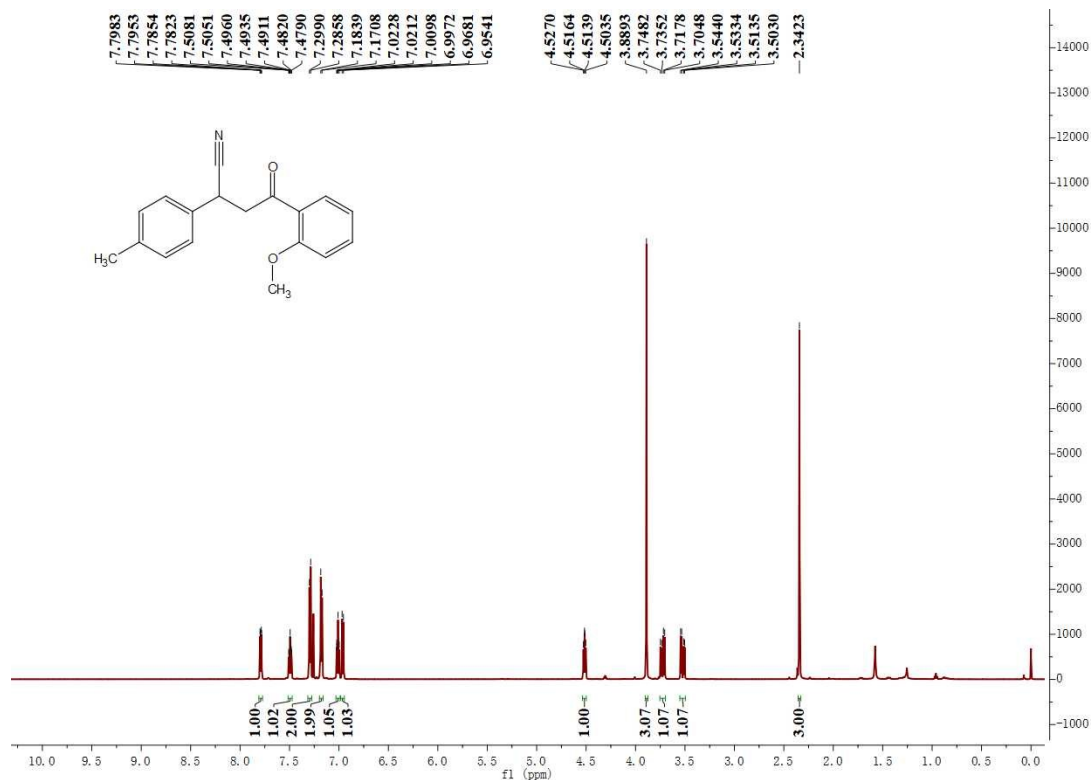

**<sup>13</sup>C-NMR Spectrum (101 MHz, CDCl<sub>3</sub>) of 27d**

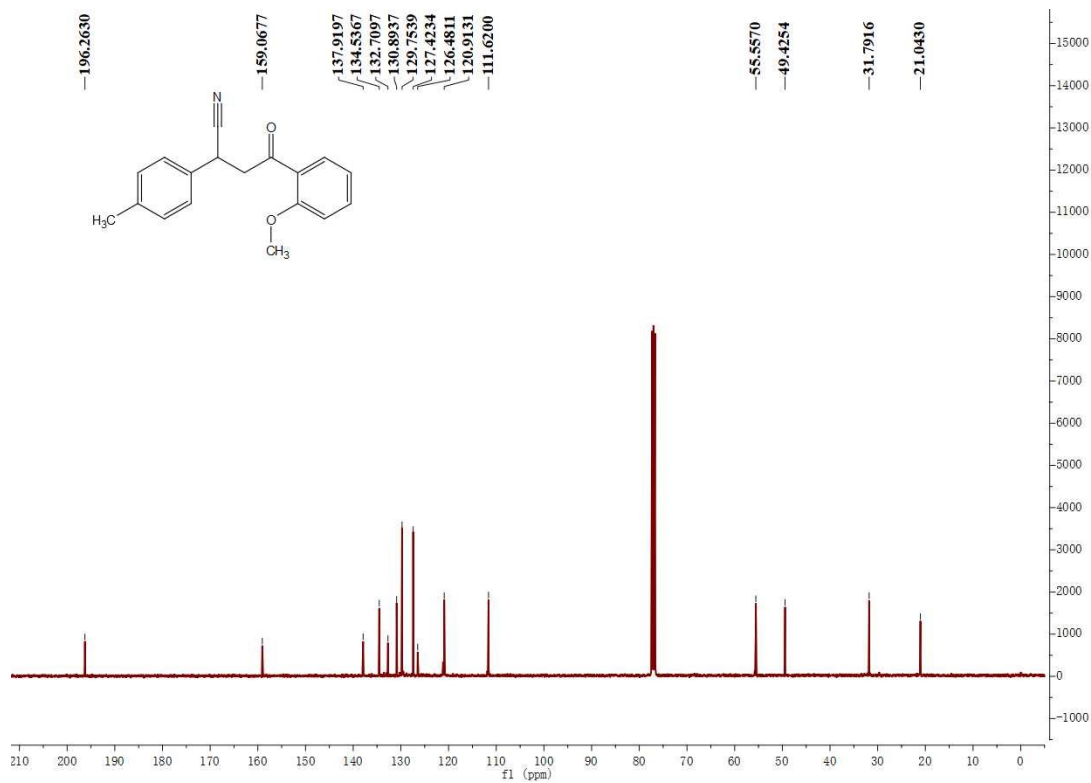

**<sup>1</sup>H-NMR Spectrum (400 MHz, CDCl<sub>3</sub>) of 28d**

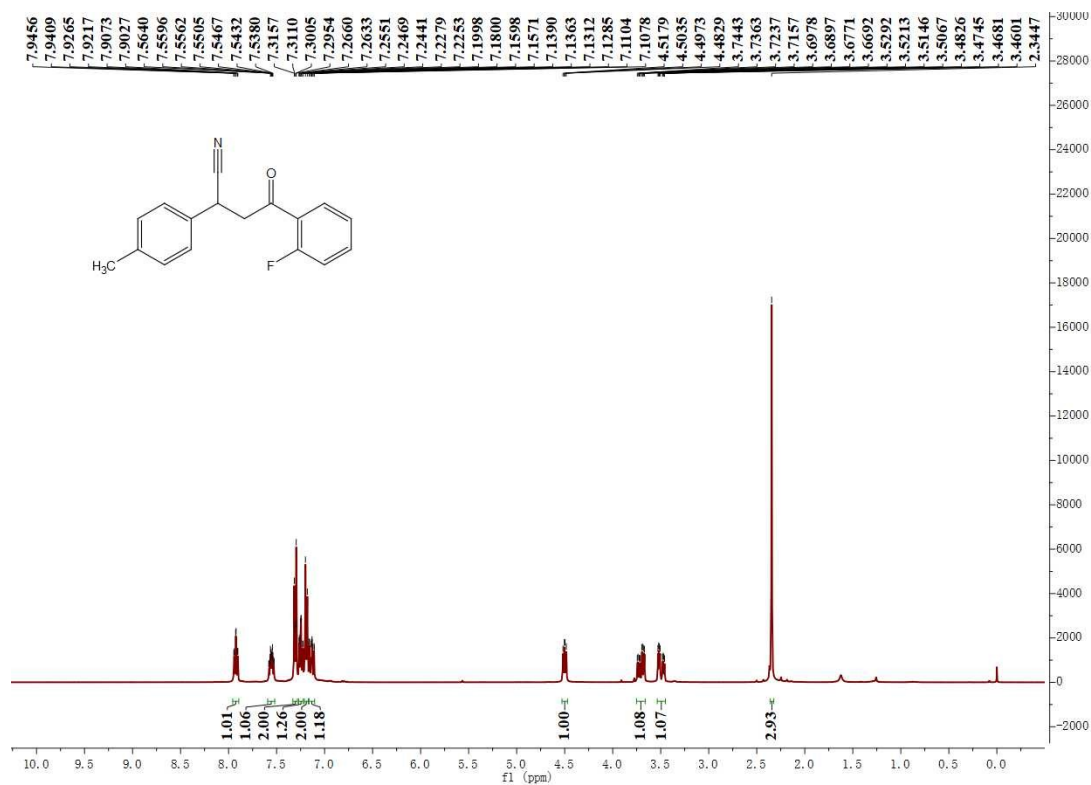

**<sup>13</sup>C-NMR Spectrum (101 MHz, CDCl<sub>3</sub>) of 28d**

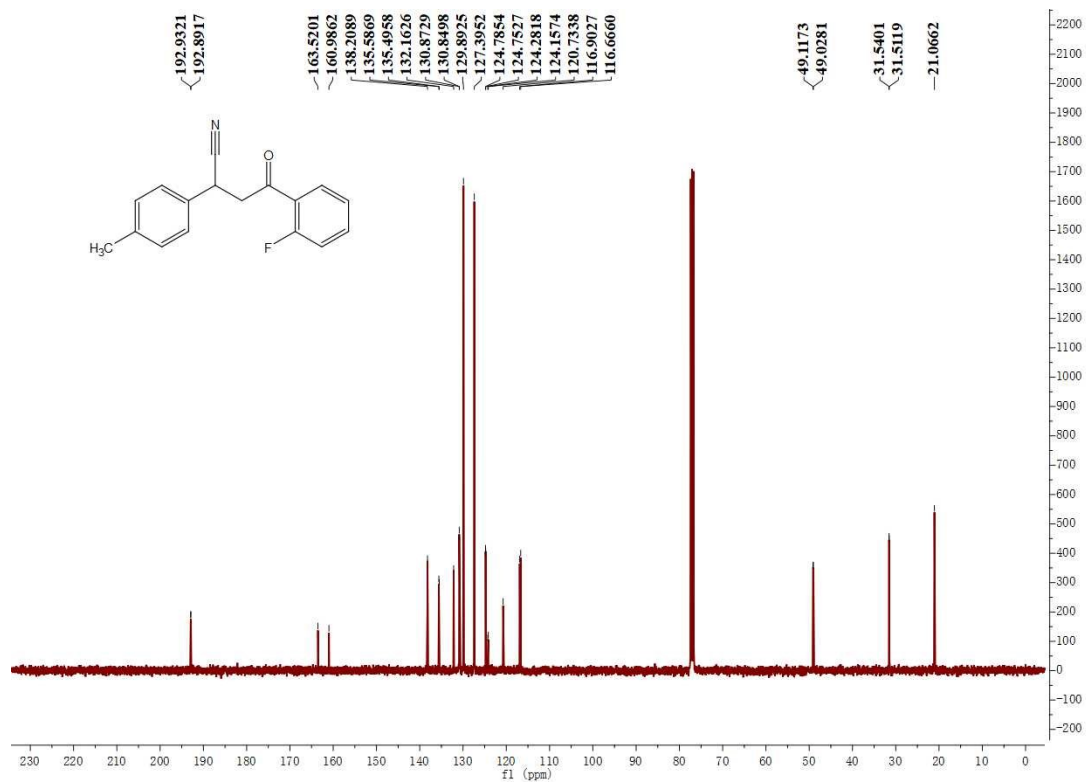

<sup>19</sup>F-NMR Spectrum (376 MHz, CDCl<sub>3</sub>) of **28d**

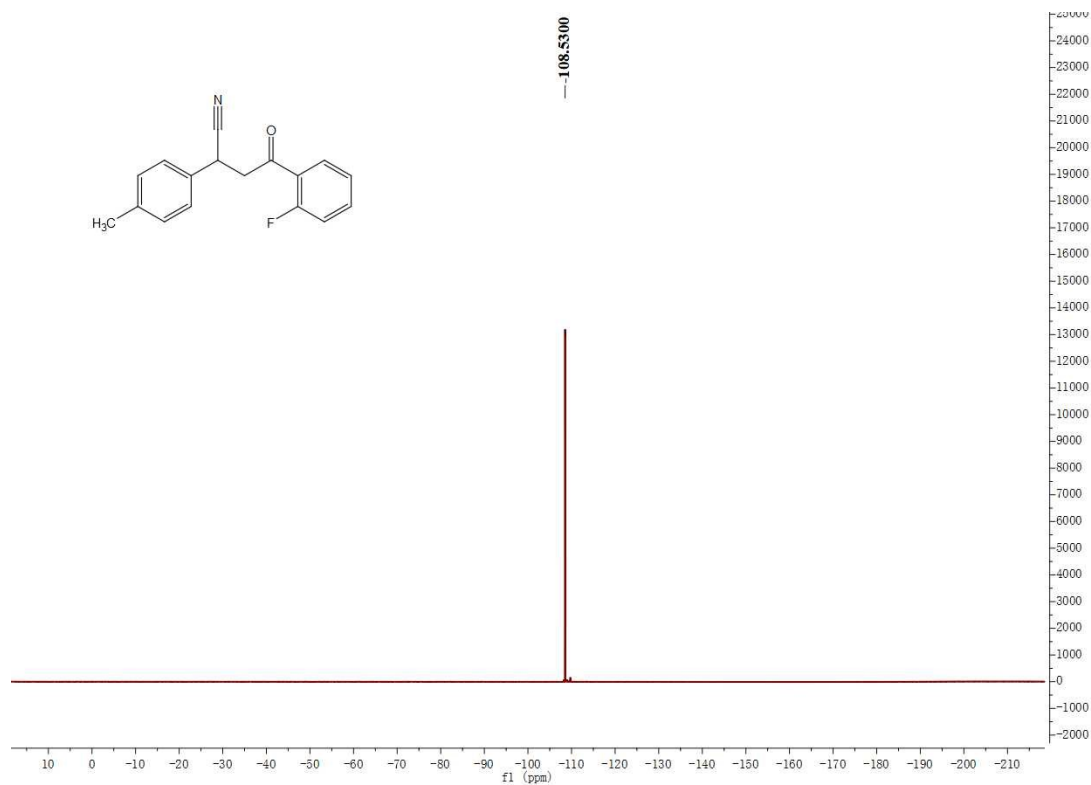

<sup>1</sup>H-NMR Spectrum (400 MHz, CDCl<sub>3</sub>) of **29d**

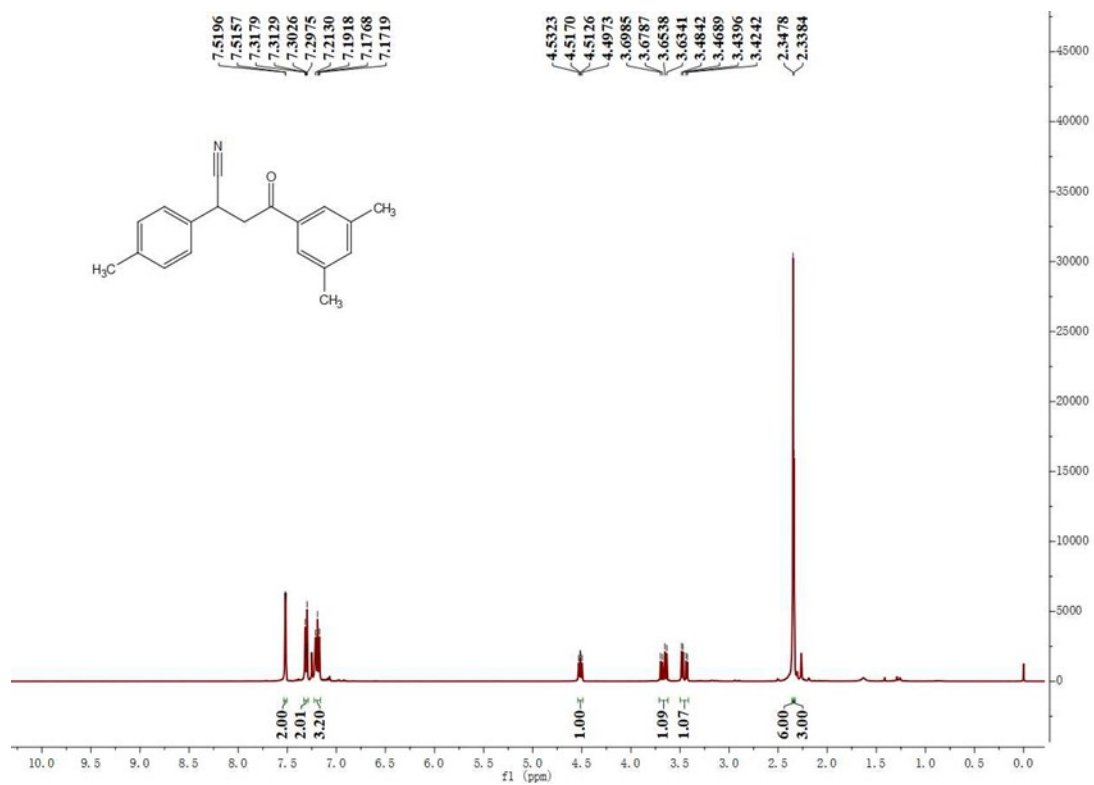

**<sup>13</sup>C-NMR Spectrum (101 MHz, CDCl<sub>3</sub>) of 29d**

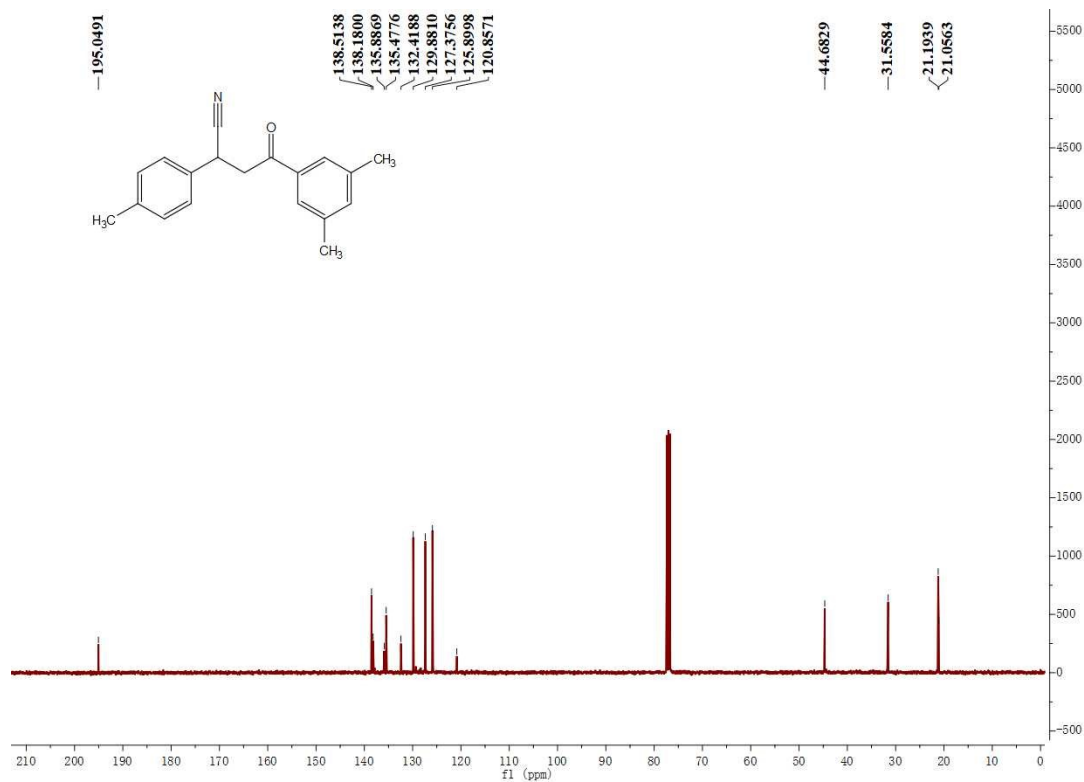

**<sup>1</sup>H-NMR Spectrum (400 MHz, CDCl<sub>3</sub>) of 30d**

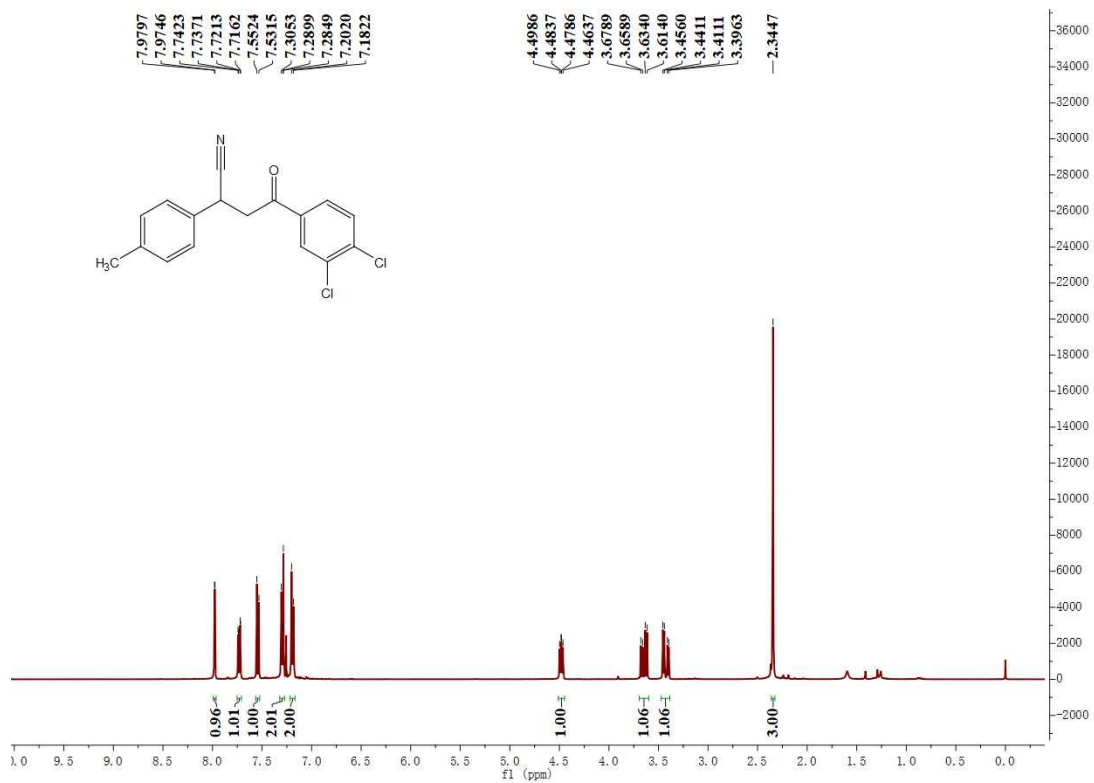

**<sup>13</sup>C-NMR Spectrum (101 MHz, CDCl<sub>3</sub>) of 30d**

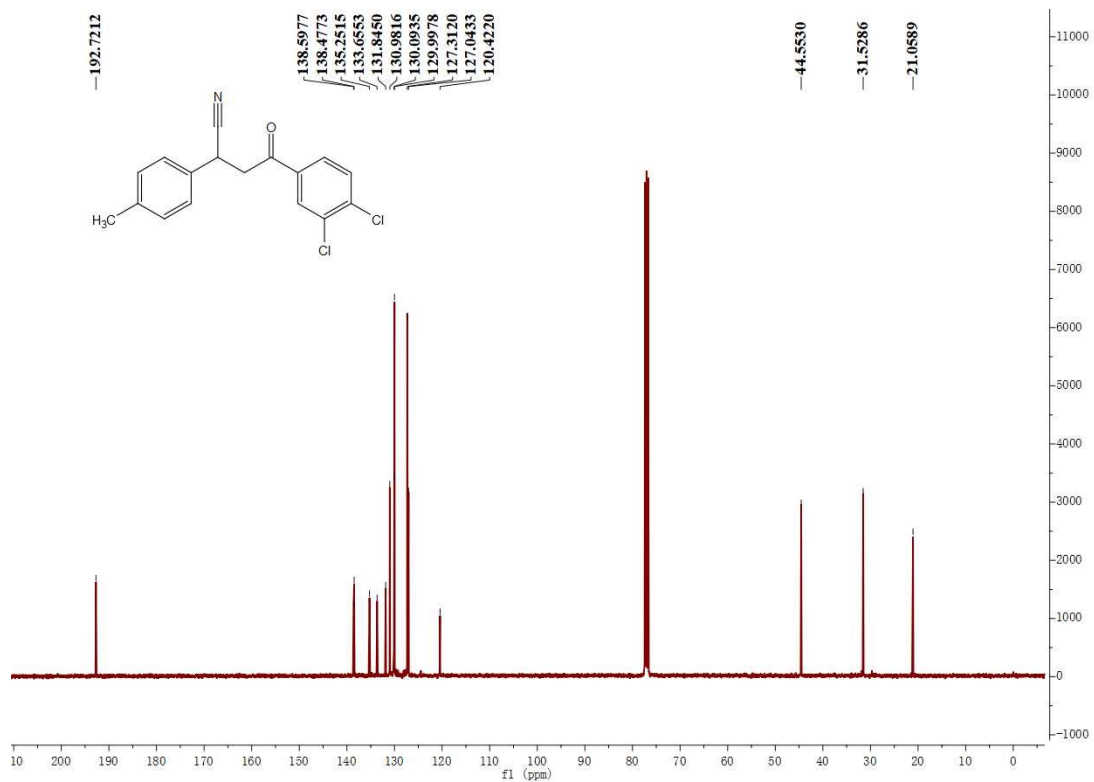

**<sup>1</sup>H-NMR Spectrum (400 MHz, CDCl<sub>3</sub>) of 31d**



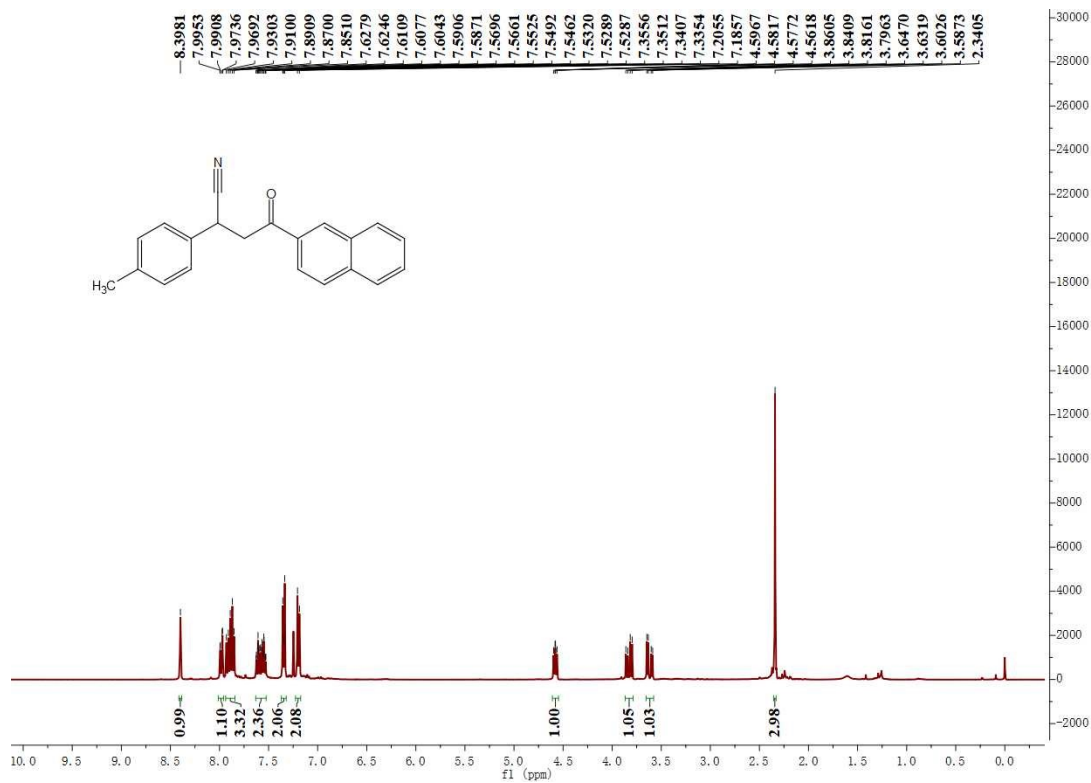

**<sup>13</sup>C-NMR Spectrum (101 MHz, CDCl<sub>3</sub>) of 31d**

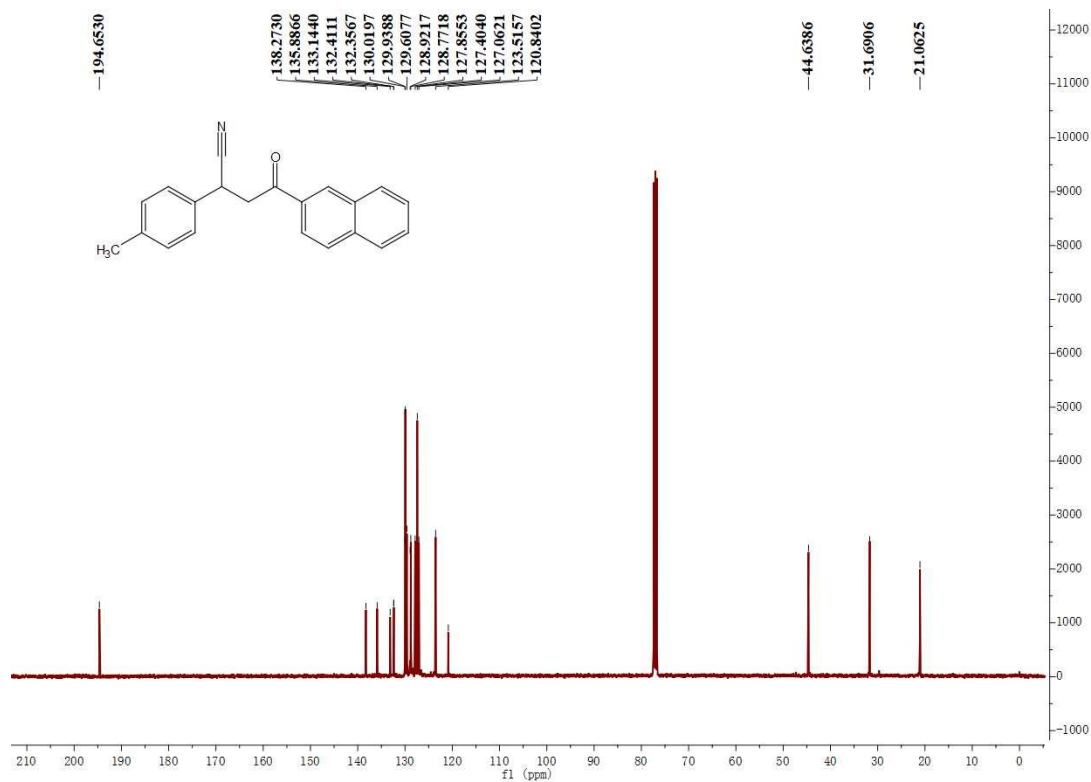

**<sup>1</sup>H-NMR Spectrum (400 MHz, CDCl<sub>3</sub>) of 32d**

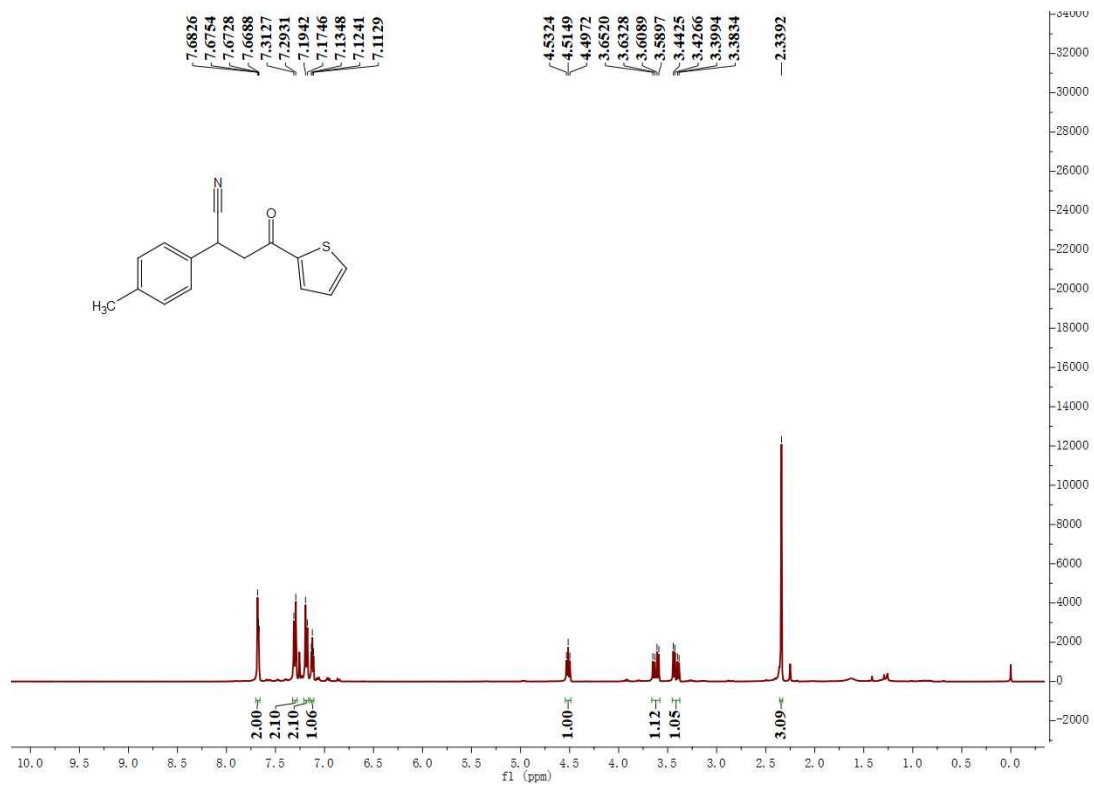

<sup>13</sup>C-NMR Spectrum (101 MHz, CDCl<sub>3</sub>) of **32d**

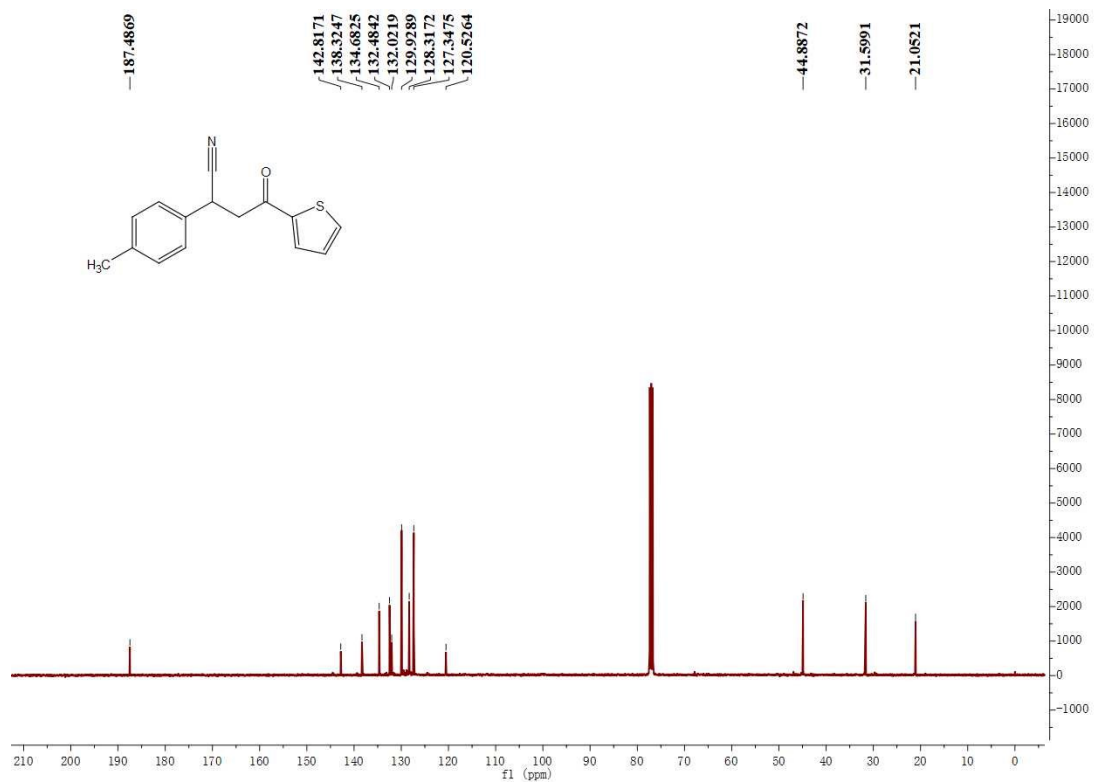

<sup>1</sup>H-NMR Spectrum (600 MHz, CDCl<sub>3</sub>) of **33d**

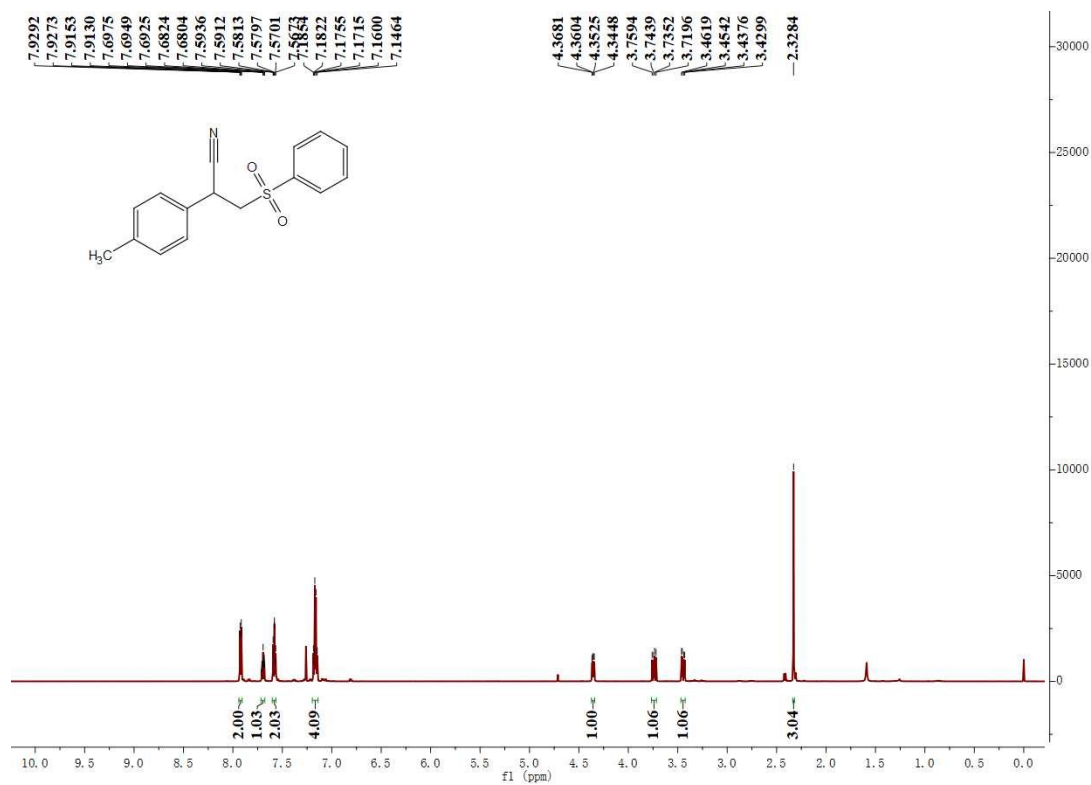

**<sup>13</sup>C-NMR Spectrum (151 MHz, CDCl<sub>3</sub>) of 33d**

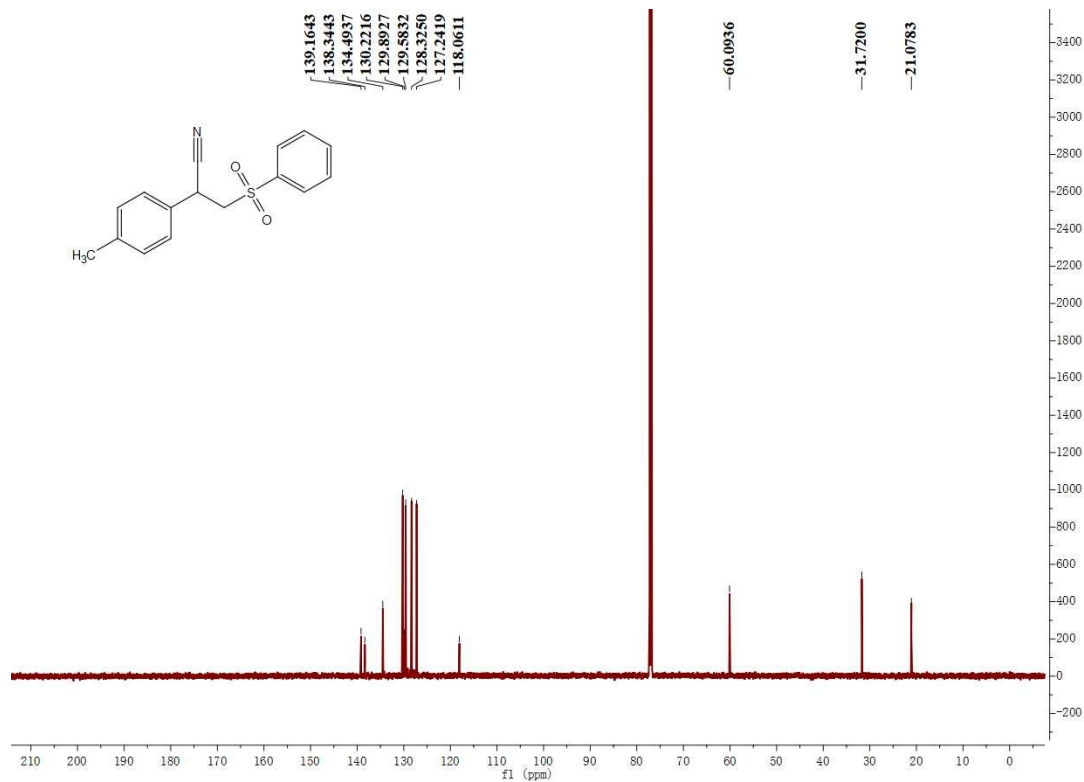

**<sup>1</sup>H-NMR Spectrum (400 MHz, CDCl<sub>3</sub>) of 34d**

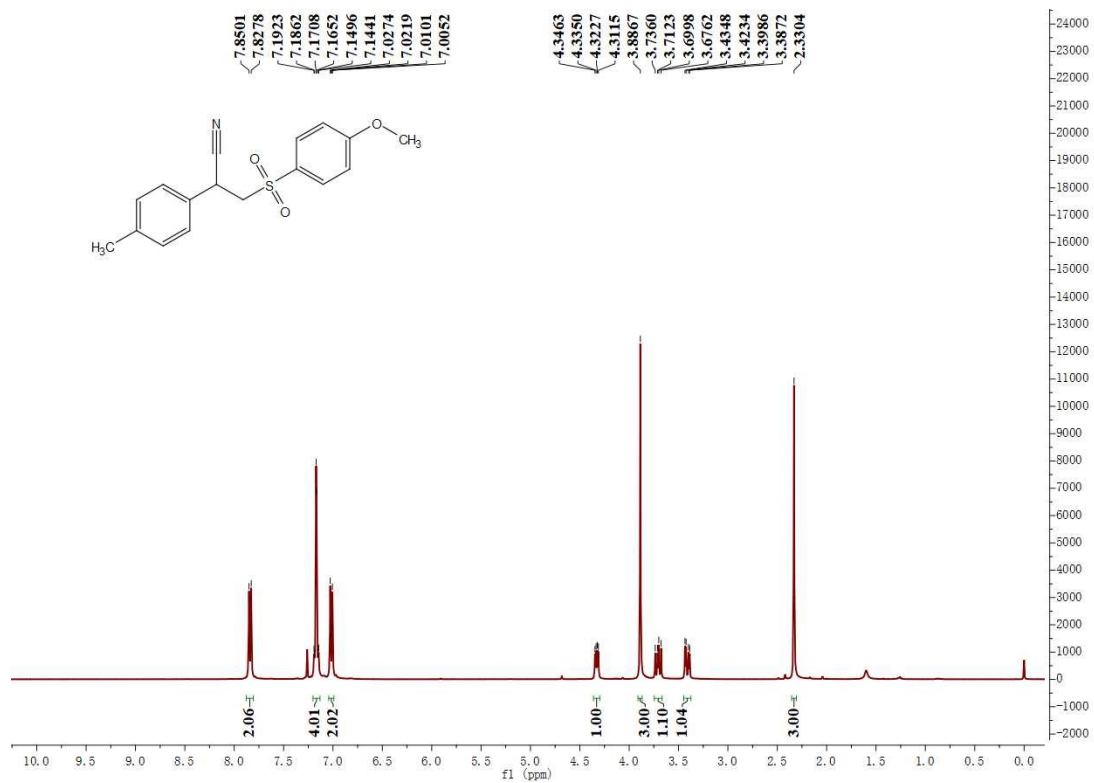

**<sup>13</sup>C-NMR Spectrum (101 MHz, CDCl<sub>3</sub>) of 34d**

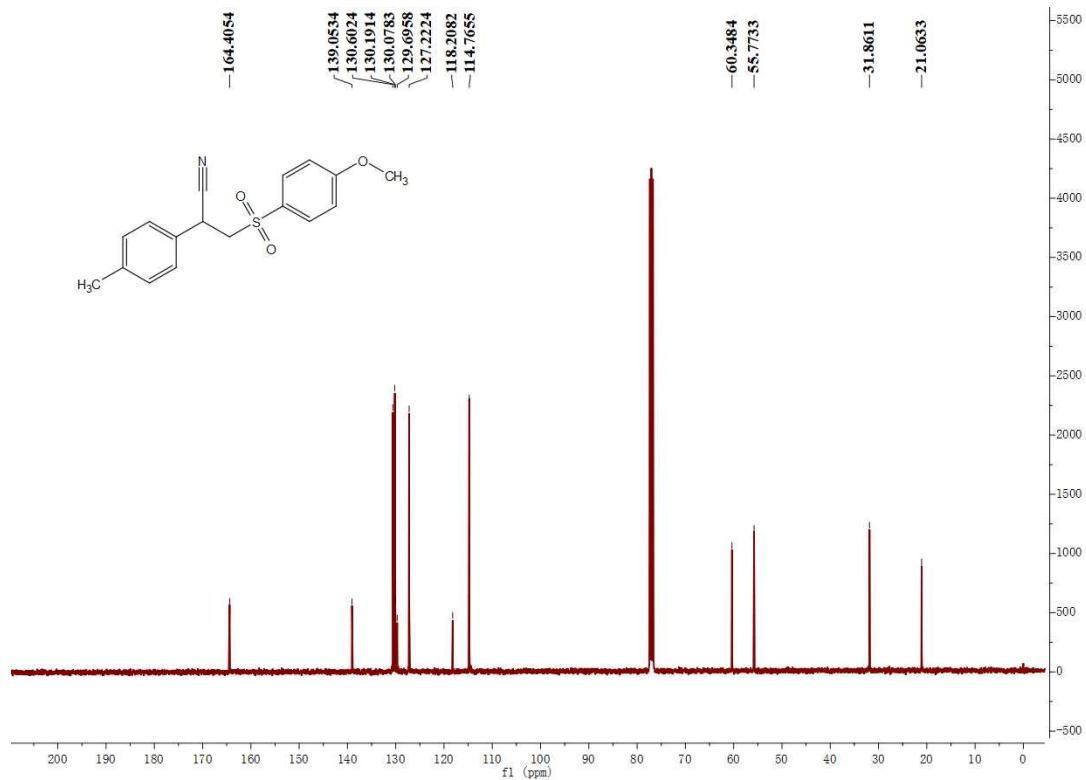

**<sup>1</sup>H-NMR Spectrum (600 MHz, CDCl<sub>3</sub>) of 35d**

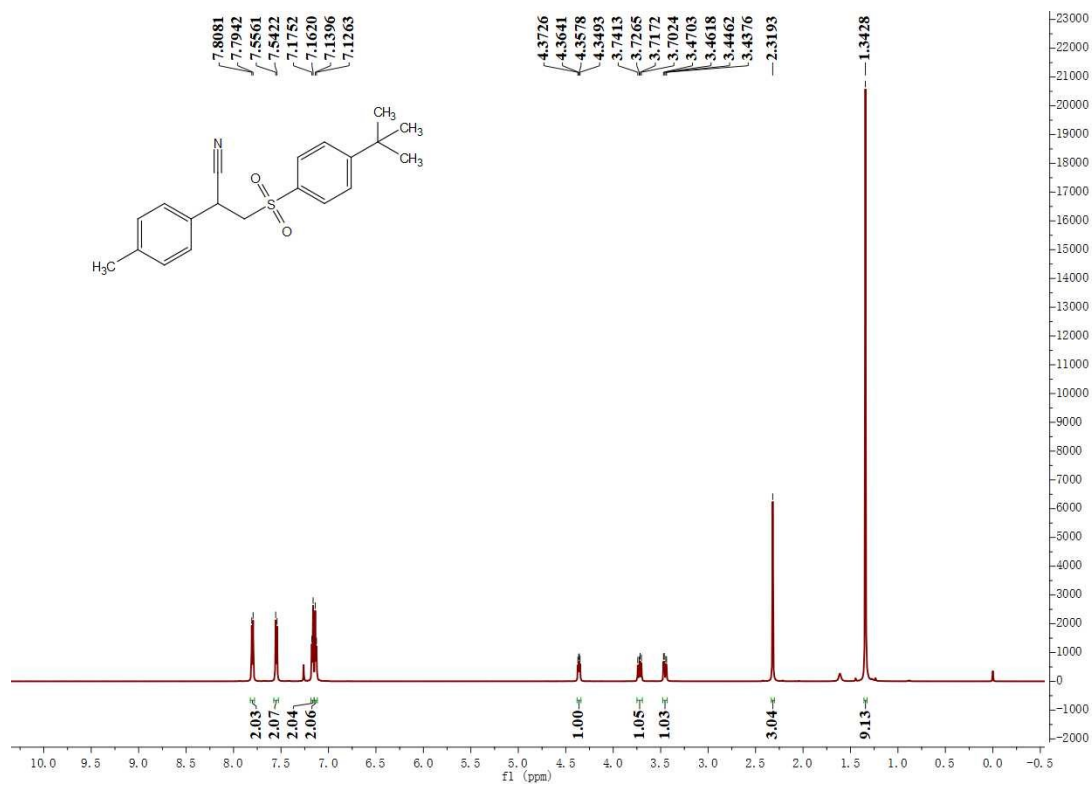

**<sup>13</sup>C-NMR Spectrum (151 MHz, CDCl<sub>3</sub>) of 35d**

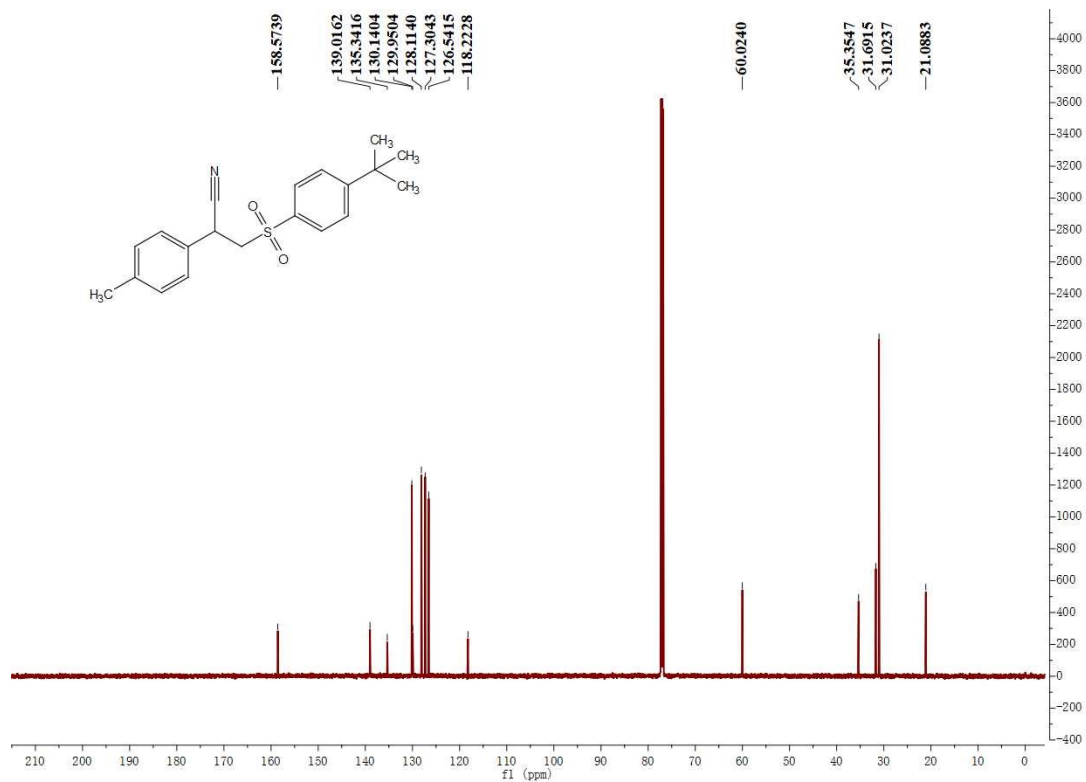

**<sup>1</sup>H-NMR Spectrum (400 MHz, CDCl<sub>3</sub>) of 36d**

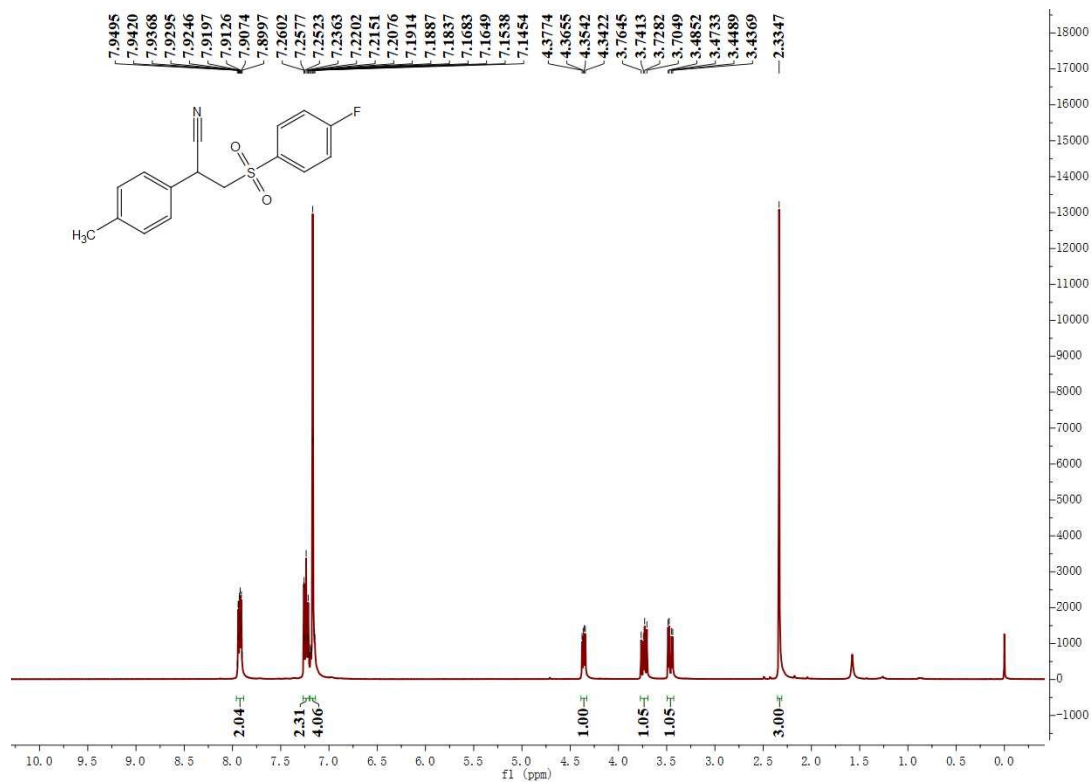

<sup>13</sup>C-NMR Spectrum (101 MHz, CDCl<sub>3</sub>) of 36d

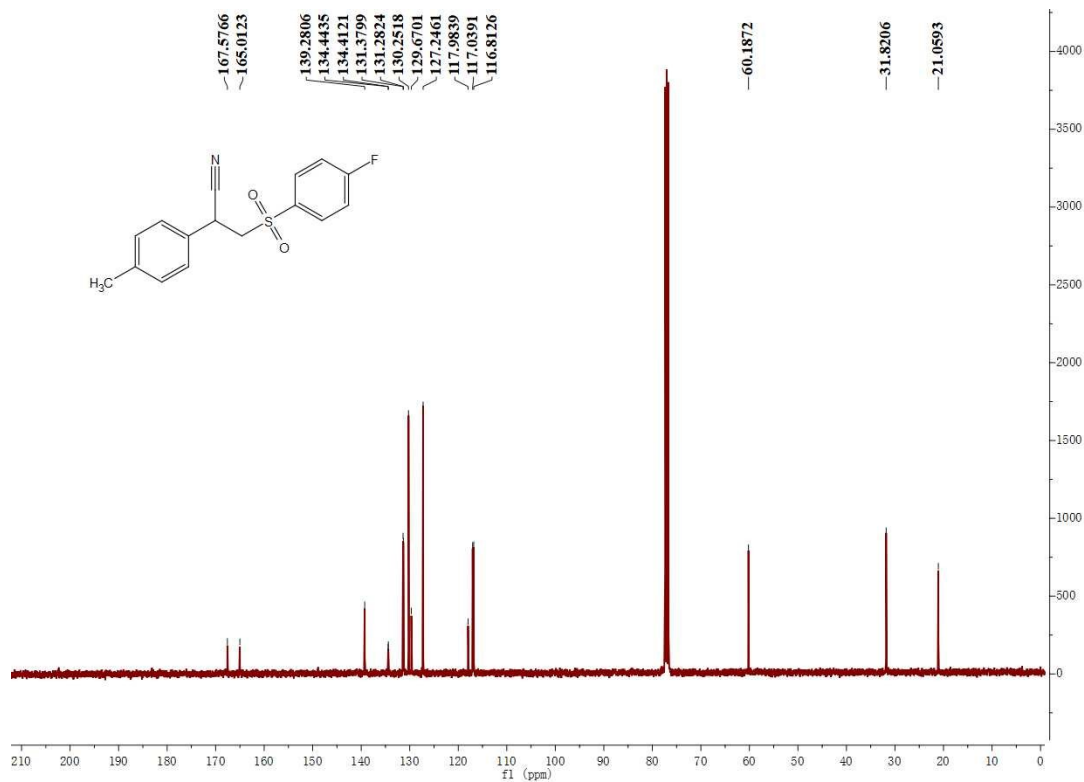

<sup>19</sup>F-NMR Spectrum (376 MHz, CDCl<sub>3</sub>) of 36d

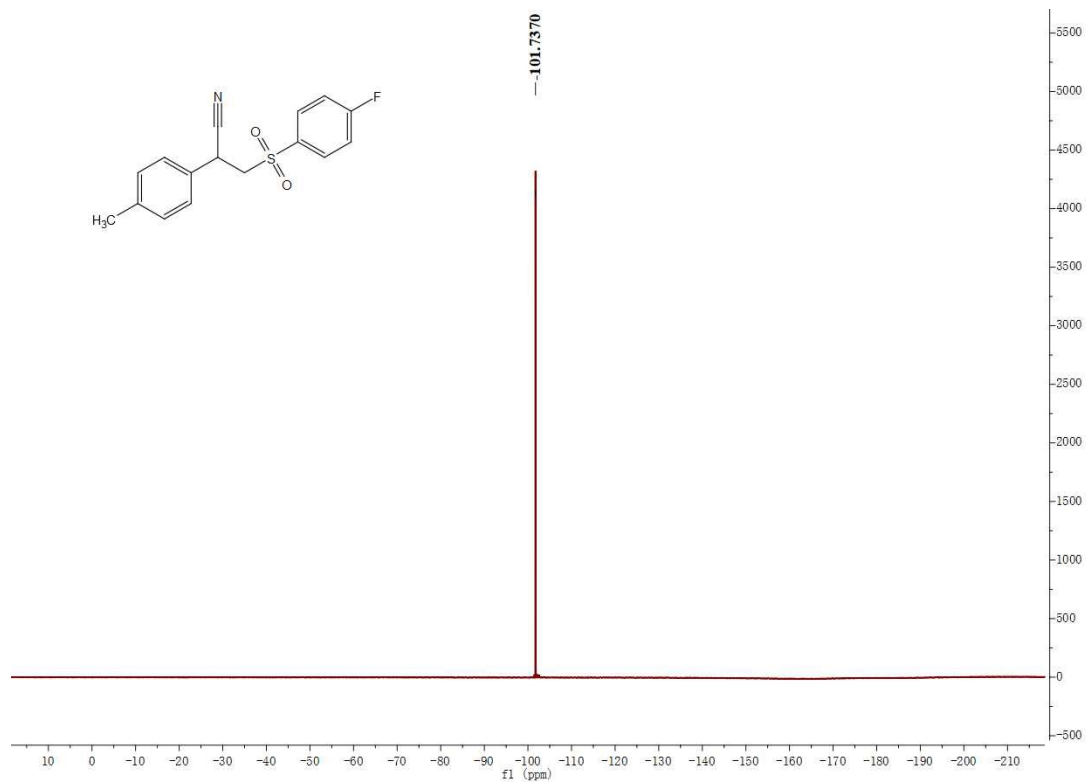

**<sup>1</sup>H-NMR Spectrum (600 MHz, CDCl<sub>3</sub>) of 37d**

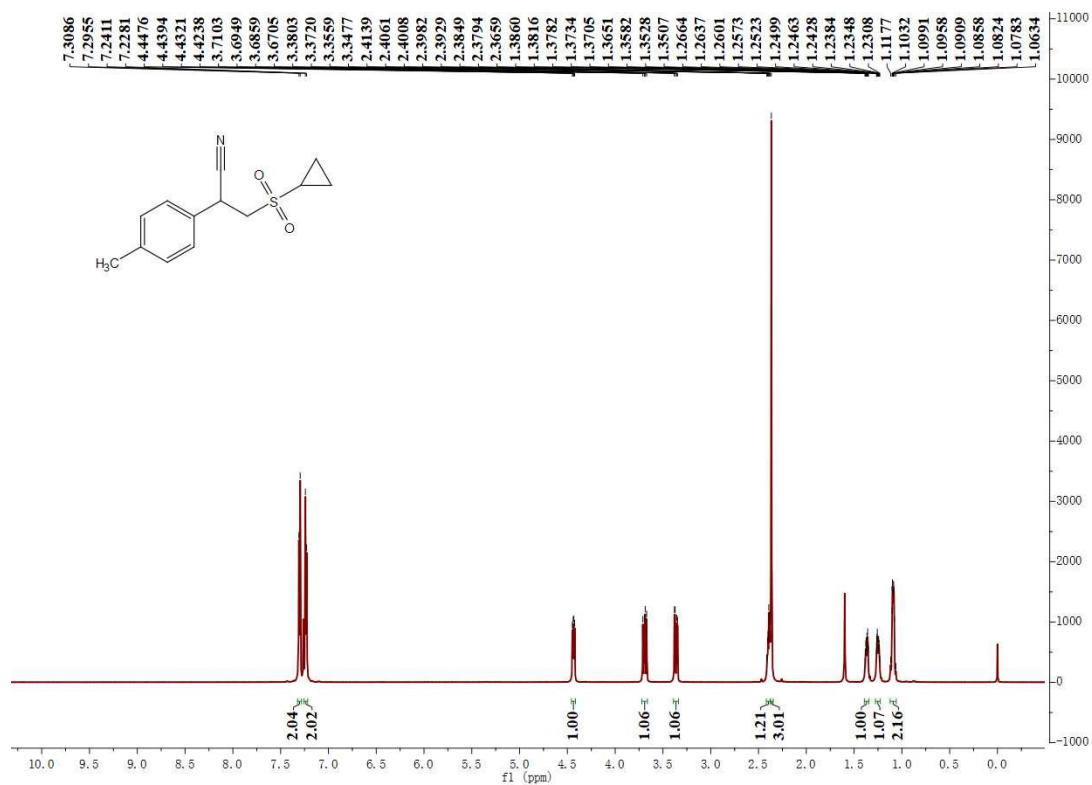

**<sup>13</sup>C-NMR Spectrum (151 MHz, CDCl<sub>3</sub>) of 37d**

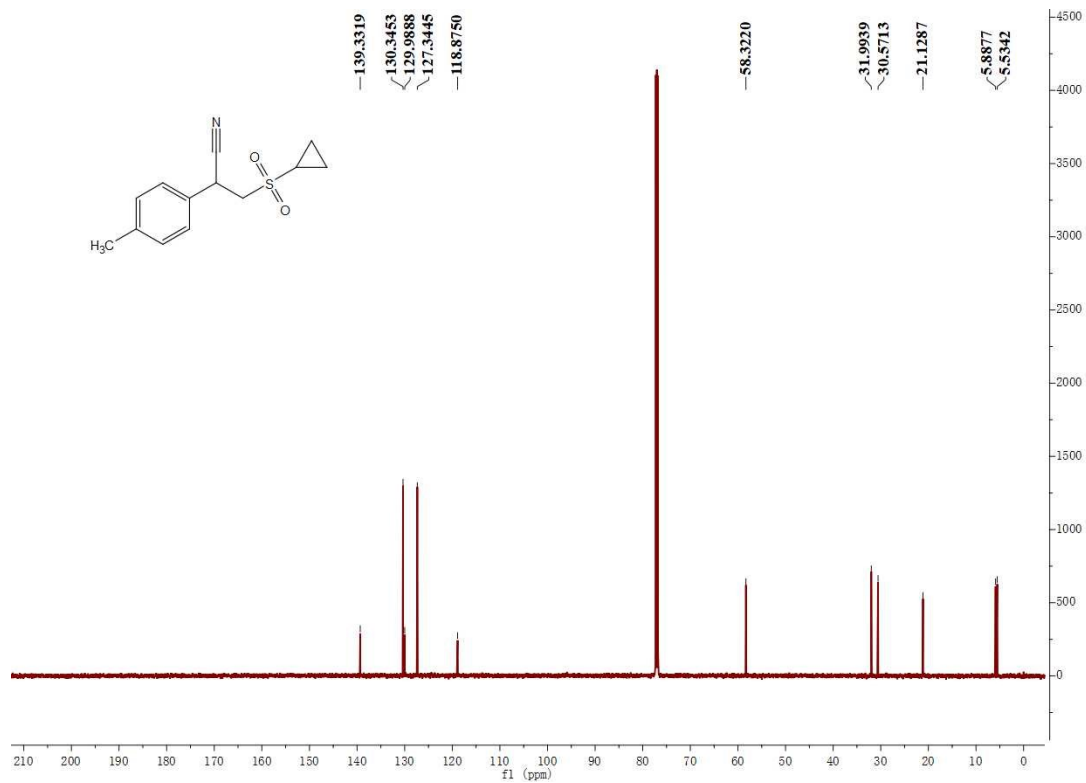

**<sup>1</sup>H-NMR Spectrum (600 MHz, CDCl<sub>3</sub>) of 38d**

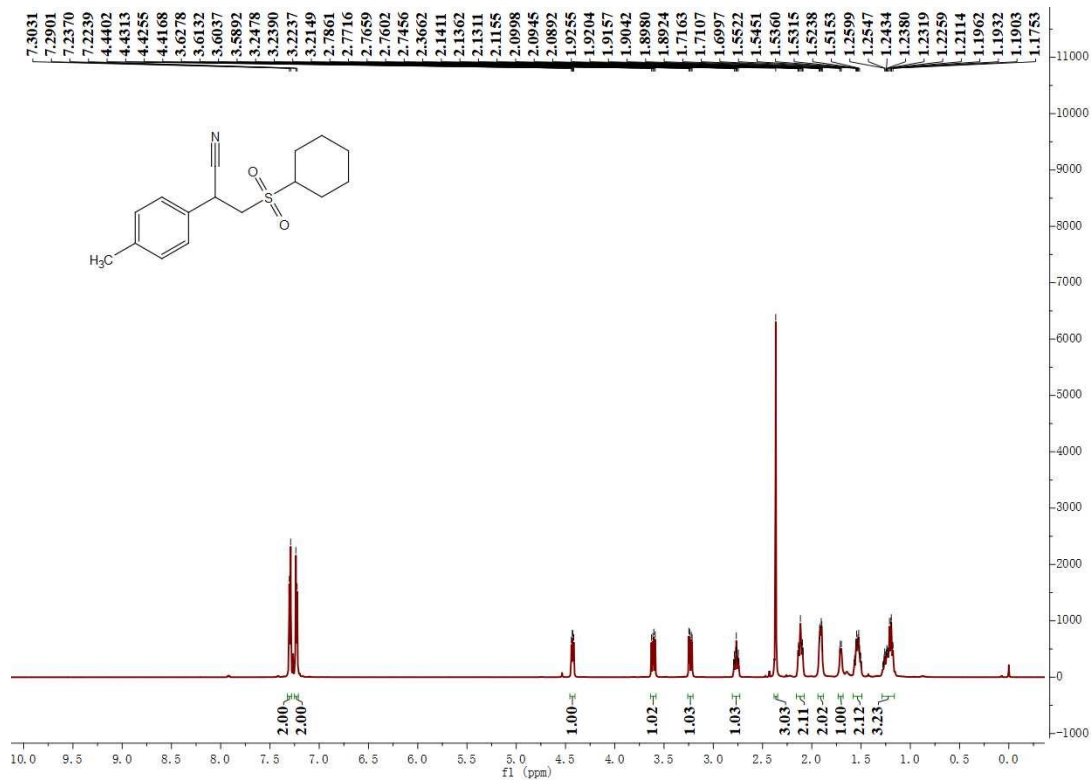

**<sup>13</sup>C-NMR Spectrum (151 MHz, CDCl<sub>3</sub>) of 38d**



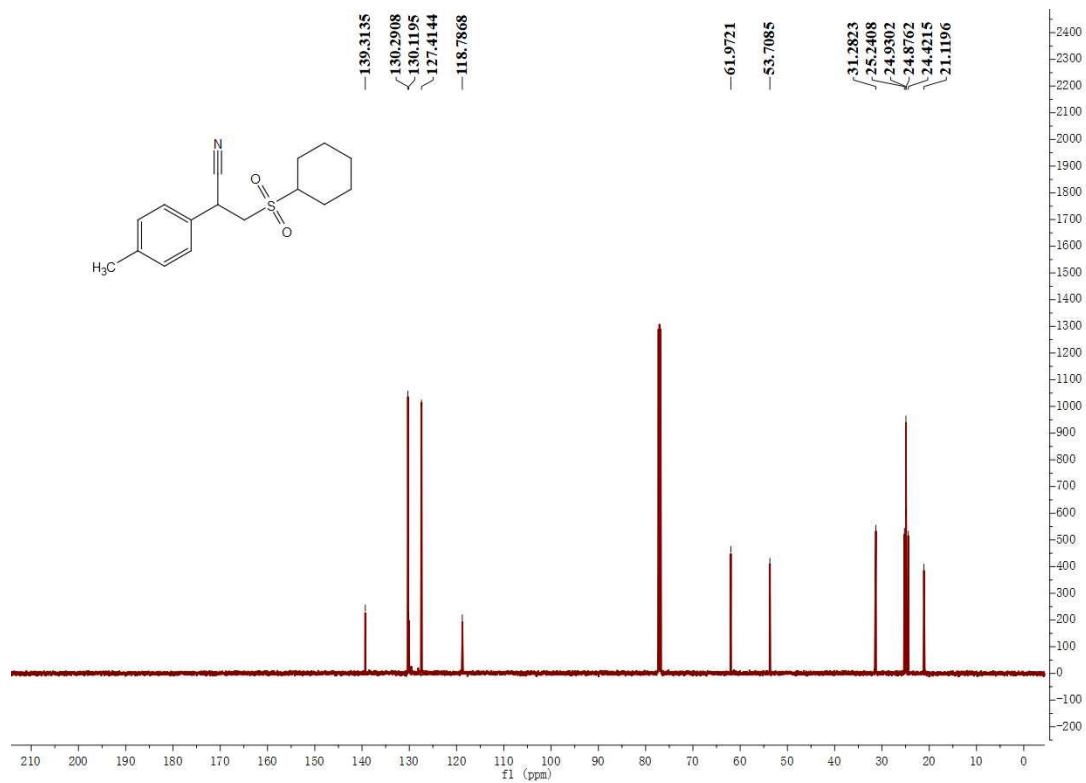

**<sup>1</sup>H-NMR Spectrum (600 MHz, CDCl<sub>3</sub>) of 39d**

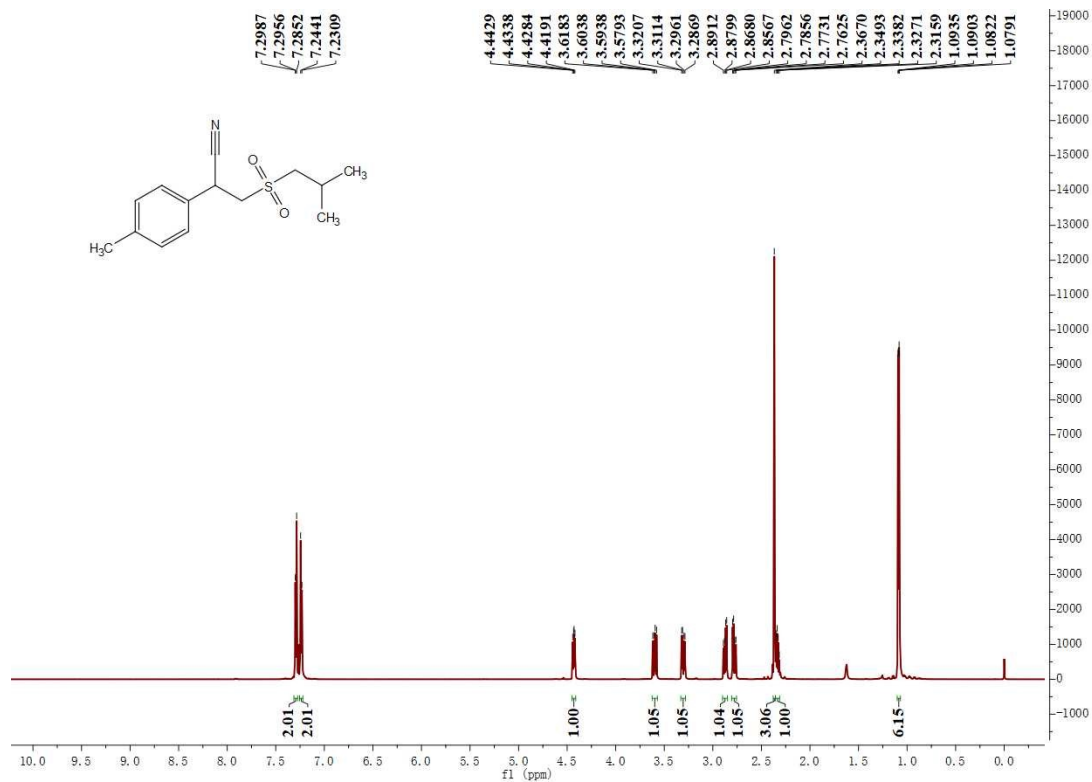

**<sup>13</sup>C-NMR Spectrum (151 MHz, CDCl<sub>3</sub>) of 39d**

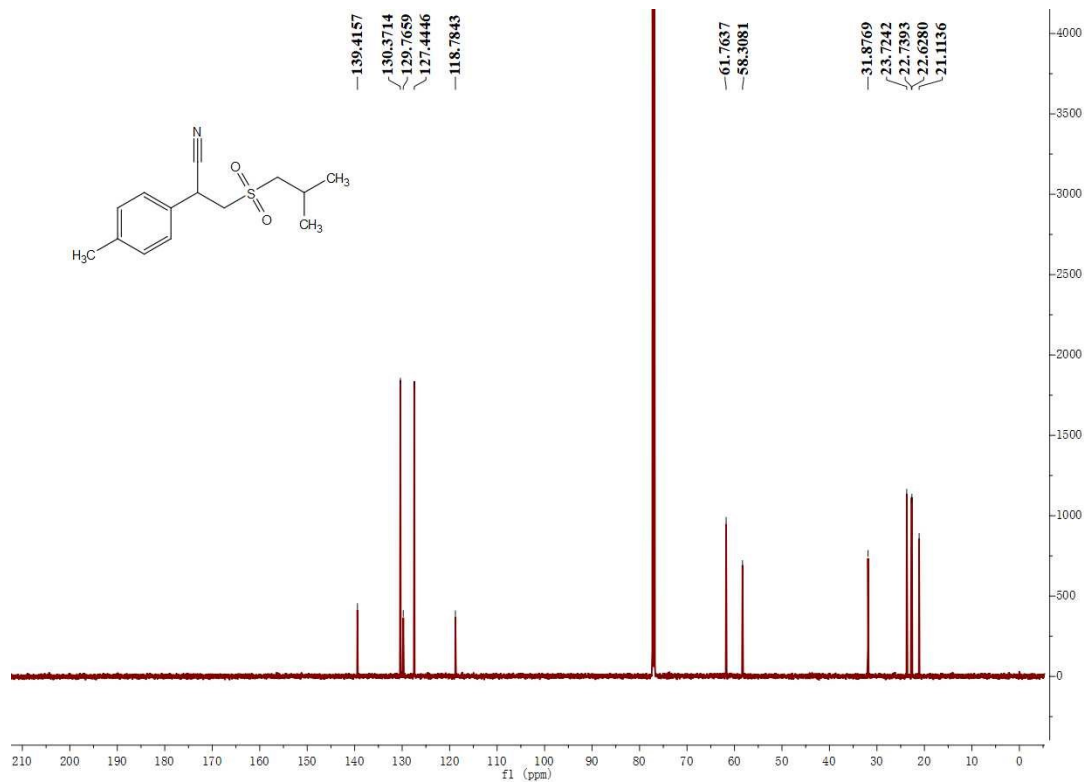

**<sup>1</sup>H-NMR Spectrum (600 MHz, CDCl<sub>3</sub>) of 40d**

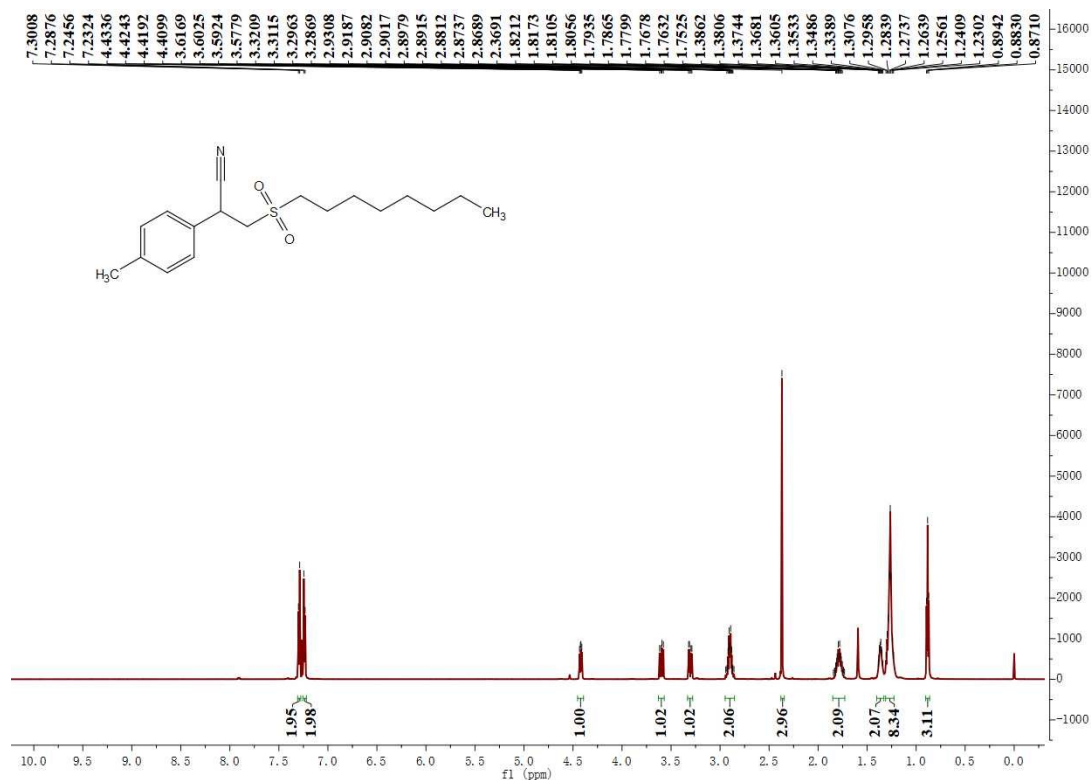

**<sup>13</sup>C-NMR Spectrum (151 MHz, CDCl<sub>3</sub>) of 40d**

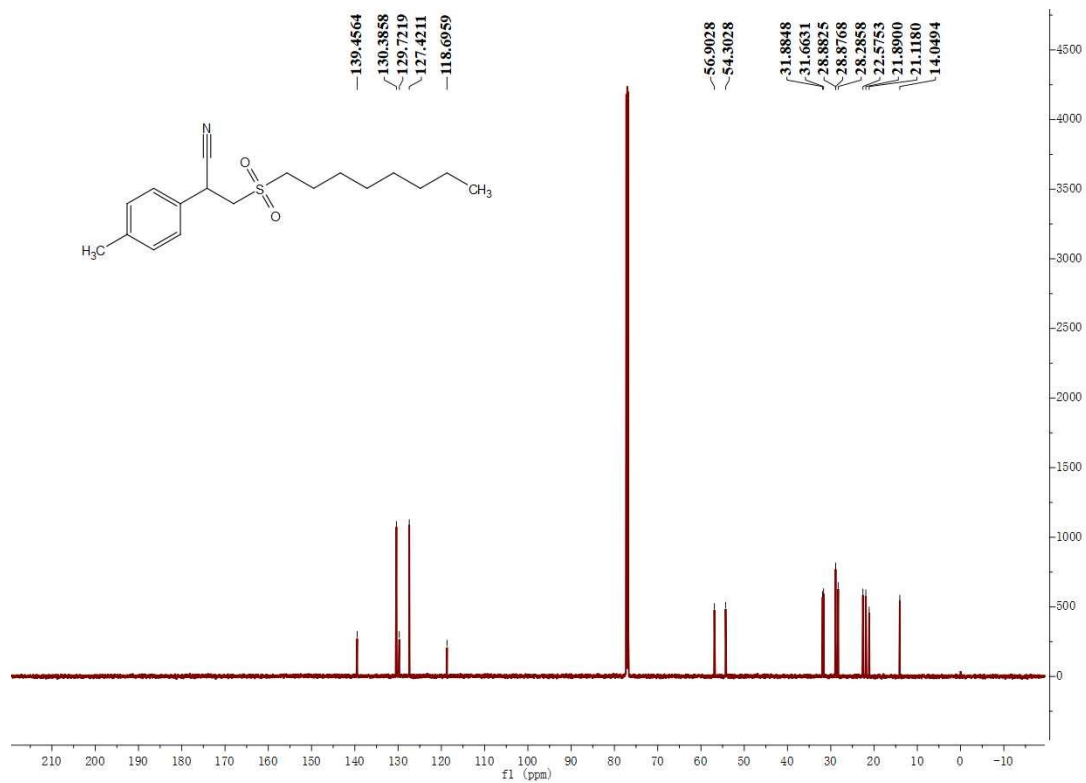

## 9. HRMS of products

### HRMS of 1f

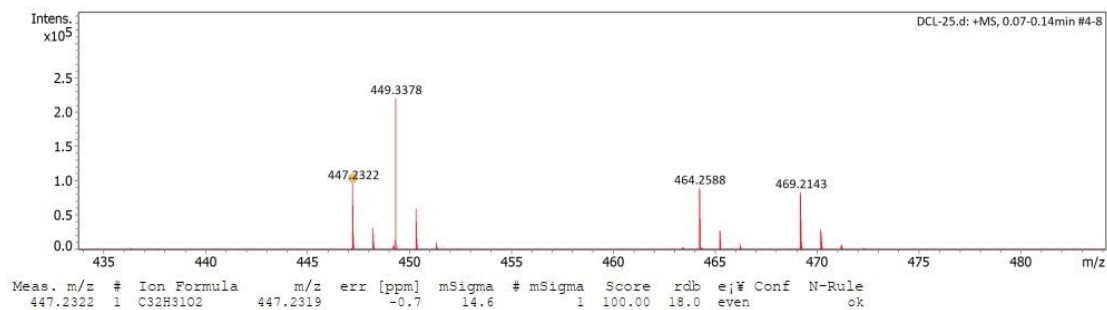

### HRMS of 10d

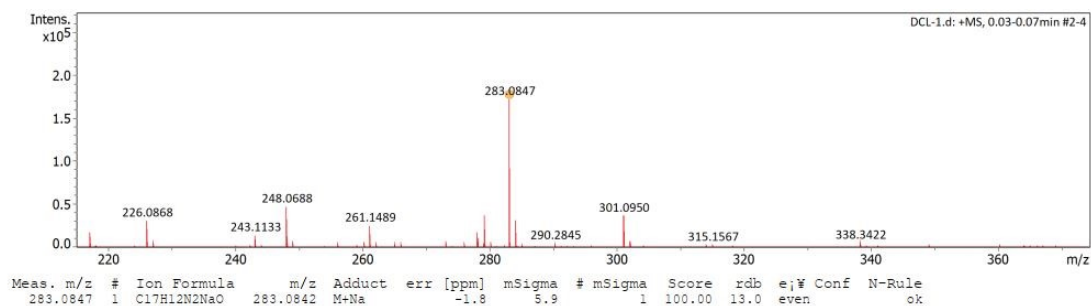

### HRMS of 16d

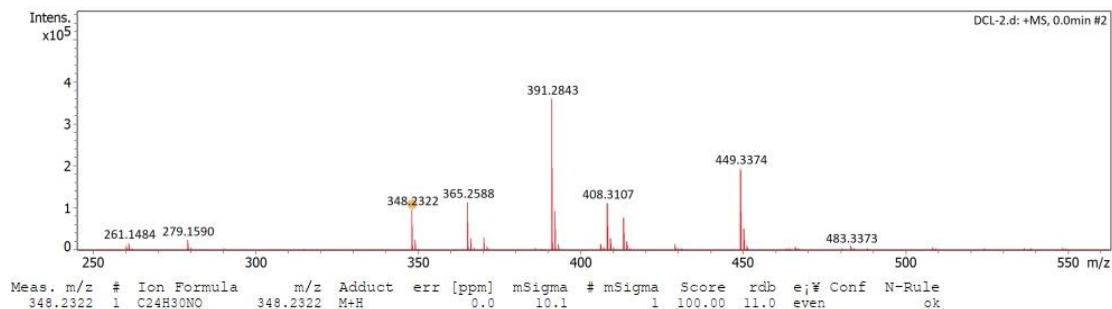

### HRMS of 17d

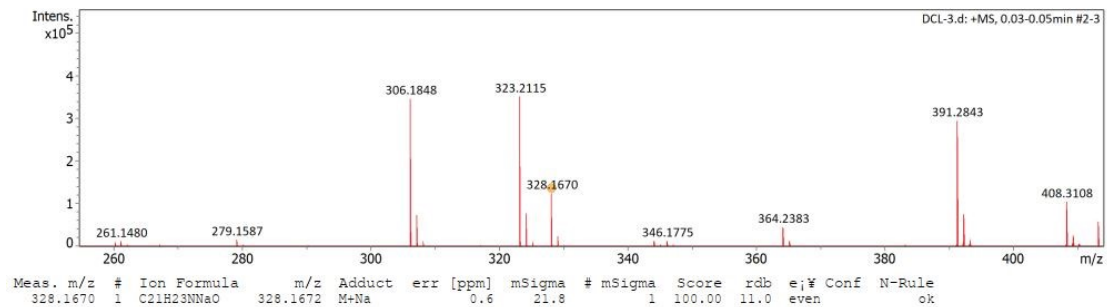

## HRMS of 18d

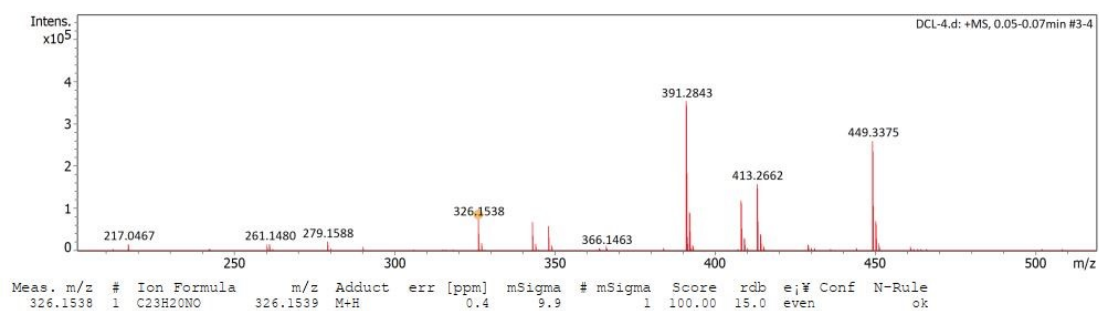

## HRMS of 19d

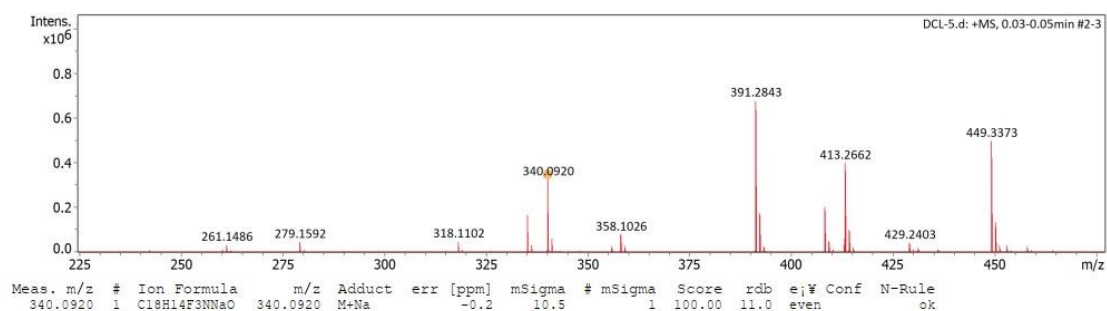

## HRMS of 20d

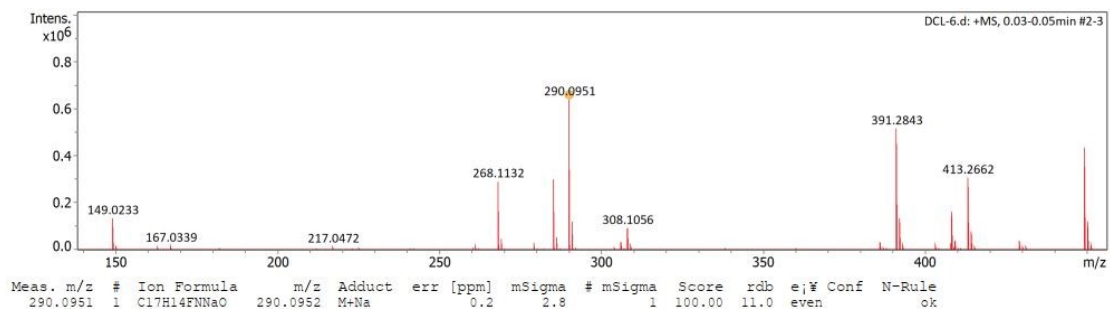

## HRMS of 22d

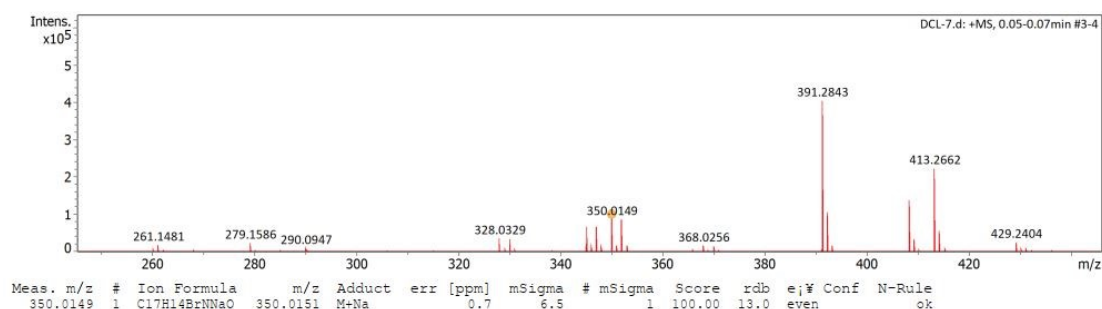

### HRMS of 23d

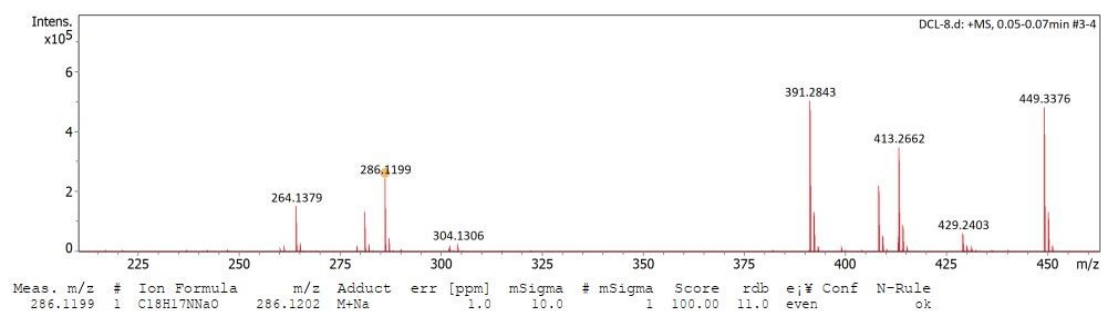

### HRMS of 24d

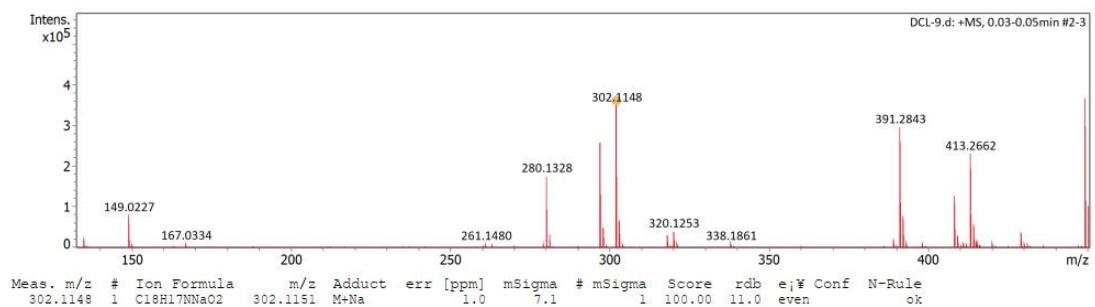

### HRMS of 25d

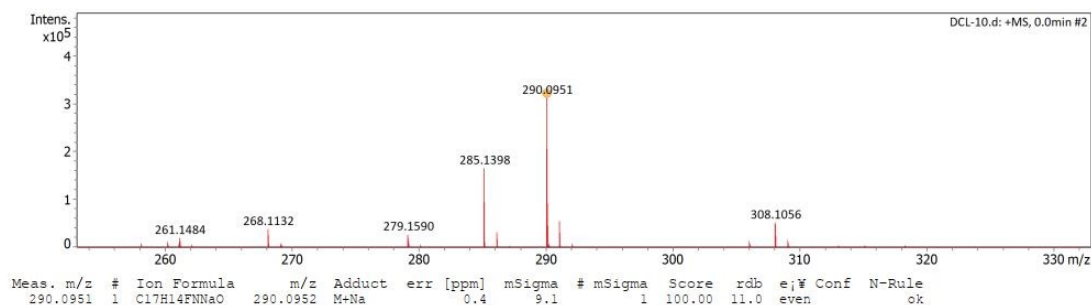

### HRMS of 26d

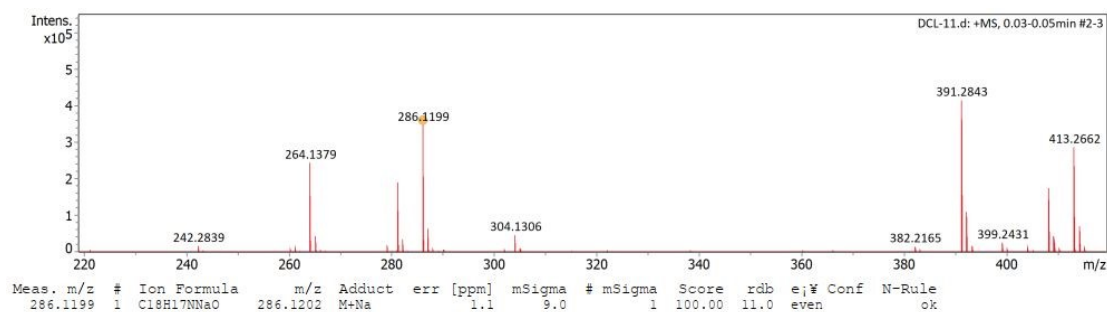

### HRMS of 27d

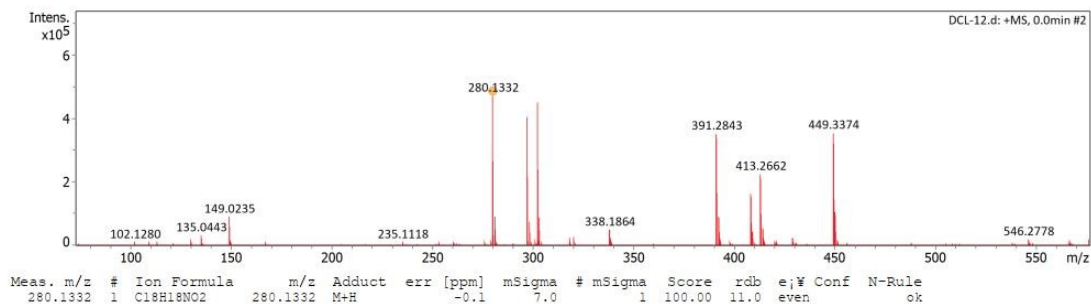

### HRMS of 28d

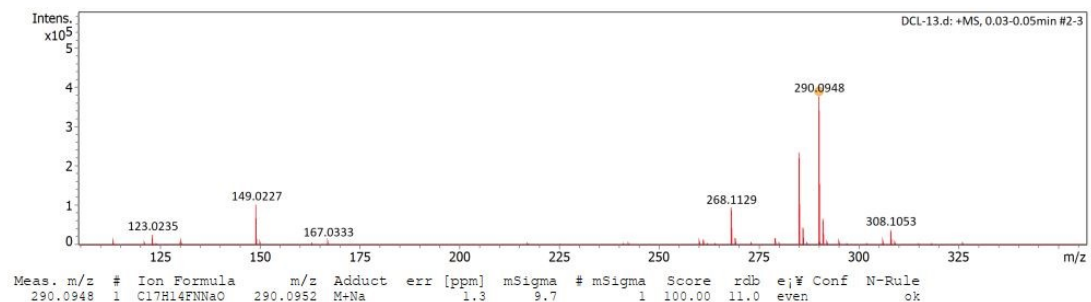

### HRMS of 29d

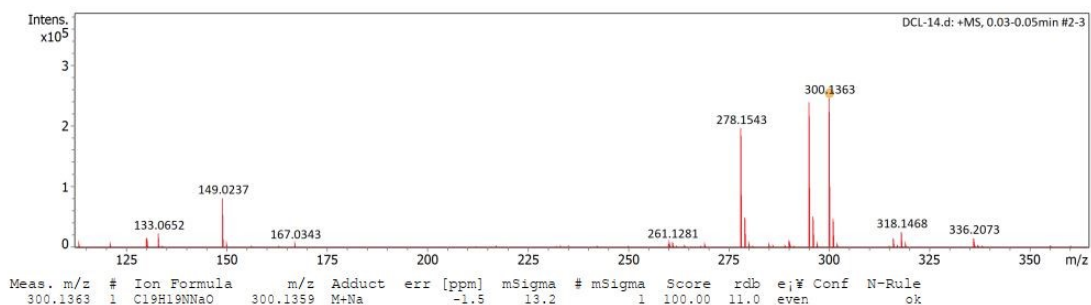

### HRMS of 30d

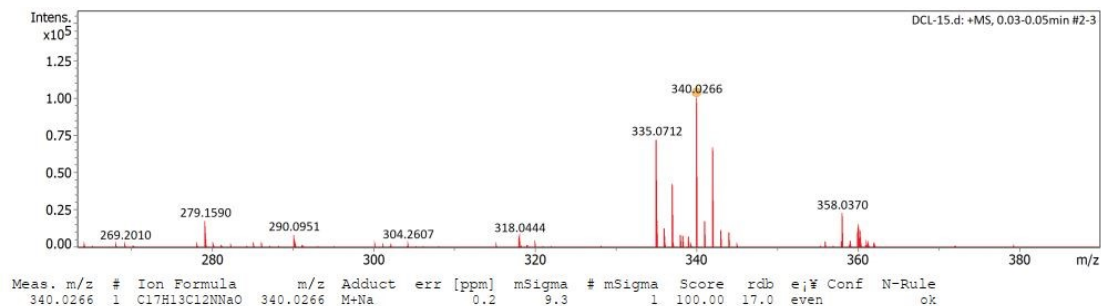

### HRMS of 31d

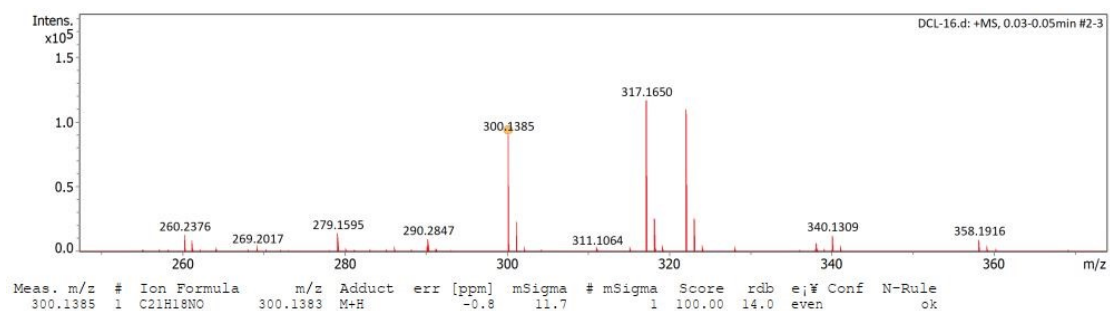

### HRMS of 32d

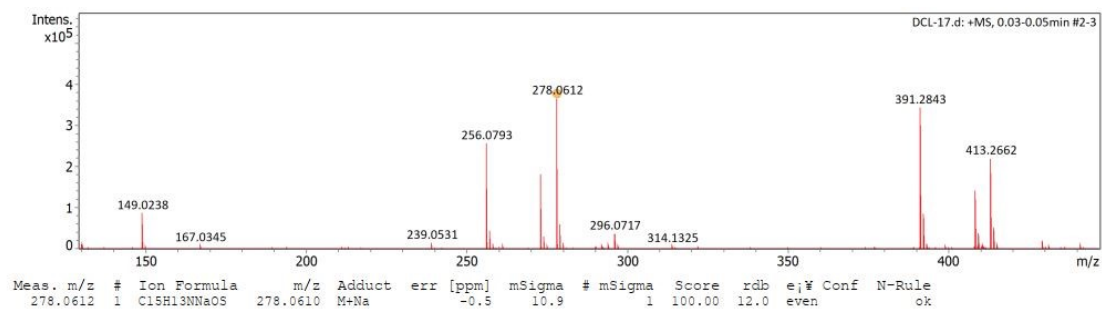

### HRMS of 33d

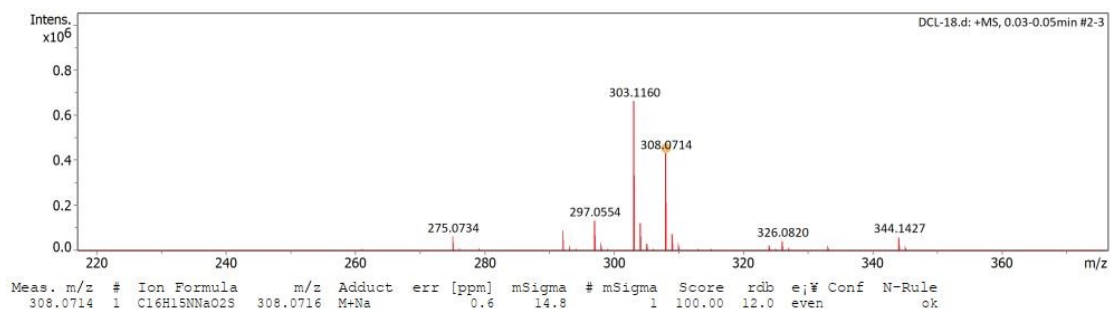

### HRMS of 35d

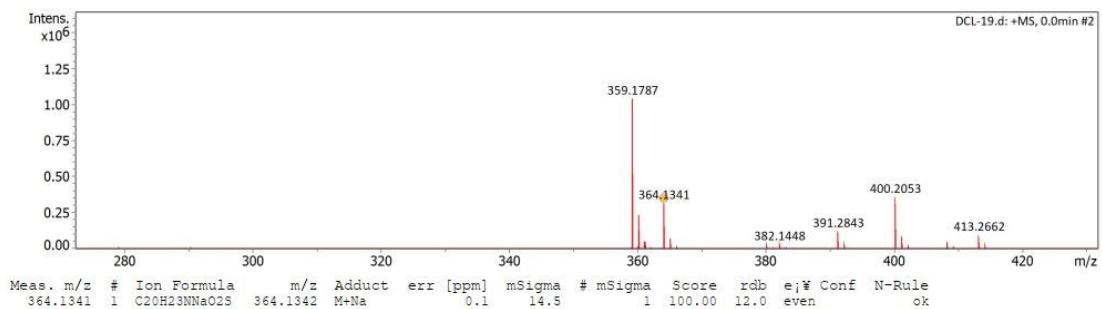



### HRMS of 36d

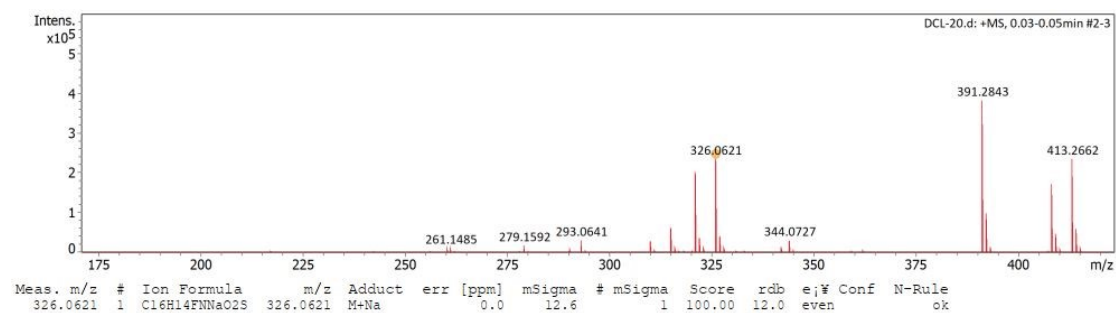

### HRMS of 37d

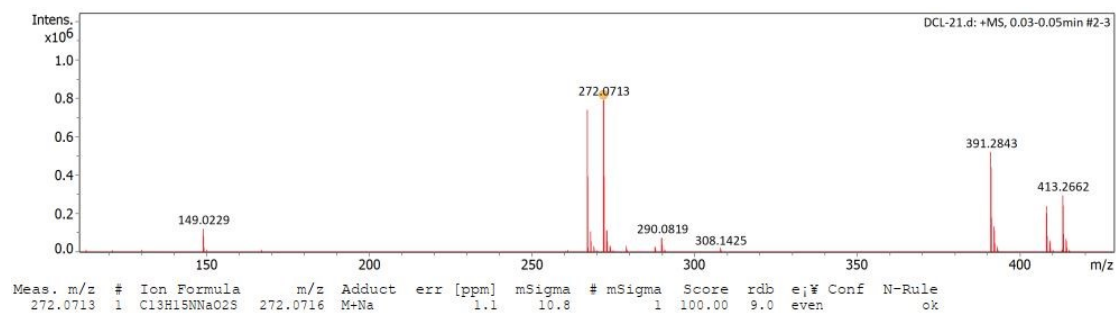

### HRMS of 38d

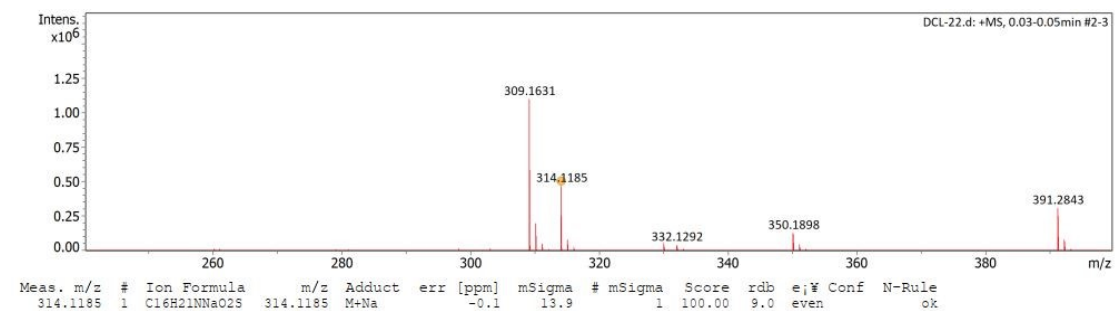

### HRMS of 39d

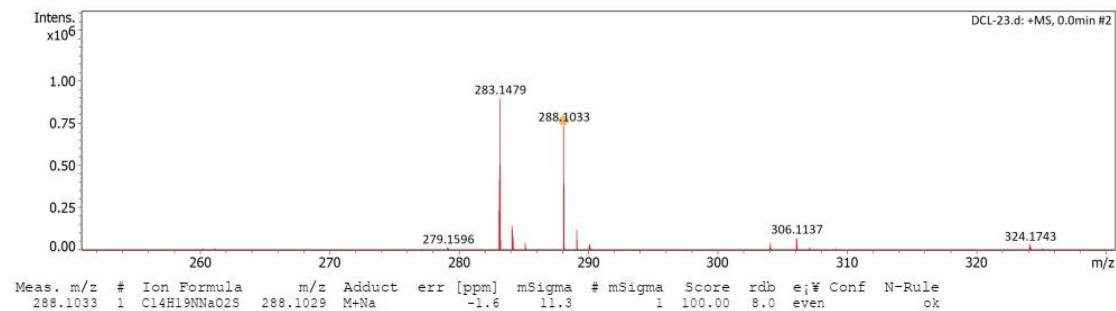

# HRMS of 40d

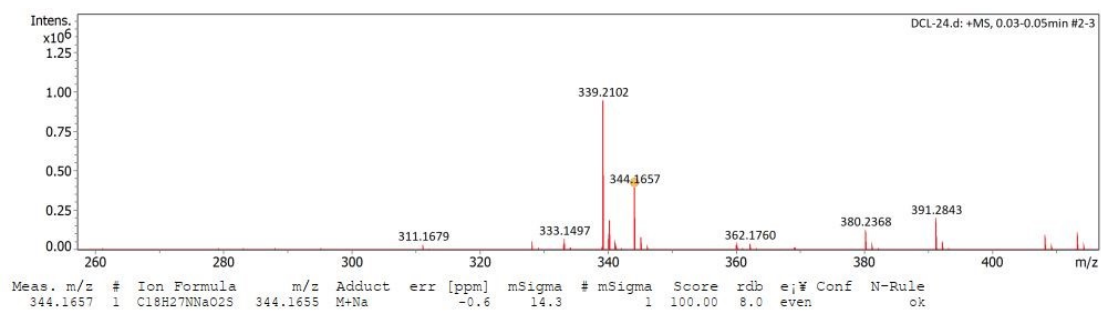

Supplement: d3qo00592e1.pdf [file d3qo00592e1.pdf]
